# Supplementary material for: Transcriptomic and histological analysis of exposed facial skin areas wrinkled or not and unexposed skin
Source: Research Square preprint supplement (doi:10.21203/rs.3.rs-234540/v1), 2021-02-23
Supplement: Supplementary file 1 [file 4bb5f26169ece59204102c13.xlsx]

## Sheet: Supp2
Suplpemental Table 2. Pathway Analysis of Differentially Expressed (DE) Genes and their effect on Networks with impact on their Predicted Activation State.
Comparison	Categories	Diseases or Functions Annotation	p-value	Predicted Activation State	Activation z-score	Molecules	# Molecules
A1 versus A2	Cellular Function and Maintenance	Cellular homeostasis	7.58e-06	Decreased	-3.307	ALOX5,ARG1,ATP13A4,ATP2B2,C3,CCL19,CCL22,CD2,CD3D,CD3G,CD4,CD5,CD52,CD69,CD74,CYBB,EGF,IL2RG,IRF8,LCP2,SAA1,SASH3,SCARA5,SLC46A2,UBD	25
	Cellular Movement,Immune Cell Trafficking	Leukocyte migration	7.3e-09	Decreased	-3.231	ALOX5,ALOX5AP,ARG1,C3,CCL19,CCL22,CD2,CD4,CD5,CD69,CD74,CD84,CYBB,EGF,EVL,KLK5,LCP2,LYZ,MMP9,SAA1,SERPINB3,TNFRSF21,VCAM1	23
	Cellular Movement,Hematological System Development and Function,Immune Cell Trafficking	Lymphocyte migration	7.2e-11	Decreased	-3.171	ALOX5,C3,CCL19,CCL22,CD2,CD4,CD69,CD74,EVL,KLK5,LCP2,MMP9,SAA1,SERPINB3,TNFRSF21,VCAM1	16
	Cellular Movement,Hematological System Development and Function,Immune Cell Trafficking,Inflammatory Response	Cell movement of neutrophils	8.18e-06	Decreased	-3.109	ALOX5,ALOX5AP,C3,CCL19,CD69,CD74,CYBB,MMP9,SAA1,VCAM1	10
	Cellular Movement,Hematological System Development and Function,Immune Cell Trafficking	Cell movement of leukocytes	6.61e-09	Decreased	-3.076	ALOX5,ALOX5AP,ARG1,C3,CCL19,CCL22,CD2,CD4,CD5,CD69,CD74,CYBB,EGF,EVL,KLK5,LCP2,MMP9,SAA1,SERPINB3,TNFRSF21,VCAM1	21
	Cellular Movement	Migration of cells	4.79e-07	Decreased	-3.068	ALOX5,ALOX5AP,ARG1,C3,CCL19,CCL22,CD2,CD4,CD5,CD69,CD74,CD84,CYBB,EBF3,EGF,EVL,HOTAIRM1,HOXA1,KLK5,KRT2,LCP2,LYZ,MMP9,NOSTRIN,PAX3,PCSK5,SAA1,SERPINB3,SLC1A3,SRGN,TNFRSF21,VCAM1	32
	Cell-To-Cell Signaling and Interaction,Hematological System Development and Function,Immune Cell Trafficking,Inflammatory Response	Activation of leukocytes	1.77e-10	Decreased	-3.037	ALOX5,C3,CCL22,CD2,CD3G,CD4,CD5,CD69,CD74,CD84,CYBB,HLA-DPB1,IL2RG,IRF8,LCP2,MMP9,NLRC3,SAA1,SASH3,TNFRSF21,VCAM1	21
	Cell-To-Cell Signaling and Interaction,Hematological System Development and Function,Immune Cell Trafficking,Inflammatory Response	Activation of lymphocytes	2.67e-09	Decreased	-2.924	ALOX5,C3,CCL22,CD2,CD3G,CD4,CD5,CD69,CD74,HLA-DPB1,IL2RG,IRF8,NLRC3,SAA1,SASH3,TNFRSF21	16
	Cellular Movement,Hematological System Development and Function,Immune Cell Trafficking	Cell movement of granulocytes	1.18e-06	Decreased	-2.854	ALOX5,ALOX5AP,C3,CCL19,CD2,CD69,CD74,CYBB,KLK5,MMP9,SAA1,VCAM1	12
	Cellular Development,Cellular Growth and Proliferation,Hematological System Development and Function,Hematopoiesis,Lymphoid Tissue Structure and Development,Tissue Development	Leukopoiesis	3.83e-06	Decreased	-2.85	ALOX5,ARG1,CCL19,CD2,CD3D,CD3G,CD4,CD5,CD69,CD74,CYBB,IL2RG,IRF8,LCP2,SASH3,SLC46A2,UBD	17
	Cell-To-Cell Signaling and Interaction,Hematological System Development and Function,Immune Cell Trafficking,Inflammatory Response	Activation of T lymphocytes	2.96e-07	Decreased	-2.791	C3,CCL22,CD2,CD3G,CD4,CD74,HLA-DPB1,IL2RG,IRF8,NLRC3,SAA1,TNFRSF21	12
	Cell-To-Cell Signaling and Interaction,Hematological System Development and Function	Interaction of lymphocytes	2.14e-07	Decreased	-2.758	CCL19,CCL22,CD2,CD4,CD69,EVL,LCP2,SAA1,VCAM1	9
	Cell-To-Cell Signaling and Interaction,Hematological System Development and Function	Interaction of leukocytes	9.18e-07	Decreased	-2.694	C3,CCL19,CCL22,CD2,CD4,CD69,CD74,CYBB,EVL,LCP2,SAA1,VCAM1	12
	Cell-To-Cell Signaling and Interaction	Activation of cells	9.55e-09	Decreased	-2.623	ALOX5,C3,CCL22,CD2,CD3G,CD4,CD5,CD69,CD74,CD84,CYBB,EGF,HLA-DPB1,IL2RG,IRF8,KRT2,LCP2,MMP9,NLRC3,SAA1,SASH3,TNFRSF21,VCAM1	23
	Cell-To-Cell Signaling and Interaction	Binding of blood cells	5.51e-08	Decreased	-2.618	C3,CCL19,CCL22,CD2,CD4,CD69,CD74,CD84,CYBB,EVL,IRF8,LCP2,SAA1,VCAM1	14
	Cell-To-Cell Signaling and Interaction,Cellular Movement,Hematological System Development and Function,Immune Cell Trafficking	Recruitment of leukocytes	1.04e-06	Decreased	-2.612	ALOX5,ALOX5AP,C3,CCL19,CCL22,CD4,CD69,CD74,LYZ,MMP9,VCAM1	11
	Lymphoid Tissue Structure and Development,Tissue Morphology	Quantity of lymphoid tissue	6.97e-07	Decreased	-2.602	ARG1,C3,CD3G,CD4,CD5,CD74,CD84,HOXA3,IL2RG,IRF8,LCP2,SASH3	12
	Hematological System Development and Function,Tissue Morphology	Quantity of leukocytes	8.79e-11	Decreased	-2.576	ADAMTS12,ALOX5,ARG1,C3,CCL19,CCL22,CD3D,CD3G,CD4,CD5,CD69,CD74,CD84,CYBB,HOXA3,IL2RG,IRF8,LCP2,MMP9,NLRC3,SAA1,SASH3,TNFRSF21,VCAM1,ZC3H12D	25
	Cellular Development,Cellular Growth and Proliferation,Embryonic Development,Hematological System Development and Function,Hematopoiesis,Lymphoid Tissue Structure and Development,Organ Development,Organismal Development,Tissue Development	Lymphopoiesis	2.24e-05	Decreased	-2.554	ARG1,CCL19,CD2,CD3D,CD3G,CD4,CD5,CD69,CD74,IL2RG,IRF8,LCP2,SASH3,SLC46A2	14
	Cell-To-Cell Signaling and Interaction,Hematological System Development and Function	Binding of leukocytes	5.59e-06	Decreased	-2.542	C3,CCL19,CCL22,CD2,CD4,CD69,CD74,CYBB,EVL,LCP2,VCAM1	11
	Cell-To-Cell Signaling and Interaction,Cellular Movement	Recruitment of myeloid cells	1.54e-07	Decreased	-2.534	ALOX5,ALOX5AP,C3,CCL19,CCL22,CD4,CD69,CD74,LYZ,MMP9,VCAM1	11
	Cell-mediated Immune Response,Cellular Function and Maintenance,Hematological System Development and Function	T cell homeostasis	1.8e-06	Decreased	-2.524	ARG1,CCL19,CD2,CD3D,CD3G,CD4,CD5,CD69,CD74,IL2RG,IRF8,LCP2,SASH3,SLC46A2	14
	Cell-mediated Immune Response,Cellular Development,Cellular Function and Maintenance,Cellular Growth and Proliferation,Embryonic Development,Hematological System Development and Function,Hematopoiesis,Lymphoid Tissue Structure and Development,Organ Development,Organismal Development,Tissue Development	T cell development	7.53e-06	Decreased	-2.524	ARG1,CD2,CD3D,CD3G,CD4,CD5,CD69,CD74,IL2RG,IRF8,LCP2,SASH3,SLC46A2	13
	Inflammatory Response	Inflammatory response	9.66e-07	Decreased	-2.521	ADAMTS12,ALOX5,ALOX5AP,C3,CCL19,CCL22,CD4,CD69,CD74,CD84,CYBB,EGF,LYZ,MMP9,NLRC3,SAA1,SASH3,VCAM1	18
	Cellular Movement	Cell movement	1.87e-06	Decreased	-2.456	ALOX5,ALOX5AP,ARG1,C3,CCL19,CCL22,CD2,CD4,CD5,CD69,CD74,CD84,CYBB,EBF3,EGF,EVL,HOTAIRM1,HOXA1,IRF8,KLK5,KRT2,LCP2,LYZ,MMP9,NOSTRIN,PAX3,PCSK5,SAA1,SERPINB3,SLC1A3,SRGN,TNFRSF21,VCAM1	33
	Cell-To-Cell Signaling and Interaction,Inflammatory Response	Immune response of phagocytes	0.000775	Decreased	-2.447	C3,CCL19,CCL22,IRF8,SAA1,VCAM1	6
	Cell-mediated Immune Response,Cellular Movement,Hematological System Development and Function,Immune Cell Trafficking	T cell migration	1.54e-08	Decreased	-2.442	ALOX5,C3,CCL19,CCL22,CD4,CD69,CD74,KLK5,LCP2,MMP9,SAA1,TNFRSF21	12
	Gastrointestinal Disease,Hepatic System Disease,Organismal Injury and Abnormalities	Liver Damage	0.000435	Decreased	-2.433	ALOX5,C3,EGF,IL2RG,MMP9,SAA1	6
	Cell-To-Cell Signaling and Interaction,Cellular Movement,Hematological System Development and Function,Immune Cell Trafficking	Recruitment of granulocytes	1.08e-06	Decreased	-2.425	ALOX5,ALOX5AP,C3,CCL19,CCL22,CD69,LYZ,MMP9,VCAM1	9
	Cellular Movement,Hematological System Development and Function,Immune Cell Trafficking	Migration of granulocytes	8.75e-05	Decreased	-2.4	C3,CCL19,CYBB,MMP9,SAA1,VCAM1	6
	Cell-To-Cell Signaling and Interaction,Hematological System Development and Function	Interaction of T lymphocytes	4.69e-07	Decreased	-2.391	CCL19,CCL22,CD2,CD4,CD69,EVL,LCP2,VCAM1	8
	Hematological System Development and Function,Lymphoid Tissue Structure and Development,Tissue Morphology	Quantity of T lymphocytes	1.18e-09	Decreased	-2.389	CCL19,CD3D,CD3G,CD4,CD5,CD69,CD74,CD84,HOXA3,IL2RG,IRF8,LCP2,MMP9,SAA1,SASH3,TNFRSF21,VCAM1,ZC3H12D	18
	Cell-To-Cell Signaling and Interaction,Hematological System Development and Function,Immune Cell Trafficking	Adhesion of immune cells	1.61e-05	Decreased	-2.381	C3,CCL19,CCL22,CD2,CD4,CD69,CD74,CYBB,LCP2,VCAM1	10
	Cell-To-Cell Signaling and Interaction,Hematological System Development and Function	Binding of mononuclear leukocytes	5.44e-06	Decreased	-2.376	CCL19,CCL22,CD2,CD4,CD69,EVL,LCP2,VCAM1	8
	Cellular Movement	Chemotaxis of myeloid cells	3.05e-06	Decreased	-2.375	ALOX5,C3,CCL19,CCL22,CD4,CD69,CD74,CYBB,SAA1,VCAM1	10
	Cellular Movement,Hematological System Development and Function,Immune Cell Trafficking,Inflammatory Response	Chemotaxis of leukocytes	3.97e-06	Decreased	-2.36	ALOX5,C3,CCL19,CCL22,CD4,CD69,CD74,CYBB,MMP9,SAA1,VCAM1	11
	Cellular Movement,Hematological System Development and Function,Immune Cell Trafficking,Inflammatory Response	Cell movement of phagocytes	3.43e-08	Decreased	-2.356	ALOX5,ALOX5AP,ARG1,C3,CCL19,CCL22,CD4,CD5,CD69,CD74,CYBB,EGF,KLK5,MMP9,SAA1,TNFRSF21,VCAM1	17
	Cell-To-Cell Signaling and Interaction,Cellular Movement,Hematological System Development and Function,Immune Cell Trafficking,Inflammatory Response	Recruitment of phagocytes	6.51e-07	Decreased	-2.356	ALOX5,ALOX5AP,CCL19,CCL22,CD4,CD69,CD74,LYZ,MMP9,VCAM1	10
	Cellular Movement,Hematological System Development and Function,Immune Cell Trafficking,Inflammatory Response	Chemotaxis of phagocytes	4.21e-06	Decreased	-2.343	ALOX5,C3,CCL19,CCL22,CD4,CD69,CD74,CYBB,SAA1,VCAM1	10
	Cellular Movement	Cell movement of myeloid cells	2.68e-08	Decreased	-2.325	ALOX5,ALOX5AP,ARG1,C3,CCL19,CCL22,CD2,CD4,CD69,CD74,CYBB,EGF,KLK5,MMP9,SAA1,TNFRSF21,VCAM1	17
	Hematological System Development and Function,Lymphoid Tissue Structure and Development,Tissue Morphology	Quantity of lymphocytes	2.91e-08	Decreased	-2.316	C3,CCL19,CD3D,CD3G,CD4,CD5,CD69,CD74,CD84,HOXA3,IL2RG,IRF8,LCP2,MMP9,SAA1,SASH3,TNFRSF21,VCAM1,ZC3H12D	19
	Hematological System Development and Function,Lymphoid Tissue Structure and Development,Tissue Morphology	Quantity of CD4+ T-lymphocytes	3.18e-07	Decreased	-2.274	CD3D,CD4,CD5,CD69,CD74,CD84,IL2RG,LCP2,TNFRSF21	9
	Cell-To-Cell Signaling and Interaction	Adhesion of blood cells	4.68e-06	Decreased	-2.258	C3,CCL19,CCL22,CD2,CD4,CD69,CD74,CYBB,LCP2,SAA1,VCAM1	11
	Inflammatory Response	Immune response of cells	0.00077	Decreased	-2.245	C3,CCL19,CCL22,CD4,CD69,CD74,IL2RG,IRF8,LCP2,SAA1,VCAM1	11
	Cell-mediated Immune Response,Cellular Development,Cellular Function and Maintenance,Cellular Growth and Proliferation,Embryonic Development,Hematological System Development and Function,Hematopoiesis,Lymphoid Tissue Structure and Development,Organ Development,Organismal Development,Tissue Development	Differentiation of T lymphocytes	4.58e-05	Decreased	-2.228	CD3D,CD3G,CD4,CD69,CD74,IL2RG,IRF8,LCP2,SASH3,SLC46A2	10
	Cell-To-Cell Signaling and Interaction	Adhesion of tumor cell lines	0.000266	Decreased	-2.225	CYBB,EGF,KLK5,LCP2,NOSTRIN,SAA1,SRGN,VCAM1	8
	Cell-To-Cell Signaling and Interaction,Cellular Growth and Proliferation,Hematological System Development and Function	Stimulation of T lymphocytes	9.21e-08	Decreased	-2.213	C3,CCL19,CD2,CD4,CD5,CD52,CD69,CD74	8
	Cell-To-Cell Signaling and Interaction,Cellular Movement,Hematological System Development and Function,Immune Cell Trafficking,Inflammatory Response	Recruitment of neutrophils	3.27e-05	Decreased	-2.213	ALOX5,ALOX5AP,CCL19,CCL22,CD69,LYZ,MMP9	7
	Cellular Movement,Hematological System Development and Function,Immune Cell Trafficking,Inflammatory Response	Chemotaxis of neutrophils	0.00114	Decreased	-2.213	ALOX5,C3,CCL19,CD69,CD74	5
	Cellular Movement	Cell movement of leukemia cell lines	9e-05	Decreased	-2.201	C3,CCL19,CCL22,LCP2,MMP9,VCAM1	6
	Cellular Movement,Hematological System Development and Function,Immune Cell Trafficking,Inflammatory Response	Migration of neutrophils	0.000265	Decreased	-2.183	CCL19,CYBB,MMP9,SAA1,VCAM1	5
	Cell-To-Cell Signaling and Interaction,Hematological System Development and Function	Binding of T lymphocytes	3.1e-06	Decreased	-2.177	CCL19,CCL22,CD2,CD69,EVL,LCP2,VCAM1	7
	Cellular Movement,Hematological System Development and Function,Immune Cell Trafficking	Cellular infiltration by leukocytes	3.81e-06	Decreased	-2.173	ALOX5AP,ARG1,C3,CCL19,CCL22,CD2,CYBB,KLK5,MMP9,SAA1,TNFRSF21,VCAM1	12
	Cellular Movement,Hematological System Development and Function,Immune Cell Trafficking,Inflammatory Response	Cell movement of dendritic cells	1.46e-05	Decreased	-2.139	C3,CCL19,CCL22,CD5,CD74,CYBB,MMP9	7
	Cell-To-Cell Signaling and Interaction,Inflammatory Response	Immune response of antigen presenting cells	0.000471	Decreased	-2.137	C3,CCL19,CCL22,CD74,IRF8,SAA1	6
	Cell-mediated Immune Response,Cellular Movement,Hematological System Development and Function,Immune Cell Trafficking	Cell movement of T lymphocytes	5.1e-07	Decreased	-2.067	C3,CCL19,CCL22,CD69,CD74,KLK5,LCP2,MMP9,SAA1,TNFRSF21	10
	Cell-To-Cell Signaling and Interaction,Hematological System Development and Function	Activation of myeloid cells	8.16e-05	Decreased	-2.065	C3,CCL22,CD4,CD84,CYBB,LCP2,MMP9,SAA1,VCAM1	9
	Cellular Function and Maintenance,Cellular Movement,Hematological System Development and Function,Immune Cell Trafficking	Localization of leukocytes	4.85e-06	Decreased	-2	C3,CCL19,CD4,CD69	4
	Cell-To-Cell Signaling and Interaction,Cellular Compromise,Cellular Function and Maintenance,Inflammatory Response	Respiratory burst of phagocytes	3.01e-05	Decreased	-2	C3,CCL22,IRF8,VCAM1	4
	Cell-To-Cell Signaling and Interaction,Inflammatory Response	Respiratory burst of myeloid cells	4.5e-05	Decreased	-2	C3,CCL22,IRF8,VCAM1	4
	Lymphoid Tissue Structure and Development,Tissue Morphology	Quantity of lymph follicle	0.000113	Decreased	-2	C3,CD74,CD84,IL2RG,IRF8,SASH3	6
	Hematological System Development and Function,Hematopoiesis,Lymphoid Tissue Structure and Development,Organ Morphology,Tissue Morphology	Quantity of double-positive thymocyte	0.000131	Decreased	-2	CD4,CD5,IL2RG,LCP2,SASH3	5
	Developmental Disorder,Organismal Injury and Abnormalities	Hypoplasia of lymphatic system	0.000725	Increased	2.166	CD3G,HOXA3,IL2RG,LCP2,SASH3	5
	Infectious Diseases	Infection of mammalia	0.000258	Increased	2.301	C3,CD4,CD74,CYBB,IL2RG,IRF8,MMP9,UBD	8
A1 versus A3	Cellular Movement	Cell movement	8.08e-11	Decreased	-3.253	A2M,ACAP3,ACKR3,ACP5,ADAM33,ADD2,ADRB2,ADTRP,ALOX5,ANPEP,APOE,AQP1,ARG1,BMP2,C3,CBLB,CCL2,CCN1,CCN3,CD300A,CD74,CD93,CEACAM6,CHI3L1,CHST1,CLCA2,CLDN7,CLEC10A,CNN1,COL7A1,CST6,CTNND2,CTSV,CXCR2,CYBB,CYP1B1,DGKA,DIO2,DLL4,DNAH11,DOCK8,DPP10-AS1,EBF3,EEF1A2,EGFL7,EGR1,EGR3,ELMO1,EPHB2,ERG,ESAM,EVL,F10,FGF7,FGFBP1,FLT4,FOXQ1,GJA1,GMFG,GPR132,H19,HBEGF,HMGCR,HOTAIRM1,ITGA11,ITGA8,ITGA9,ITGAL,ITPR1,KDR…	143
	Molecular Transport	Quantity of metal ion	2.71e-06	Decreased	-2.999	A2M,APOE,AQP1,C3,CALN1,CCL2,CLDN7,CXCR2,CYBB,ESRRG,FGF7,GRIN2A,GRK5,HOXA3,HSD11B2,IRAG1,ITPR1,ITPR2,KDR,NPPC,NRN1,P2RX7,P2RY2,PMP22,PTH1R,RHCG,SCNN1B,SELE,SGK1,SLC9A3R2,TACR1,TRPC6,WNK4	33
	Cellular Movement	Chemotaxis	1.71e-05	Decreased	-2.901	A2M,ACKR3,ALOX5,APOE,BMP2,C3,CCL2,CCN1,CCN3,CD74,CXCR2,CYBB,DGKA,EGR3,ELMO1,EPHB2,F10,FGF7,FGFBP1,GPR132,HBEGF,ITGA9,ITGAL,KDR,LIF,LSP1,MMP28,MYO1F,P2RY2,PDGFRA,PDGFRB,PLEKHG5,RGS5,RHOG,SELE,SEMA3E,THBS2,TRPC6	38
	Cellular Movement,Immune Cell Trafficking	Migration of lymphatic system cells	1.06e-05	Decreased	-2.874	ACKR3,ADRB2,ALOX5,APOE,C3,CBLB,CCL2,CD74,CTSV,CXCR2,DOCK8,ELMO1,EVL,FLT4,GPR132,ITGA9,ITGAL,KDR,KLK5,P2RX7,PTPRB,RUNX1,SELE,SEMA3E,SERPINB3,SERPINE2,STAB1,THBS2,TNFRSF21	29
	Molecular Transport	Quantity of metal	8.58e-06	Decreased	-2.828	A2M,ADD2,APOE,AQP1,BMP2,C3,CALN1,CCL2,CLDN7,CXCR2,CYBB,ESRRG,FGF7,GRIN2A,GRK5,HOXA3,HSD11B2,IRAG1,ITPR1,ITPR2,KDR,NPPC,NRN1,P2RX7,P2RY2,PMP22,PTH1R,RHCG,SCNN1B,SELE,SGK1,SLC9A3R2,TACR1,TRPC6,WNK4	35
	Cellular Function and Maintenance,Molecular Transport	Flux of ion	9.12e-06	Decreased	-2.816	A2M,ADRB2,APOE,BCAP31,C3,CCL2,CD300A,CXCR2,CYBB,EGR1,EPHB2,ERG,GJA1,GPR132,NPPC,P2RX7,P2RY2,RHCG,RIC3,SCNN1B,SGK1,SLC12A4,SNCA,TRPC6,VWF,WNK4	26
	Cardiovascular System Development and Function,Tissue Morphology	Permeability of blood vessel	9.94e-05	Decreased	-2.733	APOE,AQP1,C3,CXCR2,ESAM,KDR,LSP1,PTPRB,TACR1,TRPC6,VWF	11
	Cell Signaling,Cellular Function and Maintenance,Molecular Transport,Vitamin and Mineral Metabolism	Flux of Ca2+	9.07e-05	Decreased	-2.684	A2M,ADRB2,APOE,C3,CCL2,CD300A,CXCR2,CYBB,EGR1,EPHB2,ERG,GJA1,GPR132,NPPC,P2RX7,P2RY2,RIC3,SGK1,SNCA,TRPC6,VWF,WNK4	22
	Cellular Movement	Migration of cells	7.22e-11	Decreased	-2.682	A2M,ACAP3,ACKR3,ACP5,ADAM33,ADD2,ADRB2,ADTRP,ALOX5,ANPEP,APOE,AQP1,ARG1,BMP2,C3,CBLB,CCL2,CCN1,CCN3,CD300A,CD74,CD93,CEACAM6,CHI3L1,CHST1,CLCA2,CLDN7,CLEC10A,COL7A1,CST6,CTSV,CXCR2,CYBB,CYP1B1,DIO2,DLL4,DOCK8,DPP10-AS1,EBF3,EEF1A2,EGFL7,EGR1,EGR3,ELMO1,EPHB2,ERG,ESAM,EVL,F10,FGF7,FLT4,FOXQ1,GJA1,GMFG,GPR132,H19,HBEGF,HMGCR,HOTAIRM1,ITGA8,ITGA9,ITGAL,ITPR1,KDR,KIF26B,KLK5,KRT2,LAMA3,LAMA5,LIF,LIMS…	132
	Cell-To-Cell Signaling and Interaction	Adhesion of tumor cell lines	6.64e-06	Decreased	-2.682	APOE,CCL2,CCN1,CCN3,CLCA2,CST6,CYBB,EGFL7,EGR1,EGR3,F10,GMFG,ITGA9,ITGAL,KLK5,LAMA3,LGALS4,LIF,MINK1,MMP19,P2RY2,PARVG,RASGRP2,SELE,SLC7A5,TNFRSF25	26
	Cellular Function and Maintenance,Molecular Transport	Flux of cation	3.24e-05	Decreased	-2.662	A2M,ADRB2,APOE,C3,CCL2,CD300A,CXCR2,CYBB,EGR1,EPHB2,ERG,GJA1,GPR132,NPPC,P2RX7,P2RY2,RHCG,RIC3,SCNN1B,SGK1,SNCA,TRPC6,VWF,WNK4	24
	Cellular Function and Maintenance	Ion homeostasis of cells	0.000308	Decreased	-2.659	A2M,ADRB2,APOE,BCAP31,C3,CCL2,CD300A,CLDN7,CXCR2,CYBB,EGR1,EPHB2,ERG,FAM20A,GJA1,GPR132,GRIK2,HSD11B2,ITPR1,KDR,NPPC,P2RX7,P2RY2,PDGFRA,PTH1R,RHCG,RIC3,SCNN1B,SGK1,SLC12A4,SNCA,TACR1,TMTC2,TRPC6,VWF,WNK4	36
	Cell-To-Cell Signaling and Interaction	Binding of connective tissue cells	8.58e-05	Decreased	-2.596	APOE,BMP2,CCL2,CCN1,COL7A1,ITGA11,ITGA9,ITGAL,LAMA3,MATN3,PALLD,PMP22,POSTN,RUNX2,THBS2	15
	Cellular Movement,Hematological System Development and Function,Immune Cell Trafficking	Lymphocyte migration	7.63e-05	Decreased	-2.578	ACKR3,ALOX5,APOE,C3,CBLB,CCL2,CD74,CTSV,CXCR2,DOCK8,ELMO1,EVL,GPR132,ITGA9,ITGAL,KLK5,P2RX7,PTPRB,RUNX1,SELE,SEMA3E,SERPINB3,SERPINE2,STAB1,THBS2,TNFRSF21	26
	Cellular Movement	Homing of cells	1.13e-05	Decreased	-2.57	A2M,ACKR3,ALOX5,APOE,BMP2,C3,CCL2,CCN1,CCN3,CD74,CXCR2,CYBB,DGKA,EGR3,ELMO1,EPHB2,F10,FGF7,FGFBP1,GJA1,GPR132,HBEGF,ITGA9,ITGAL,KDR,LIF,LSP1,MMP28,MYO1F,P2RY2,PDGFRA,PDGFRB,PLEKHG5,RGS5,RHOG,RUNX1,SELE,SEMA3E,THBS2,TRPC6	40
	Cell-To-Cell Signaling and Interaction	Activation of cells	1.8e-05	Decreased	-2.552	ACKR3,ALOX5,APOE,BMP2,C3,CBLB,CCDC88B,CCL2,CCN1,CCN3,CD300A,CD74,CD93,CEACAM6,CHI3L1,CXCR2,CYBB,DGKA,DGKG,DLL4,EGR3,EPHB2,F10,FOXD1,GIMAP6,GJA1,GRIK2,HBEGF,ITGAL,ITPR1,ITPR2,KAT2A,KDR,KRT2,LGALS4,LIF,LMOD1,LOXL2,LSP1,MMP19,P2RX7,P2RY2,PALLD,PBX3,PDGFRA,PDGFRB,PTH1R,RUNX1,RUNX2,SELE,SERPINE2,SMPD3,SNCA,SYBU,TACR1,TNFRSF21,TRPC6,TSPAN32,UNC13D,VWF	60
	Cellular Function and Maintenance,Molecular Transport	Flux of inorganic cation	7.26e-05	Decreased	-2.531	A2M,ADRB2,APOE,C3,CCL2,CD300A,CXCR2,CYBB,EGR1,EPHB2,ERG,GJA1,GPR132,NPPC,P2RX7,P2RY2,RIC3,SCNN1B,SGK1,SNCA,TRPC6,VWF,WNK4	23
	Cellular Movement,Immune Cell Trafficking	Cell movement of lymphatic system cells	8.29e-05	Decreased	-2.52	ACKR3,ADRB2,ALOX5,APOE,BMP2,C3,CBLB,CCL2,CD74,CTSV,CXCR2,DOCK8,ELMO1,EVL,FLT4,GPR132,ITGA9,ITGAL,KDR,KLK5,P2RX7,PTPRB,RUNX1,SELE,SEMA3E,SERPINB3,SERPINE2,STAB1,THBS2,TNFRSF21	30
	Cell-To-Cell Signaling and Interaction	Adhesion of connective tissue cells	0.000101	Decreased	-2.399	BMP2,CCL2,CCN1,COL7A1,ITGA11,ITGA9,ITGAL,LAMA3,MATN3,PALLD,PMP22,POSTN,RUNX2,THBS2	14
	Cardiovascular System Development and Function,Cellular Movement	Cell movement of endothelial cells	7.98e-07	Decreased	-2.37	ACKR3,ANPEP,APOE,BMP2,CCL2,CCN1,CXCR2,CYP1B1,DGKA,DIO2,DLL4,EGFL7,EGR1,EGR3,ERG,ESAM,FLT4,ITGA9,KDR,KIF26B,LOXL2,PDE2A,PDGFRB,PLEKHG5,PTH1R,SELE,SEMA3E,STAB1,THBS2,TNFRSF25,VASH1,VWF	32
	Cellular Movement,Hematological System Development and Function,Immune Cell Trafficking	Migration of mononuclear leukocytes	0.000111	Decreased	-2.32	ACKR3,ALOX5,APOE,C3,CBLB,CCL2,CD300A,CD74,CTSV,CXCR2,DOCK8,ELMO1,EVL,GPR132,ITGA9,ITGAL,KLK5,P2RX7,PTPRB,RUNX1,SELE,SEMA3E,SERPINB3,SERPINE2,STAB1,THBS2,TNFRSF21	27
	Cellular Movement	Cell movement of blood cells	1.95e-08	Decreased	-2.288	ACKR3,ADD2,ADRB2,ADTRP,ALOX5,APOE,ARG1,BMP2,C3,CBLB,CCL2,CCN1,CD300A,CD74,CD93,CEACAM6,CHI3L1,CHST1,CLEC10A,CTSV,CXCR2,CYBB,CYP1B1,DOCK8,EEF1A2,EGFL7,EGR1,ELMO1,ESAM,EVL,F10,FLT4,GJA1,GPR132,HBEGF,ITGA9,ITGAL,KDR,KLK5,LAMA5,LIF,LSP1,MINK1,MMP28,MYO1F,NCF4,P2RX7,P2RY2,PTPRB,RASGRP2,RGS5,RUNX1,RUNX3,SELE,SEMA3E,SERPINB3,SERPINE2,SGK1,SLC7A5,SLC7A8,SOD3,STAB1,TACR1,THBS2,TNFRSF21,TRPC6,TSPAN15,TSPAN…	69
	Hematological System Development and Function	Hemostasis	9.86e-06	Decreased	-2.278	A2M,ABCB1,ADTRP,APOE,C3,CCL2,CYBB,DGKA,DGKG,DOCK8,EPHB2,F10,FLI1,GRIK2,ITPR1,ITPR2,P2RX6,P2RX7,PDGFRA,RASGRP2,SERPINE2,SGK1,THBS2,TRPC6,TSPAN32,VWF	26
	Cell-To-Cell Signaling and Interaction	Binding of tumor cell lines	1.99e-06	Decreased	-2.267	APOE,CCL2,CCN1,CCN3,CLCA2,CST6,CXCR2,CYBB,DOCK8,EGFL7,EGR1,EGR3,F10,GMFG,GRIA4,ITGA9,ITGAL,KLK5,LAMA3,LAMA5,LGALS4,LIF,MINK1,MMP19,P2RY2,PALLD,PARVG,RASGRP2,SELE,SERPINB3,SLC7A5,TNFRSF25	32
	Cell-mediated Immune Response,Cellular Movement,Hematological System Development and Function,Immune Cell Trafficking	T cell migration	9.04e-05	Decreased	-2.194	ACKR3,ALOX5,APOE,C3,CCL2,CD74,CTSV,CXCR2,DOCK8,ELMO1,ITGA9,ITGAL,KLK5,P2RX7,PTPRB,RUNX1,SELE,SERPINE2,STAB1,THBS2,TNFRSF21	21
	Cellular Movement,Hematological System Development and Function,Immune Cell Trafficking	Cell movement of leukocytes	5.14e-05	Decreased	-2.173	ACKR3,ADRB2,ALOX5,APOE,ARG1,C3,CBLB,CCL2,CCN1,CD300A,CD74,CD93,CHST1,CTSV,CXCR2,CYBB,DOCK8,EEF1A2,EGFL7,ELMO1,EVL,F10,GJA1,GPR132,ITGA9,ITGAL,KDR,KLK5,LAMA5,LSP1,MMP28,MYO1F,P2RX7,PTPRB,RGS5,RUNX1,RUNX3,SELE,SEMA3E,SERPINB3,SERPINE2,SGK1,SOD3,STAB1,TACR1,THBS2,TNFRSF21,TRPC6,TSPAN15,VWF	50
	Cellular Assembly and Organization,Tissue Development	Formation of filaments	0.000257	Decreased	-2.167	A2M,ADAMTS10,APOE,ARHGAP6,CCL2,CXCR2,DES,ESAM,EVL,FGF7,KDR,KIF17,LMOD1,MINK1,MSRB1,NEB,PALLD,PHLDB2,POSTN,PTPRB,SELE,SGK1,SNCA,STMN2,TACR1,TENM1,THSD4,TPM2,TRPC6	29
	Cellular Movement,Immune Cell Trafficking	Leukocyte migration	6.77e-08	Decreased	-2.13	ACKR3,ADD2,ADRB2,ADTRP,ALOX5,APOE,ARG1,BMP2,C3,CBLB,CCL2,CCN1,CD300A,CD74,CD93,CEACAM6,CHI3L1,CHST1,CLEC10A,CTSV,CXCR2,CYBB,CYP1B1,DOCK8,EEF1A2,EGFL7,EGR1,ELMO1,ESAM,EVL,F10,FLT4,GJA1,GPR132,HBEGF,ITGA9,ITGAL,KDR,KLK5,LAMA5,LIF,LSP1,MMP28,MYO1F,NCF4,P2RX7,P2RY2,PTPRB,RASGRP2,RGS5,RUNX1,RUNX3,SELE,SEMA3E,SERPINB3,SERPINE2,SGK1,SLC7A5,SLC7A8,SOD3,STAB1,TACR1,THBS2,TNFRSF21,TRPC6,TSPAN15,VWF	67
	Cell-To-Cell Signaling and Interaction	Interaction of tumor cell lines	5.41e-07	Decreased	-2.107	APOE,CCL2,CCN1,CCN3,CLCA2,CST6,CXCR2,CYBB,DOCK8,EGFL7,EGR1,EGR3,F10,GJA1,GJA3,GMFG,GRIA4,ITGA9,ITGAL,KLK5,LAMA3,LAMA5,LGALS4,LIF,MINK1,MMP19,P2RY2,PALLD,PARVG,RASGRP2,SELE,SERPINB3,SLC7A5,TNFRSF25	34
	Cell Morphology,Cellular Movement	Cell spreading	0.000113	Decreased	-2.094	A2M,C3,CCN1,CXCR2,ELMO1,GPR132,ITGA11,ITGA9,ITGAL,LAMA3,MINK1,PALLD,PARVG,PMP22,POSTN,RASGRP2,RHOG,RUNX1,THBS2,TSPAN32,VWF	21
	Cellular Movement	Cell movement of tumor cell lines	4.71e-06	Decreased	-2.067	A2M,ACKR3,ADAM33,ADRB2,ANPEP,BMP2,C3,CBLB,CCL2,CCN1,CCN3,CLDN7,CNN1,COL7A1,CST6,CXCR2,DOCK8,DPP10-AS1,EGR1,ELMO1,EPHB2,ERG,FGF7,FOXQ1,GJA1,GMFG,GPR132,H19,HBEGF,HMGCR,HOTAIRM1,ITGAL,ITPR1,KDR,LAMA3,LAMA5,LIF,LINC00672,MFNG,MINK1,MMP19,NEK3,NKD2,NR5A2,P2RY2,PALLD,PARVG,PDGFRA,POSTN,PRKN,PTPRU,RHOG,RUNX1,RUNX2,RUNX3,SELE,SEMA3C,SEMA3E,SERPINB3,SLC9A3R2,SPARCL1,TACR1,TBX3,THBS2,TNFRSF21,TNFRSF25	66
	Nervous System Development and Function	Sensory system development	1.11e-05	Decreased	-2.062	ADRB2,ALDH1A1,ALDH1A2,APOE,AQP1,ASPA,BMP2,C3,CCL2,CDC14B,CDHR1,CYP1B1,DLL4,EBF3,EGFLAM,EGR1,EPHB2,FGF7,FLT4,FOXD1,GJA3,HIF3A,HOXA3,HSF4,KDR,LIF,OTX1,RARB,RDH12,RGS11,RUNX3,SEMA3E,SHROOM4,SLC1A3,THBS2,WNT2B	36
	Cardiovascular System Development and Function,Cellular Movement	Migration of endothelial cells	9.67e-06	Decreased	-2.01	ACKR3,APOE,BMP2,CCL2,CCN1,CXCR2,CYP1B1,DIO2,DLL4,EGFL7,EGR1,EGR3,ERG,ESAM,FLT4,ITGA9,KDR,KIF26B,LOXL2,PDE2A,PDGFRB,PLEKHG5,PTH1R,SELE,SEMA3E,STAB1,TNFRSF25,VASH1	28
	Embryonic Development,Organismal Development	Development of body trunk	3.12e-05	Decreased	-2.006	ACKR3,ADRB2,ALDH1A1,ALDH1A2,ANKS6,ANPEP,APOE,AQP1,ARG2,BMP2,CACNB4,CCL2,CCN1,CCN3,CD74,CHI3L1,CXCR2,DLL4,DMRTA1,DNAH11,EGR1,EGR3,ERG,ESRRG,FAM20A,FGF7,FLI1,FLT4,FOXD1,GJA1,GRK5,HBEGF,HIF3A,HOXA3,HOXD9,HSD11B2,HSD17B2,ITGA11,ITGA8,ITGAL,KDR,LAMA5,LIF,LIMS2,LOXL2,LRP4,LRRC6,MEF2A,MEOX1,NAB1,NEB,NPPC,NR5A2,OSR2,OVOL2,PDE2A,PDGFRA,PDGFRB,PTH1R,RARB,RSPO1,RUNX1,RUNX2,RUNX3,SELE,SEMA3C,SMPD3,TBX3,TNNT2…	70
	Organismal Injury and Abnormalities	Bleeding	6.73e-06	Increased	3.191	ACKR3,ADRB2,ALDH1A1,ALDH3A1,ALOX5,APOE,C3,CACNB4,CNN1,CYP2C19,ERG,F10,FLI1,FLT4,GABRE,GRIN2A,KAT2A,LIF,MINK1,OVOL2,PDGFRA,PDGFRB,RARB,RASGRP2,RUNX1,RXRG,SELE,SGK1,THBS2,TNFRSF21,TNNT2,UNC13D,VWF	33
A2 versus A3	Cancer,Organismal Injury and Abnormalities	Breast or colorectal cancer	1.34e-06	Decreased	-2.607	AATK,ABCA10,ABCA6,ABCA8,ABCA9,ACADVL,ACKR3,ACP5,ACP6,ACSL5,ADAMTS10,ADAMTS18,ADGRD1,ADGRF5,ADRB2,ADTRP,ALDH1A1,ANGPTL4,ANKRD6,ANO5,ANTXR2,APOC1,APOE,ARHGAP44,ATP6V1B1,ATP6V1C2,B2M,BCAS1,BNC2,C16orf96,C3orf70,CCDC102B,CCN2,CD200R1,CD69,CDCA5,CDH19,CDHR1,CEACAM5,CEACAM6,CELF2,CFAP69,CFTR,CHI3L1,CHI3L2,CIT,CLDN7,CLEC3B,CLSTN2,CNN1,CNNM1,COL6A6,COL7A1,COLEC12,CORO6,CRAT,CRISPLD1,CXCR2,CYP1B1,CYP27A1,…	254
	Cellular Assembly and Organization,Tissue Development	Formation of filaments	0.000746	Decreased	-2.429	ACE,ADAMTS10,ADGRF5,APOE,ARHGAP6,CCN2,CXCR2,DIRAS3,FGF7,KDR,LMOD1,MSRB1,NEB,PAK3,PDLIM4,PHLDB2,PLAT,POSTN,PTPRB,SATB2,SELE,SGK1,SNCA,STMN2,SYNM,TENM1,THSD4,TPM2	28
	Embryonic Development,Organ Development,Organismal Development,Renal and Urological System Development and Function,Tissue Development	Formation of kidney	0.000538	Decreased	-2.395	ACE,APOE,ARG2,CFAP53,CXCR2,CYP27A1,FAT4,FGF7,FLT4,FOXD1,HSD17B2,KDR,LIF,LRP4,MMP9,PPARGC1A,RARB,SOX8,TKT,TSHZ3,XDH	21
	Cellular Assembly and Organization,Tissue Development	Fibrogenesis	0.000229	Decreased	-2.323	ACE,ADAMTS10,ADGRF5,APOE,ARHGAP6,CCN2,CXCR2,DIRAS3,FGF7,KDR,KLHL41,LIF,LMOD1,MSRB1,NEB,PAK3,PDLIM4,PHLDB2,PLAT,POSTN,PTPRB,SATB2,SELE,SGK1,SNCA,STAB1,STMN2,SYNM,TENM1,THSD4,TNNT2,TPM2	32
	Dermatological Diseases and Conditions,Organismal Injury and Abnormalities	Keratosis	6.63e-08	Decreased	-2.236	ABHD5,APOE,DGAT2,FDPS,G6PD,GJA1,IDH1,KRT9,ME1,MVD,MVK,PGD,PMVK,RSPO1,SOAT1,SRXN1,STAT1,TKT	18
	Cancer,Organismal Injury and Abnormalities	Breast or pancreatic cancer	3.51e-09	Decreased	-2.2	AATK,ABCA10,ABCA8,ABCA9,ABHD12B,ABHD6,ACADVL,ACAT2,ACKR3,ACO1,ACP5,ACSM3,ADAMTS10,ADAMTS18,ADGRD1,ADGRF5,ADRB2,ALDH1A1,ANKRD6,APOC1,APOE,ARG2,ARHGAP44,ATP6V1B1,B2M,C3orf70,CCN2,CCN3,CD69,CDH19,CDHR1,CEACAM6,CELF2,CFAP91,CFTR,CHI3L1,CHI3L2,CIT,CLDN7,CLEC3B,CLSTN2,CNN1,CNNM1,COL6A6,COL7A1,COLEC12,CORO6,CRAT,CRISPLD1,CXCR2,CYP3A5,DCD,DCDC1,DDIT4,DGKG,DHCR24,DHCR7,DIO2,DIRAS3,DIXDC1,DLG2,DLL4,DUSP16,…	221
	Organismal Development	Development of genitourinary system	0.000129	Decreased	-2.165	ACE,AGPAT1,ALDH1A1,ANGPTL4,APOE,ARG2,BCAP31,CCN2,CFAP53,CFTR,CIT,CLDN11,CXCR2,CYP27A1,DHCR24,DIO2,DIRAS3,EGR1,EN1,FADS2,FASN,FAT4,FGF7,FLT4,FOXD1,FOXD3,GAL,GJA1,H19,H2AX,HMGA1,HOXD9,HSD17B2,INSIG1,KDR,KIT,LIF,LRP4,LRRC6,MMP19,MMP9,NR1H3,NR5A2,PDE3B,PLIN2,PPARGC1A,RARB,RSPO1,SOX8,TBX3,TF,THEG,THRSP,TKT,TSHZ3,UGT8,VWF,WDR19,XDH	59
	Carbohydrate Metabolism,Lipid Metabolism,Molecular Transport,Small Molecule Biochemistry	Concentration of colfosceril palmitate	8.43e-06	Increased	2	ELOVL1,FASN,INSIG1,THRSP	4
	Lipid Metabolism,Small Molecule Biochemistry	Hydrolysis of acylglycerol	6.49e-06	Increased	2.035	ABHD5,ABHD6,ANGPTL4,APOE,ELOVL5,PLA2G7,PLIN2,SNCA	8
	Lipid Metabolism,Small Molecule Biochemistry	Metabolism of acylglycerol	3.55e-07	Increased	2.094	ABHD5,ABHD6,ACSL1,ACSL5,ALDH1A1,APOE,DGAT2,FASN,FITM2,INSIG1,KIT,NR1H3,PCTP,PLIN2,PNPLA5,PPARGC1A,THRSP,TNXB	18
	Lipid Metabolism,Small Molecule Biochemistry	Fatty acid metabolism	3.09e-12	Increased	2.098	ABCA8,ACAA2,ACADL,ACADVL,ACSL1,ACSL5,ACSM3,ALOX15B,ANGPTL4,APOC1,APOE,ATP6V1B1,AWAT1,AWAT2,CFTR,CPT2,CRAT,CYP1B1,CYP27A1,EGR1,ELOVL1,ELOVL3,ELOVL5,FA2H,FADS1,FADS2,FAR2,FASN,HACD2,HAO2,IL16,INSIG1,KCNN4,KIT,LIF,MCAT,ME1,MKNK1,MMP7,MSMO1,NR1H3,PCTP,PLIN2,PPARGC1A,PTGIS,RARB,RUNX1,SLC35A2,SLC9A3R2,SNCA,SOAT1,THRSP,TNXB,UGT1A8 (includes others),UGT8,VWF	56
	Lipid Metabolism,Small Molecule Biochemistry	Synthesis of triacylglycerol	3.39e-07	Increased	2.176	ACSL1,ACSL5,ALDH1A1,APOE,DGAT2,FASN,FITM2,NR1H3,PCTP,PLIN2,PPARGC1A,THRSP	12
	Amino Acid Metabolism,Small Molecule Biochemistry	Metabolism of amino acids	0.000717	Increased	2.2	ACAD8,ARG2,ASPA,CSAD,DIO2,EGR1,GLDC,GPT,IDH1,KYAT1,LOC102724788/PRODH,ME1,PHYKPL,SLC5A6,TST	15
	Lipid Metabolism,Small Molecule Biochemistry	Conversion of lipid	3.4e-06	Increased	2.215	ABHD5,ALOX15B,ANGPTL4,APOE,CFTR,CRAT,CYP1B1,DHCR24,FADS1,FASN,HMGCR,HSD11B2,HSD17B2,HSD3B1,PTGIS,SNCA	16
	Lipid Metabolism,Molecular Transport,Small Molecule Biochemistry	Secretion of sterol	1.99e-05	Increased	2.219	ACAT2,APOE,LPCAT3,NR1H3,PCTP,SOAT1	6
	Lipid Metabolism,Small Molecule Biochemistry	Metabolism of membrane lipid derivative	1.67e-15	Increased	2.252	A4GALT,ABCA8,ABHD5,ABHD6,ACAT2,ACER1,ACP6,ACSL5,ADRB2,AGPAT1,AGPAT3,ALDH3B2,APOC1,APOE,ASPA,CERS4,CFTR,CYP1B1,CYP27A1,DHCR24,DHCR7,EBP,ELOVL1,FA2H,FADS1,FASN,FDPS,FGF7,G6PD,GPD1,HACD2,HMGCR,HMGCS1,HSD17B2,INSIG1,KDR,KIT,MSMO1,MVD,MVK,NR1H3,PCTP,PGRMC1,PLA2G7,PLCH2,PMVK,SGPP2,SLC35A2,SNCA,SOAT1,SULT2B1,TM7SF2,UGT8,XDH	54
	Lipid Metabolism,Small Molecule Biochemistry	Metabolism of triacylglycerol	6.12e-08	Increased	2.417	ABHD5,ACSL1,ACSL5,ALDH1A1,APOE,DGAT2,FASN,FITM2,INSIG1,NR1H3,PCTP,PLIN2,PNPLA5,PPARGC1A,THRSP,TNXB	16
	Lipid Metabolism,Small Molecule Biochemistry	Synthesis of lipid	2.47e-24	Increased	2.438	A4GALT,ABCA8,ABHD5,ABHD6,ACADL,ACADVL,ACAT2,ACER1,ACP6,ACSL1,ACSL5,ACSM3,ADRB2,AGPAT1,AGPAT3,ALDH1A1,ALDH3B2,ALOX15B,ANGPTL4,APOC1,APOE,ASPA,AWAT1,AWAT2,CERS4,CFTR,CYB5A,CYP1B1,CYP27A1,CYP2R1,DGAT2,DHCR24,DHCR7,DHRS11,EBP,EGR1,ELOVL1,ELOVL3,ELOVL5,FA2H,FADS1,FADS2,FAR2,FASN,FDPS,FGF7,FITM2,G6PD,GBGT1,GPD1,HACD2,HMGCR,HMGCS1,HSD11B2,HSD17B2,HSD3B1,IDH1,IL16,INSIG1,KDR,KIT,LIF,MCAT,ME1,MKNK1,MMP9,M…	92
A1 – Periorbital area (crow’s feet); A2 – Preauricular area (wrinkle-free); A3 - Gluteal area; DE - Differentially Expressed.
