# Supplementary material for: Transcriptomic and histological analysis of exposed facial skin areas wrinkled or not and unexposed skin
Source: Research Square preprint supplement (doi:10.21203/rs.3.rs-234540/v1), 2021-02-23
Supplement: Supplementary file 3 [file a19a7c653b18e1f93fdccefe.xlsx]

## Sheet: Supp1
Suplpemental Table 1. Differentially Expressed (DE) Genes.
Gene ID	Area 1 vs Area 2		Area 1 vs Area 3		Area 2 vs Area 3		DE A1 VS A3	DE A2 VS A3	Normalized Counts (CPM)			Normalized Counts (CPM)
	Fold change	P-value	Fold change	P-value	Fold change	P-value			Mean A1	Mean A2	Mean A3	P8B_A1	P8B_A2	P8B_A3	P11_A1	P11_A2	P11_A3	P14_A1	P14_A2	P14_A3	P16_A1	P16_A2	P16_A3	P17_A1	P17_A2	P17_A3	P18_A1	P18_A2	P18_A3	P19_A1	P19_A2	P19_A3	P20_A1	P20_A2	P20_A3
GBP6	3.73892	2.47556e-05	3.17437	0.000330811	-1.17785	0.327831	TRUE	FALSE	50.8135	13.5904	16.0074	88.4273	25.408	14.3036	35.3843	16.825	14.7181	43.1296	22.0003	16.821	40.9747	4.63985	19.2888	21.3529	9.66278	16.6047	108.644	13.7523	12.414	21.6119	10.2411	26.368	46.983	6.19385	7.54108
FLG	5.08221	4.06784e-05	5.4312	5.64936e-05	1.06867	0.900476	TRUE	FALSE	2155.81	424.188	396.932	2526.71	212.161	426.151	331.777	169.174	209.905	1631.51	148.63	286.704	2967.07	369.823	458.491	1277.03	303.271	154.576	3239.06	839.941	489.669	943.351	431.444	430.819	4330	919.061	719.138
LYZ	-3.4269	0.00054131	-1.76321	0.0674035	1.94355	0.0509229	FALSE	FALSE	27.5526	94.4198	48.5811	10.2032	42.5506	13.1294	15.9647	137.279	33.0852	43.1295	132.501	16.6623	12.3924	168.073	42.1736	7.7011	35.0831	56.9301	60.8403	40.0227	48.1036	18.0715	131.113	80.5321	52.1181	68.7361	98.0328
ZC3H12D	-2.89169	0.000568724	-3.06451	0.000132278	-1.05976	0.578236	TRUE	FALSE	1.42539	4.12179	4.36812	1.04658	2.0016	4.0563	1.3702	8.93365	5.3521	2.17411	6.66684	7.45841	0.599728	4.49178	5.23092	0.700191	2.37861	2.37218	1.88955	2.11583	3.29063	1.32779	2.60927	3.62569	2.29498	3.77677	3.55876
ARHGAP9	-2.24438	0.000657134	-2.08736	0.00124676	1.07523	0.803817	TRUE	FALSE	3.8189	8.57107	7.97143	3.13953	8.54354	4.26979	6.31445	15.9316	10.7041	3.01566	8.66687	8.41053	1.19936	10.1187	5.55785	2.97549	4.60845	10.2001	5.8574	5.99466	6.846	4.42573	6.84917	7.36115	3.62359	7.85558	10.4219
EVL	-2.88986	0.000903147	-2.00599	0.0259069	1.44062	0.175441	TRUE	FALSE	5.39098	15.5792	10.8142	5.23248	18.1989	6.61812	3.27642	19.8028	7.90647	13.5351	24.667	16.4242	3.19811	27.0982	11.4425	2.10037	9.21681	20.8744	6.99108	5.46573	4.47275	4.20445	10.8934	3.52376	4.58985	9.29072	15.2515
FLG-AS1	5.38049	0.00113765	4.50582	0.00190212	-1.19412	0.840323	TRUE	FALSE	80.3839	14.9399	17.84	97.3382	12.2481	29.3186	6.28019	5.03064	3.32393	87.5029	9.37217	15.992	68.8469	10.7851	10.9756	42.2898	6.82693	4.82776	123.794	20.6313	19.6663	26.232	19.0936	17.2166	190.787	35.5311	41.3992
GRIA4	3.50233	0.00131661	4.4237	0.000108919	1.26307	0.342846	TRUE	FALSE	4.8649	1.38904	1.09974	3.66277	1.66801	1.92146	3.15728	0.59567	0.608282	2.3845	1.50012	2.61844	7.79526	1.97446	0.327026	2.10037	0.297413	0.948933	8.69158	2.29214	0.273936	7.08111	1.50037	0.659298	4.04633	1.28417	1.44051
PCSK5	2.03617	0.00141291	1.80265	0.00871135	-1.12954	0.465566	FALSE	FALSE	36.3995	17.8765	20.1923	82.9335	13.677	28.8206	23.5896	23.2273	20.6783	26.5091	9.16687	28.2465	25.5842	17.4238	16.0195	23.8032	18.7308	18.5023	49.5038	25.9178	19.1686	26.4802	15.0028	14.1729	32.7927	19.8654	15.9294
HOXA3	-4.17092	0.00235336	-7.42116	1.80598e-05	-1.77926	0.0703652	TRUE	FALSE	1.56874	6.5431	11.6419	3.66277	3.50222	3.09562	1.07235	5.21134	13.2585	1.47282	0.500106	4.99876	0.990839	11.2539	25.1734	2.45042	4.4598	11.1489	0.706651	13.2234	11.0448	0.442659	4.75221	11.5361	1.75145	9.4418	12.8791
CD74	-2.05333	0.00265	-2.1243	0.00142646	-1.03457	0.806841	TRUE	FALSE	37.1926	76.3687	79.0085	24.8539	108.039	52.8375	22.0408	86.3578	85.024	57.3659	33.8338	39.1959	39.5755	132.579	109.193	24.5033	77.4502	102.949	28.9087	45.6646	102.964	45.2153	78.0795	43.3973	55.0777	48.9456	96.5077
SKAP2	-1.80451	0.00287241	-2.88903	1.78532e-05	-1.60101	0.0594088	TRUE	FALSE	15	27.0675	43.3353	6.54057	25.723	31.8093	4.58695	13.5493	24.0841	31.9791	26.8337	44.1152	23.3856	29.1713	53.616	8.05115	30.1774	61.9115	8.12475	35.0859	32.3127	15.0472	27.0702	47.5722	22.2846	28.9294	51.2618
SBSN	2.02532	0.0028752	2.90242	3.06348e-05	1.43307	0.0894739	TRUE	FALSE	20.8949	10.3169	7.19913	40.2894	10.2855	7.68555	19.8963	7.29584	8.39302	15.9896	5.66683	4.28466	9.19439	7.30524	4.25014	14.352	10.1087	5.93031	16.8162	13.0471	8.21518	19.3991	12.1328	7.14141	31.2225	16.693	11.6928
CD3D	-2.96474	0.00298277	-1.09035	0.777908	2.71906	0.00598487	FALSE	TRUE	1.5009	4.44979	1.63651	1.04658	3.39153	1.17426	1.3702	3.95916	0.365009	4.27799	3.66681	1.11091	0.799604	7.74947	0.980879	0.700191	6.39233	2.13497	0.377991	1.76321	2.46462	1.62283	7.24055	0.87903	1.81185	1.43524	3.98241
BLMH	1.91974	0.00395253	2.49074	0.000697075	1.29744	0.49629	TRUE	FALSE	94.3931	49.1698	37.8976	106.479	24.6667	33.6239	29.8444	19.0583	43.9109	111.857	25.3337	27.8498	88.1454	78.9252	58.8468	102.738	48.3135	32.2604	121.303	75.1084	27.5662	65.0568	41.812	35.4869	129.721	80.1407	43.6361
HAL	4.45328	0.00459175	6.22769	0.00311222	1.39845	0.875325	TRUE	FALSE	17.1136	3.84291	2.74798	49.7078	2.03866	5.97767	6.67188	4.61577	4.25738	16.1298	0.166769	0.952225	3.59787	1.43151	1.63473	2.97549	1.48667	0.948933	9.06947	5.81835	3.92508	9.44145	4.76184	3.18622	39.3148	10.4237	1.10159
LSP1	-1.79515	0.00463025	-4.81698	9.37524e-09	-2.68332	1.79738e-05	TRUE	TRUE	51.2687	92.0353	246.96	62.5269	143.714	401.895	69.4576	128.643	327.921	37.6594	46.6672	326.586	23.5854	89.3883	177.848	34.6546	73.1391	155.608	62.7301	109.313	227.313	59.0823	85.5167	156.778	60.4533	59.9011	201.733
CCL22	-3.03575	0.00487585	-1.52457	0.0666526	1.99121	0.253203	FALSE	FALSE	5.67865	17.239	8.65752	2.61629	3.00235	8.85971	10.9609	12.3582	7.54156	15.7792	10.1669	7.85513	0.799604	59.6752	6.53863	3.50055	11.0007	7.35356	3.40112	12.6945	18.3471	4.20445	21.4605	5.05395	4.16712	7.55345	7.71054
MMP9	-2.82598	0.00530282	-1.07141	0.494439	2.63763	0.0264179	FALSE	TRUE	1.41548	4.00011	1.51655	0.261719	2.39078	3.66787	0.178808	8.0403	1.21646	1.61307	2.83347	0.872881	0.399852	8.88473	1.96166	4.37567	2.52726	2.37218	1.13377	3.87893	0.365215	1.54907	2.0857	0.659298	1.81185	1.3597	1.01686
VCAM1	-2.4244	0.00541955	-1.70473	0.179262	1.42216	0.109064	FALSE	FALSE	6.5342	15.8415	11.139	0.784957	19.1255	6.08441	6.31447	18.165	3.40592	11.7117	20.5003	5.15744	7.19563	19.5463	9.80789	8.75124	19.6228	11.1489	8.12475	9.34457	35.9639	5.16333	14.6115	4.83422	4.22751	5.81618	12.7096
RNASE6	-2.47286	0.00542561	-1.35781	0.314628	1.82121	0.0545588	FALSE	FALSE	2.27172	5.61765	3.08456	1.30819	2.09426	1.81472	1.25106	4.46688	1.3381	3.15592	2.50013	1.90435	1.59911	12.5867	5.55785	2.80046	3.27055	4.26985	1.51166	7.93408	2.82974	2.803	6.19688	4.50462	3.74438	5.89171	2.45727
ARG1	4.88285	0.00560591	3.00259	0.015979	-1.62621	0.65968	TRUE	FALSE	48.4102	9.91435	16.1228	190.197	18.0321	52.0903	5.54006	7.44473	26.1519	49.0906	6.83351	11.2669	21.1869	7.10781	12.4233	16.4522	8.62218	6.87914	40.2454	16.5733	2.5559	22.7183	9.26265	13.2939	41.8514	5.43851	4.32134
HLA-DOB	-2.12864	0.00630419	-1.19549	0.634845	1.78056	0.0193198	FALSE	FALSE	4.6864	9.97566	5.60253	4.97086	13.2508	4.48327	3.63384	13.2515	2.06792	5.18967	7.33352	7.69644	1.99886	16.6835	8.82711	10.8515	8.02756	12.0977	2.26744	10.4024	4.19892	5.01581	5.87073	3.07636	3.5632	4.98531	2.37254
HLA-DPB1	-2.13555	0.00652923	-1.59567	0.0878463	1.33834	0.245312	FALSE	FALSE	104.592	223.362	166.895	69.6798	273.606	62.9107	73.6624	111.705	77.4245	185.685	163.217	152.806	72.2946	545.641	304.151	109.914	199.456	248.461	139.068	189.434	184.692	94.4129	201.684	136.463	92.0213	102.152	168.251
MEIS1	2.13155	0.00663382	1.29723	0.433491	-1.64316	0.0402461	FALSE	FALSE	71.042	33.3288	54.7646	47.3531	29.3557	36.506	177.1	49.2835	97.6742	35.0647	21.5003	46.0195	59.3631	33.3666	29.4235	28.5288	19.9201	42.2232	99.7632	35.9675	54.0371	61.7376	46.1172	80.9716	59.4254	31.1199	51.2618
DMRTA1	2.46528	0.00672382	2.40827	0.00912022	-1.02367	0.898967	TRUE	FALSE	3.80155	1.54204	1.57854	1.30819	1.2603	1.38775	7.98241	1.48903	1.21646	1.47282	1.16678	1.98369	2.59849	1.9251	0.653953	3.50055	1.48667	1.42335	5.66846	3.35	3.10357	4.49949	0.978539	1.75796	3.38203	0.679901	1.10159
LCE2D	3.95325	0.00694143	2.09711	0.320298	-1.8851	0.0654653	FALSE	FALSE	12.8084	3.23997	6.10765	41.8591	2.25889	11.7417	10.0078	2.97795	8.02811	18.2299	0.666774	4.04663	1.59911	0.691127	3.42916	1.75033	1.48667	1.42335	11.9037	8.2867	4.56403	6.18639	1.69606	5.46053	10.931	7.85558	10.1677
ADAMTS18	3.48909	0.00739342	-1.04696	0.879645	-3.65296	0.005118	FALSE	TRUE	3.82315	1.09574	4.00271	4.186	1.72361	2.0282	8.04198	0.744563	5.35211	1.12217	0.333437	12.1397	3.19811	1.72767	5.23092	1.22526	0.743383	1.18614	9.25842	0.705343	1.64312	1.25403	1.95698	2.74676	2.29925	0.830968	1.6947
ARHGAP30	-2.05908	0.00750516	-1.8783	0.0170775	1.09625	0.726854	FALSE	FALSE	4.21638	8.68188	7.91963	1.04658	5.61542	2.56191	3.87211	13.1026	8.87956	5.46378	4.50015	5.39547	3.19811	12.5867	7.84633	4.90074	11.744	12.5721	9.44736	5.28942	6.02449	3.02428	11.4804	8.13021	2.77811	5.13638	11.947
IGSF10	2.06608	0.0078973	1.12366	0.507365	-1.8387	0.0361682	FALSE	FALSE	8.43516	4.0827	7.50686	7.58705	5.05944	4.37653	17.8709	3.72241	8.27138	9.11691	1.83345	4.76072	9.19439	4.44242	4.57707	4.37567	5.05443	4.50706	8.69158	4.58418	18.2558	6.41726	4.56615	5.05395	4.22751	3.39911	10.2524
FLG2	2.92057	0.00791568	2.03905	0.0459203	-1.43232	0.439849	TRUE	FALSE	455.568	155.986	223.422	870.406	105.486	333.036	201.941	154.699	302.632	426.735	59.8341	94.4192	191.681	64.1669	84.674	146.669	80.572	35.8186	428.528	237.491	256.402	269.078	189.426	212.262	1109.51	356.216	468.134
SLC46A2	3.27905	0.00800259	2.15221	0.144937	-1.52358	0.180994	FALSE	FALSE	4.97508	1.51723	2.31162	19.3599	1.11204	3.84282	3.15728	1.34013	1.09483	5.89096	0.333437	1.74566	1.59911	0.345613	3.59629	2.45042	1.18935	0.711725	1.88955	4.40786	1.278	3.09804	1.36991	1.64809	2.35537	2.0395	4.57553
SCARA5	2.7229	0.00852529	-1.66239	0.305295	-4.5265	0.000633725	FALSE	TRUE	10.3116	3.78698	17.1418	2.87791	8.54355	11.5283	30.2614	0.59567	2.79774	9.11691	1.16678	4.76072	6.39613	1.53023	18.9618	8.05115	14.4198	25.8558	6.04635	2.29214	45.8221	17.6289	1.36991	7.58087	2.1138	0.377767	19.8269
PAX3	2.44358	0.00877023	1.49682	0.443097	-1.63251	0.0496452	FALSE	FALSE	41.96	17.1716	28.0327	34.7954	14.511	15.1575	80.955	11.3159	28.3414	15.4285	13.1669	29.5159	14.591	20.1386	25.8273	21.1778	16.947	34.6325	111.1	23.802	40.9842	30.7582	20.8735	23.6213	26.8743	16.6175	26.1817
CDHR1	-2.16175	0.0104122	-5.5723	1.58136e-06	-2.57768	0.00194697	TRUE	TRUE	52.6787	113.878	293.542	74.3	95.0139	364.211	19.5984	164.822	445.555	32.47	98.1679	473.762	12.992	33.9097	227.214	16.2772	45.0431	215.147	88.9933	272.223	237.598	97.8065	85.4506	161.505	78.9922	116.397	223.343
FRMPD1	2.30699	0.0107592	2.91993	0.00082981	1.26569	0.308152	TRUE	FALSE	5.10386	2.21234	1.74794	13.6043	1.03791	1.70798	2.38288	1.63792	3.28429	3.85721	1.16678	1.03157	4.79712	2.1719	3.59629	2.80046	1.63532	0.711725	4.91268	4.40787	1.55184	3.88633	2.54404	0.659298	4.58986	3.09697	1.44051
MPEG1	-2.15756	0.0118068	-1.82671	0.156667	1.18112	0.221125	FALSE	FALSE	1.89592	4.09056	3.4633	1.56981	1.50122	1.49449	1.42977	4.61577	1.21646	2.52475	3.83348	2.45976	1.79898	4.24498	3.92322	1.22526	6.24368	9.72564	3.02322	5.11311	1.23492	1.84411	3.84863	3.07636	1.75145	3.32357	4.57553
C15orf59	3.04679	0.0126892	4.62772	0.00108891	1.51889	0.324685	TRUE	FALSE	49.159	16.1347	10.6227	165.605	27.15	22.9497	24.6023	6.25359	12.1637	28.192	3.33347	12.0603	21.1869	14.1168	4.57707	14.877	10.4061	9.01402	87.2928	31.9123	10.132	16.67	10.8282	2.30729	34.846	25.0772	11.7776
CD2	-3.00383	0.0129312	-1.01827	0.909995	2.94995	0.00991131	FALSE	TRUE	5.96893	17.9297	6.07796	2.09305	11.0853	1.60123	4.16996	6.25359	1.45974	11.7117	17.8336	4.04663	5.59663	64.4126	10.7887	7.52608	17.5416	14.2326	10.77	9.69718	3.65125	1.47531	11.0238	7.25128	4.40868	5.58958	5.59229
LCP2	-2.62551	0.0132061	-1.92342	0.0532508	1.36502	0.52915	FALSE	FALSE	1.54534	4.05731	2.97234	0.261719	2.18692	1.60123	2.02546	10.5715	2.31119	3.08579	7.00018	1.90435	0.599728	2.96164	0.653953	0.350145	1.93264	4.03264	2.64533	1.23427	4.10764	1.40155	4.30523	3.40596	1.99302	2.2661	5.76175
SRGN	-2.23414	0.013752	-1.40211	0.204843	1.59342	0.189951	FALSE	FALSE	6.28568	14.0431	8.81319	3.92438	11.3419	6.19115	9.76949	32.1609	4.74392	9.88833	18.3336	4.76072	7.19563	13.1296	11.1156	5.25078	13.9738	8.06518	2.64533	4.05524	15.1524	5.75342	14.7419	10.9867	5.85808	4.60764	9.48987
FAM83A	1.67943	0.0139888	3.02669	2.12074e-05	1.80221	0.0165216	TRUE	FALSE	36.1784	21.542	11.9531	56.2481	25.538	14.7305	43.2473	10.5715	9.85266	26.9998	15.667	16.7416	27.9828	31.0963	8.82711	45.1559	12.9332	14.9442	31.365	25.2125	13.6006	25.1524	11.2848	13.6235	33.2758	40.0328	3.30457
SERPINB3	3.97662	0.0140402	3.89027	0.000155478	-1.0222	0.0832867	TRUE	FALSE	80.1516	20.1557	20.6031	133.458	13.4891	13.5563	36.9163	20.057	8.51465	33.9004	26.5194	1.66632	33.5792	8.69011	1.96166	23.2396	5.79771	5.21868	166.629	13.2234	5.20298	28.0026	29.111	122.688	185.488	44.3581	6.01594
GPX3	-3.31759	0.0140709	-1.22322	0.610507	2.71218	0.043764	FALSE	TRUE	13.3281	44.2171	16.3032	6.01734	32.1723	18.253	31.2741	18.4628	3.77083	13.1844	56.5007	8.33119	8.99452	9.32896	8.50019	11.7266	66.0036	15.4186	8.31369	5.28942	27.9314	21.9808	79.6443	19.6662	5.13338	86.3349	28.5541
ALOX5	-2.62701	0.0143542	-2.57426	0.0055314	1.02049	0.689424	TRUE	FALSE	2.02424	5.31771	5.21093	2.09305	2.70583	7.25857	0.834072	16.6761	6.6901	2.10398	6.83351	10.6322	1.99886	1.97446	2.28858	2.62544	2.52726	4.50706	1.88955	3.52631	4.56403	1.99163	5.8055	2.52703	2.65733	2.49271	3.21984
ADAMTS12	-2.8771	0.0144094	-2.35342	0.0360507	1.22252	0.682635	TRUE	FALSE	1.72165	4.95336	4.05177	0.261719	3.70658	3.84282	4.46781	6.10469	0.729919	0.98191	0.666774	2.45976	1.39923	5.72575	9.48096	1.75033	11.8926	6.87914	1.51166	6.17097	2.5559	2.4342	2.41358	3.07636	0.966365	2.94591	3.3893
CYBB	-2.5085	0.0156862	-2.69915	0.00458809	-1.076	0.607525	TRUE	FALSE	1.81423	4.551	4.89688	0.261719	3.24327	2.7754	1.84675	11.9115	6.56847	2.94553	2.6668	2.45975	1.39923	4.98536	2.94244	1.75033	2.67592	8.5396	1.88955	1.05796	2.92102	2.06539	6.39256	4.83421	2.35537	3.47464	8.13418
CD5	-2.53726	0.0157136	-1.24955	0.461365	2.03054	0.0772158	FALSE	FALSE	1.44715	3.67181	1.8083	1.30819	2.31665	0.854038	2.08503	5.36023	2.06792	3.36631	4.50015	2.5391	0.199976	8.68729	1.63473	1.40028	3.56786	4.50706	0.566936	1.23427	0.365215	0.295142	2.34835	0.549432	2.35537	1.3597	1.94889
IL2RG	-2.06869	0.0158868	-1.25235	0.21691	1.65184	0.198996	FALSE	FALSE	2.44591	5.05982	3.06314	1.83143	5.1521	0.96078	0.178808	4.16909	4.74392	4.48838	2.33346	2.69779	1.59911	10.0693	2.61551	0.700191	4.4598	4.74427	2.64533	2.29214	1.64312	3.1718	7.69715	3.62569	4.95221	4.30551	3.47403
TAGAP	-2.0175	0.0166491	-1.53742	0.122411	1.31226	0.342934	FALSE	FALSE	2.40706	4.85623	3.70066	0.784957	2.05719	2.34843	1.78718	3.42463	1.94628	3.85721	3.83348	2.22172	1.59911	6.91037	7.51941	4.72571	11.1493	4.03264	2.64533	4.58418	6.29832	2.28667	3.71817	2.52704	1.57028	3.17251	2.71146
EGF	2.66585	0.0176613	2.04682	0.480853	-1.30244	0.0801182	FALSE	FALSE	4.62898	1.7364	2.26154	6.54058	1.39003	0.96078	2.68073	0.0001	0.486646	5.89096	0.0001	1.42829	6.99576	2.86293	4.57707	5.60083	3.56786	1.66056	3.21217	2.46845	3.19485	3.39308	1.109	1.20863	2.71772	2.49271	4.57553
CNFN	4.30866	0.0180734	1.33862	0.583109	-3.21873	0.00489349	FALSE	TRUE	20.8166	4.83135	15.5508	94.7062	4.70732	15.4777	11.7948	1.48903	30.1659	18.4441	2.83347	9.44201	1.59911	1.72767	9.80789	3.50055	2.52726	7.82797	10.2031	13.576	26.5622	7.74495	3.7834	6.48221	18.5403	8.00665	18.6407
SERHL2	2.28954	0.018389	1.26926	0.666036	-1.80384	0.0474128	FALSE	FALSE	19.7525	8.62726	15.5622	11.508	16.1744	15.6912	30.1923	8.48697	3.64263	36.043	4.83349	11.3414	32.1759	6.40934	23.8657	12.7569	18.1362	16.8419	9.25842	8.46301	21.1598	21.9787	3.65294	16.3694	4.10673	2.86172	15.5858
B2M	-1.86453	0.0184544	1.07748	0.919573	2.009	0.0231831	FALSE	TRUE	1406.9	2623.22	1305.73	1110.34	3988.62	678.774	573.416	3912.3	826.885	3762.09	3881.21	1358.61	1464.69	3371.41	2147.69	734.045	707.347	888.82	957.575	1703.34	1502.97	984.334	1699.48	1347.45	1668.74	1722.06	1694.66
IRF8	-2.4661	0.0189879	-2.12571	0.0657594	1.16013	0.564933	FALSE	FALSE	1.58201	3.9014	3.36291	0.784957	4.09576	1.28101	0.834072	6.40248	3.04101	2.03385	5.8335	1.2696	0.399852	3.06036	0.653953	0.525168	6.09502	9.01402	4.72373	1.5869	3.01229	1.18027	3.45725	4.39475	2.1742	0.679902	4.23661
GMFG	-1.94816	0.01905	-2.19015	0.00951812	-1.12421	0.7657	TRUE	FALSE	2.80007	5.45499	6.13256	1.56981	4.24402	2.66866	4.05083	6.40248	3.40592	4.13773	2.50013	2.61844	2.99824	8.39113	4.57707	1.05024	9.81144	9.25123	4.53479	4.40787	8.30646	1.40155	5.08798	10.4374	2.65733	2.79484	7.79528
CD52	-2.0748	0.0192961	-1.67992	0.135737	1.23506	0.34688	FALSE	FALSE	9.48992	19.6897	15.9423	2.09305	6.76442	4.59002	18.6158	29.4808	20.435	15.2182	16.0003	6.82366	6.19625	19.9905	4.57707	4.20065	14.2711	20.4	7.74686	13.576	27.2924	9.58896	38.5506	24.6102	12.2596	18.8835	18.8102
TMEM230	-2.02373	0.0194682	-1.84104	0.0389378	1.09923	0.753545	FALSE	FALSE	2.73238	5.52962	5.03043	1.04658	11.0214	7.05403	1.09266	9.65227	8.14974	2.52476	3.1668	2.0787	4.79712	2.57385	2.61551	0.891531	3.12189	4.19431	4.53479	5.60857	2.28207	2.72924	5.54459	8.45981	4.24238	3.54756	5.4093
AADAC	3.08392	0.0194928	6.2796	0.000768618	2.03624	0.195666	TRUE	FALSE	13.511	4.38113	2.15157	9.41838	2.61317	1.06752	0.834072	1.19124	2.06792	17.5324	1.16678	0.793537	10.1938	3.35652	2.61551	9.97639	2.37861	0.711725	22.6735	4.05524	2.46462	5.08957	5.93596	2.74676	32.37	14.3515	4.74499
ELMO1	-1.97131	0.0200957	-2.0023	0.0166723	-1.01572	0.934712	TRUE	FALSE	2.42259	4.77567	4.85075	3.66277	4.78145	2.45517	0.476656	12.5071	3.40592	1.82346	3.83348	4.12597	2.59849	3.99818	4.57707	2.62544	2.08129	6.87914	0.755881	2.99738	3.65125	5.38461	4.30523	2.52702	2.05341	3.70124	11.1845
ZNF366	-2.20086	0.0202964	-1.82658	0.0668583	1.20491	0.579181	FALSE	FALSE	2.86334	6.30181	5.23013	1.56981	3.85484	2.45517	3.87211	10.2737	3.16265	3.57669	2.16679	3.49122	2.59849	8.4405	5.23092	3.32553	12.1899	9.48843	2.64533	6.87621	3.65125	3.68812	4.04431	3.51582	1.63067	2.56824	10.8456
SLC43A1	-2.03064	0.0209099	-3.96336	0.00157148	-1.95178	0.290737	TRUE	FALSE	9.22116	18.7248	36.5467	5.75572	27.1134	52.197	1.25106	25.7585	28.3414	19.6363	15.5003	108.385	6.79588	25.2719	47.0775	8.57621	9.51412	23.9581	11.3368	18.3364	6.48088	12.6869	11.6109	10.767	7.73044	16.693	15.1668
LCE1B	2.31763	0.0210739	2.41866	0.0431229	1.04359	0.743741	TRUE	FALSE	69.1917	29.8545	28.6075	195.906	41.0706	27.5754	39.2315	9.60009	18.3389	60.3374	7.04149	13.2505	20.1876	17.8985	25.2362	19.2526	22.3656	20.4	111.448	56.0826	27.0617	46.5029	24.7394	46.526	60.668	60.038	50.471
ALOX5AP	-2.19575	0.0211712	-1.65991	0.290662	1.32281	0.18	FALSE	FALSE	2.15696	4.73614	3.58036	1.56981	2.5761	0.640554	3.27642	5.50912	0.851555	3.50656	6.83351	2.85647	0.399852	5.1828	1.96166	2.10037	5.64905	4.26985	1.51166	1.76321	8.85413	1.32779	6.52302	3.95529	3.5632	3.85231	5.25337
SLC1A3	-2.60879	0.0215077	-2.90511	0.00372452	-1.11359	0.463008	TRUE	FALSE	4.8492	12.6506	14.0875	2.09305	24.2405	20.2811	4.05082	25.6096	30.0443	7.01303	18.667	16.5036	2.39861	2.36933	4.25014	2.62544	3.56786	8.5396	5.29057	9.69718	11.1361	5.90094	9.19742	9.99793	9.42118	7.85558	11.947
KRTAP1-5	2.13344	0.0218008	4.04231	0.00336495	1.89474	0.435407	TRUE	FALSE	7.7779	3.64572	1.92413	18.0518	1.40856	0.96078	7.208	0.59567	2.06792	1.82346	0.833443	0.63485	15.3905	11.9944	5.23092	3.15051	2.22995	1.18614	7.36897	0.705343	0.63905	4.94205	7.69715	1.53823	4.2879	3.70124	3.13511
C3	-3.20196	0.0218832	-2.85275	0.0376567	1.12241	0.805099	TRUE	FALSE	4.13978	13.2554	11.8098	1.56981	19.9781	5.23047	3.15728	13.5493	4.50065	3.71695	2.33346	2.06304	5.7965	17.5718	13.731	7.52608	27.2043	32.7348	2.64533	4.05524	8.76285	5.38461	18.3295	8.89927	3.32164	3.02144	18.556
FOXQ1	-1.72897	0.0232261	-2.26192	0.00175792	-1.30824	0.289574	TRUE	FALSE	7.1408	12.3462	16.1519	3.13953	12.6577	19.3204	1.54891	15.7827	28.463	9.53769	7.50019	11.3463	5.59663	6.81165	16.3464	5.07576	4.60846	9.72564	3.40112	12.8708	9.4018	10.1053	16.6336	13.5137	18.7215	21.9048	21.0979
MAMDC4	-2.21909	0.0237079	-2.30478	0.0421095	-1.03862	0.792242	TRUE	FALSE	1.42678	3.16614	3.28841	2.87791	4.18842	3.30911	1.42977	7.14694	8.39302	1.05204	3.66681	5.79219	0.399852	1.77703	0.653953	0.175123	1.33801	1.18614	2.0785	1.76321	1.73439	1.77035	2.80496	2.52702	1.63067	2.64377	2.71146
ATP2B2	3.97344	0.0249308	1.55063	0.641058	-2.56247	0.0672048	FALSE	FALSE	4.15603	1.04595	2.68022	1.56981	1.14911	1.28101	10.7226	2.38238	5.83865	2.31437	0.0001	1.42829	3.79774	0.987281	1.30781	0.875214	0.89204	1.42335	7.18002	1.05796	6.57216	3.46684	1.36991	0.87903	3.32164	0.528834	2.71146
GRAMD1C	1.75061	0.0254965	-1.18343	0.784485	-2.07172	0.0136792	FALSE	TRUE	5.07222	2.89741	6.00261	10.7265	1.11204	2.66866	3.99125	4.31798	6.20356	3.64682	1.50012	4.20532	3.99762	1.72767	3.26936	2.97549	1.33801	2.13497	5.47951	7.40515	10.5884	4.20445	3.58771	8.02034	5.55612	2.19057	10.9303
HOTAIRM1	-2.96905	0.0263832	-2.73786	0.0365968	1.08444	0.880908	TRUE	FALSE	0.821486	2.43903	2.24911	1.56981	0.834057	0.854038	0.0596694	0.59567	0.486646	0.561134	1.50012	0.555506	1.19936	1.97446	3.92322	1.75033	4.90577	5.21868	0.377991	7.40515	3.19485	0.147621	1.23946	0.87903	0.905973	1.05757	2.88092
CD300A	-1.8012	0.0264654	-3.09147	0.000288313	-1.71634	0.0764332	TRUE	FALSE	1.68184	3.02933	5.19936	1.56981	2.66403	6.72486	3.63383	2.97795	9.48773	1.54294	3.00013	5.6335	0.599728	1.77703	3.59629	0.350145	1.33801	2.8466	2.64533	4.58418	5.29426	1.18027	2.15266	5.46961	1.93263	5.74064	2.542
MYO1F	-1.52962	0.0265108	-2.03649	0.00379234	-1.33138	0.412963	TRUE	FALSE	3.97988	6.08768	8.105	1.30819	3.96603	4.16305	12.6884	10.4226	12.1638	2.03385	6.66684	4.91941	1.59911	6.46614	3.26936	1.5753	4.90577	10.4373	5.10162	3.52631	10.2233	4.57325	6.32734	10.767	2.95929	6.42044	8.89676
PRODH	-1.84751	0.02738	-4.76735	1.95699e-06	-2.58042	0.000819409	TRUE	TRUE	17.2082	31.7924	82.0378	35.3186	48.0721	95.3205	25.1981	56.2814	150.464	12.2026	28.5004	72.0446	8.39489	18.6578	71.2701	4.37567	11.298	35.3441	20.4062	50.2749	64.8994	14.0146	14.7419	79.4337	17.7552	26.5123	87.5259
SASH3	-2.09226	0.0276491	-1.47942	0.258214	1.41425	0.248719	FALSE	FALSE	2.01652	4.21909	2.98327	0.261719	2.29812	0.854038	1.01278	2.68017	2.06792	3.92734	2.00012	1.98369	2.39861	9.32896	4.904	3.15051	5.79771	7.11635	2.45639	4.76049	1.36928	1.47531	4.69661	1.75796	1.4495	2.19057	3.81295
CD84	-2.08883	0.02822	-1.26395	0.569144	1.65262	0.0920591	FALSE	FALSE	5.48543	11.4581	6.93328	1.56981	4.48495	1.81472	1.13192	10.5715	2.18956	10.6598	13.6669	4.364	9.39427	29.665	8.17326	8.40119	8.77084	18.9767	4.72373	6.34728	5.47682	3.83564	11.2848	3.62569	4.16712	6.87364	10.8455
EBF3	-2.08473	0.0291676	-3.81993	0.000443381	-1.83234	0.0966609	TRUE	FALSE	0.874406	1.8229	3.34016	0.261719	2.46491	2.24169	1.3702	1.34013	2.91938	0.210488	0.500106	0.952225	0.399852	0.888563	2.28858	0.175123	3.56786	3.79543	0.566936	2.29214	7.11983	2.803	3.00065	3.84542	1.20793	0.528834	3.55876
CCL19	-2.09104	0.0298477	-1.11903	0.840857	1.86861	0.0459485	FALSE	FALSE	30.7569	64.3138	34.4179	11.773	47.7399	11.1013	43.5454	57.7704	24.449	33.7323	98.6679	49.3519	13.1919	110.413	14.3849	39.9053	70.0174	76.3812	58.3843	64.1772	48.9254	26.9227	54.9231	31.0924	18.6007	10.8014	19.6575
NOSTRIN	2.24433	0.0303768	-1.40543	0.495098	-3.15424	0.00620481	FALSE	TRUE	7.11167	3.16873	9.99491	9.15676	4.28109	14.6238	12.331	6.40248	3.04101	4.34812	1.16678	3.64991	13.5917	3.89947	8.82711	2.10037	3.86517	4.74427	4.34584	2.64476	25.8319	7.81871	1.95698	3.73555	3.20085	1.1331	15.5057
GAS2	2.17264	0.0311674	2.4894	0.0443751	1.1458	0.869329	TRUE	FALSE	6.23007	2.86751	2.50263	6.01734	0.945252	4.48327	10.6035	4.61577	2.18956	1.33256	0.666774	2.77713	10.1938	6.81165	2.28858	1.75033	2.22995	2.37218	11.3368	1.5869	1.18672	4.49949	4.04431	1.75796	4.10673	2.0395	2.96565
CD69	-2.01033	0.031823	1.13601	0.95927	2.28377	0.028455	FALSE	TRUE	1.69598	3.40949	1.49292	0.784957	3.18767	1.28101	1.78718	4.0202	0.243373	4.62864	3.00013	1.66632	0.399852	4.04754	0.653953	0.525168	1.78398	2.8466	2.45639	0.881653	1.46056	0.811465	6.65349	1.75796	2.1742	3.70124	2.03362
IFITM9P	2.71093	0.0319585	-1.27638	0.854537	-3.46018	0.0472967	FALSE	TRUE	4.64369	1.71295	5.92711	4.77685	7.66265	5.77439	6.66773	0.000100004	1.50693	0.963342	0.200686	0.32867	0.190388	2.07556	1.44962	2.40582	0.220385	0.937906	4.43508	0.0629665	29.8712	12.5394	1.9759	6.45289	5.17088	1.50534	1.09531
TNFRSF21	2.04055	0.0324212	2.8947	0.000804111	1.41859	0.135365	TRUE	FALSE	37.5353	18.3948	12.9669	10.7265	20.3487	13.3429	55.7571	7.89141	1.45974	31.9089	8.00019	7.85513	31.9802	26.3085	15.0387	36.7549	26.6096	22.2977	30.2313	13.2234	20.264	48.7524	24.0045	7.12421	54.1713	20.7718	16.353
CD4	-2.07633	0.0335743	-1.9146	0.146909	1.08447	0.459447	FALSE	FALSE	3.62216	7.5208	6.935	1.04658	2.76143	1.17426	5.6592	4.0202	2.6761	5.04941	6.50017	2.93582	0.99948	10.3162	3.26936	2.80046	11.4467	13.0466	2.0785	4.58418	15.5175	4.94205	13.4373	7.03154	6.4016	7.10025	9.82879
COL6A6	-3.25636	0.0342704	1.47945	0.132379	4.81763	0.000832077	FALSE	TRUE	2.23618	7.28181	1.51149	0.523338	1.27883	0.106842	2.74029	1.9357	0.365009	0.911781	5.50016	0.793537	2.79836	11.4021	4.25014	2.10037	18.8795	1.42335	3.59006	5.64204	3.0123	3.1718	9.91494	1.20863	2.05341	3.70124	0.932131
UBD	-3.52099	0.0345437	1.58673	0.740809	5.58684	0.0164965	FALSE	TRUE	4.6164	16.2543	2.90939	6.01734	68.2734	1.60123	0.655364	13.5493	1.58137	16.3402	11.3336	3.96729	4.39737	21.027	0.980879	2.45042	4.75711	4.03264	4.53479	2.64476	2.28207	1.32779	7.24055	6.37235	1.20793	1.20864	2.45727
MFNG	-1.90713	0.0347699	-2.01633	0.036009	-1.05726	0.987054	TRUE	FALSE	2.11712	4.03762	4.26881	0.784957	2.40931	1.38775	2.32331	3.87131	1.82465	2.66501	1.66679	2.45976	0.939424	5.23216	5.55785	2.80046	8.9195	8.06518	4.1569	3.70262	6.63893	1.69659	3.32679	2.63689	1.57028	3.17251	5.57948
CD3G	-2.22088	0.0386732	-1.42258	0.347347	1.56116	0.232277	FALSE	FALSE	3.26823	7.25835	4.64932	0.523338	2.61317	0.854038	4.40824	11.7626	4.0141	5.2598	8.16686	1.82501	1.07309	13.7713	1.63473	2.2754	6.24368	7.59077	1.32272	3.17369	6.20705	4.94205	10.3715	8.45981	6.34121	1.96397	6.60905
PRDM8	-1.81538	0.0390969	-3.24007	0.00660591	-1.78479	0.440344	TRUE	FALSE	1.14177	2.07275	3.69942	0.523338	2.11279	3.73608	0.178808	2.53127	2.79774	0.911781	1.00011	3.2532	1.59911	1.87575	6.2117	0.350145	2.52726	5.6931	2.83428	2.64476	0.365215	1.77035	2.15267	1.09876	0.966365	1.73737	6.43959
ATP13A4	2.38636	0.0395432	1.35692	0.313396	-1.75866	0.264021	FALSE	FALSE	12.2701	5.14177	9.04261	38.1964	4.76292	13.3782	15.1307	3.87131	4.0141	12.3258	1.50012	4.364	8.39489	6.36741	12.7502	4.55069	4.4598	3.32102	4.91268	10.755	11.3186	7.52366	3.97908	1.75796	7.12629	5.43851	21.4368
HOXA1	-2.67133	0.0395464	-2.05694	0.0942838	1.29869	0.669192	FALSE	FALSE	1.1104	2.96623	2.28402	1.04658	2.72437	2.7754	0.595794	4.31798	3.52756	2.59488	4.00014	1.82501	1.79898	0.937922	0.327026	0.700191	1.93264	2.37218	0.0001	2.11583	4.47275	1.18027	3.84863	0.769164	0.966365	3.85231	2.20308
MMP28	-1.78926	0.0401434	-3.29505	0.00074589	-1.84157	0.106842	TRUE	FALSE	6.35523	11.3711	20.9408	5.4941	10.0447	8.43274	6.31446	8.18919	51.2091	5.82083	5.66683	14.282	0.599728	8.98345	14.7118	3.67558	5.5004	16.3675	5.10162	12.5182	35.9638	8.55631	13.1764	14.6123	15.2792	26.89	11.947
RPTN	2.13655	0.0405281	-2.12168	0.470066	-4.53307	0.00776299	FALSE	TRUE	11.2438	5.26256	23.8556	31.1328	16.9016	28.1801	1.01278	5.21134	6.93338	23.283	2.33346	13.2505	3.99762	3.99818	43.1544	7.87612	4.31114	17.3163	4.72373	9.34456	19.5337	8.26127	0.0001	17.9083	9.66275	0.0001	44.5681
ACSL5	-1.86438	0.0408293	2.08636	0.198823	3.88977	0.00186246	FALSE	TRUE	14.3371	26.7298	6.87181	9.94162	26.3715	3.62934	15.3094	17.5694	10.0959	15.9896	51.1673	4.99876	11.7928	7.05844	8.82711	25.0283	30.1774	1.66056	1.13377	13.9286	3.34678	32.6022	41.3556	11.3163	2.89889	26.2102	11.0997
CYP27A1	-1.3396	0.0408745	1.73884	0.00151922	2.32934	5.82117e-06	FALSE	TRUE	91.5917	122.696	52.6741	56.7715	128.323	32.0227	70.1727	85.0171	35.7612	123.92	129	53.2393	83.1481	119.304	43.4813	116.739	140.777	98.441	55.361	143.868	52.5762	141.106	127.265	55.3724	85.515	108.014	50.4989
SAA1	-2.88066	0.0411153	-1.17839	0.594023	2.44457	0.119254	FALSE	FALSE	18.9577	54.6106	22.3396	8.82576	56.4907	26.1961	20.1591	212.144	6.08965	11.1734	27.2087	8.54579	17.4919	9.08539	1.91877	54.455	61.5894	45.6808	0.944827	20.5393	7.7756	36.8661	37.934	59.3543	1.74527	11.8936	23.1559
LCE1F	2.5656	0.041521	2.50695	0.17772	-1.02339	0.453489	FALSE	FALSE	12.5367	4.88645	5.00076	34.0856	6.25174	6.61812	7.93366	3.30991	6.3376	13.5604	0.500106	5.71285	2.79836	3.75875	3.61342	1.22526	1.04667	3.32102	18.0417	8.99194	2.28631	8.06241	4.64069	6.59208	14.5861	10.5918	5.52469
LCE1C	1.81861	0.0415418	2.29365	0.0300466	1.26121	0.880688	TRUE	FALSE	40.632	22.3424	17.715	89.6406	15.6994	10.7452	34.81	6.71155	13.9874	22.795	4.29218	6.3476	14.1913	11.348	14.2324	13.6519	12.2246	7.81776	44.1649	39.4932	25.5307	40.9839	26.0862	28.1757	64.8182	62.8837	34.8832
DDIT4	-1.62711	0.0419211	1.39214	0.462145	2.26517	0.00781426	FALSE	TRUE	58.7179	95.5405	42.1781	43.6905	60.2489	38.8543	68.9815	111.074	36.856	62.5554	161.335	41.0208	18.3887	34.7982	37.5966	76.135	96.4782	28.2279	24.1851	46.5461	41.7144	133.654	168.944	53.505	42.1534	84.8998	59.6501
KLK5	2.2903	0.0420488	2.7297	0.00470952	1.19185	0.346855	TRUE	FALSE	78.7095	34.3665	28.8345	168.483	32.3389	77.1746	12.5097	18.6117	34.545	99.864	28.167	26.6596	45.9716	19.4969	16.6733	68.084	60.3549	13.2838	35.5218	27.5045	9.67564	66.6801	42.9864	21.3141	132.562	45.4715	31.3503
GREB1	1.70586	0.0421383	-1.30975	0.586428	-2.23425	0.0124406	FALSE	TRUE	2.60768	1.52867	3.41542	4.186	1.946	4.37653	2.68072	3.12684	3.52756	1.12217	0.666774	3.88794	3.19811	0.740486	1.30781	2.2754	1.33801	1.66056	2.26744	0.881653	1.55184	2.65548	1.5656	8.13021	2.47615	1.96397	2.88092
CLDN8	-1.40256	0.045363	-2.07096	0.00074701	-1.47656	0.0958657	TRUE	FALSE	20.1443	28.2536	41.7182	13.8659	26.4461	42.9104	12.3906	31.7143	14.8398	23.283	30.3338	41.1793	45.5719	32.8732	53.6161	19.9527	33.5966	37.2419	10.0142	31.3834	41.2579	25.4474	25.1785	46.6931	10.629	14.5026	56.0067
FGFBP2	1.85522	0.0457236	-2.73243	0.0209481	-5.06925	0.000113224	TRUE	TRUE	5.83943	3.14757	15.9558	3.92438	2.22413	13.5564	3.5147	1.19124	2.31119	10.6598	1.83345	8.01382	9.19439	2.51741	27.7888	2.62544	7.13562	28.7023	5.8574	6.87621	22.911	7.37615	1.89175	5.38355	3.5632	1.51077	18.9796
GDPD5	-2.01635	0.0459222	-1.70852	0.275712	1.18017	0.333692	FALSE	FALSE	1.47171	2.96749	2.51445	1.56981	4.83705	4.37653	0.297947	5.21134	1.45974	1.26243	1.83345	3.33254	0.799604	3.011	3.26936	1.22526	3.4192	3.08381	0.755881	1.93952	0.730329	3.02428	1.82652	0.219833	2.8385	1.66184	3.64349
NLRC3	-2.23255	0.0461257	-1.78862	0.160772	1.2482	0.519893	FALSE	FALSE	1.01037	2.2557	1.80717	0.523338	1.50122	0.320327	0.595794	6.70026	1.58137	1.40269	2.6668	1.11091	0.799604	2.02382	1.30781	0.525168	2.08129	4.74427	2.83428	0.881653	1.278	0.737705	1.43514	1.3185	0.664407	0.755435	2.79619
SLC25A2	-2.33947	0.0475445	-1.97871	0.0217525	1.18232	0.719523	FALSE	FALSE	2.05506	4.80777	4.06637	4.186	2.35371	6.93835	4.88479	18.7606	4.25738	1.47282	6.00017	5.39547	0.599728	1.62895	2.61551	0.700191	1.48667	2.13497	1.32272	2.82107	5.5681	0.737705	2.08744	1.97769	2.53654	3.32357	3.64349
KRT2	-2.46288	0.0477273	-6.51128	0.00011354	-2.64377	0.02005	TRUE	TRUE	52.3134	128.841	340.627	83.2003	31.0096	256.281	2.02645	41.8389	221.622	111.698	43.6808	111.77	65.1596	118.752	423.696	31.8542	126.358	148.018	35.9637	479.565	242.894	22.3556	101.869	262.877	66.2493	87.6574	1057.86
PARVG	-1.54139	0.0477386	-2.15847	0.00211383	-1.40034	0.19095	TRUE	FALSE	5.44703	8.39599	11.7572	4.186	4.72586	7.89903	11.6757	14.8894	13.1368	3.43644	11.1669	9.60069	2.76068	6.87666	4.25014	2.45042	6.09502	17.6101	11.7147	11.8129	12.7084	3.24556	4.50092	12.415	4.10673	7.10025	16.4377
OSR2	2.6793	0.0487948	3.51902	0.0191686	1.31341	0.669298	TRUE	FALSE	5.0133	1.87112	1.42463	2.61629	1.98306	0.747296	0.357517	2.23349	1.82465	6.73251	0.166769	1.2696	5.19687	1.67831	2.61551	2.2754	2.67592	2.13497	6.61319	2.46845	0.730329	6.7123	2.47881	0.549432	9.60234	1.28417	1.52524
EFHC2	-1.68839	0.0489278	-2.47099	0.000678875	-1.46352	0.0832381	TRUE	FALSE	3.18264	5.37353	7.86427	2.09305	1.72361	8.43274	0.595794	8.93365	9.24447	4.20786	4.33348	8.72791	1.99886	3.2578	5.55785	2.2754	4.4598	6.16752	3.59006	9.8735	7.11983	4.05693	3.45725	7.58087	6.64317	6.94918	10.083
IFITM10	2.3079	0.0493603	2.48465	0.0150627	1.07659	0.591239	TRUE	FALSE	40.6232	17.6018	16.3497	135.903	39.4437	38.7244	55.98	13.083	8.8787	25.7719	13.4191	16.4188	11.447	10.9014	18.6349	16.5098	16.429	11.6233	29.8456	16.2016	21.7673	20.1893	10.7384	4.28131	29.3394	20.5984	10.4685
IKZF3	-1.54392	0.0524406	1.42411	0.672917	2.19871	0.0209689	FALSE	TRUE	1.39538	2.15436	0.979826	1.04658	3.52126	0.96078	0.238378	1.63792	0.486646	3.43643	2.33346	1.19026	1.99886	2.12254	0.653953	1.75033	2.67592	1.42335	1.51166	1.93952	1.278	0.516423	2.02221	0.659298	0.664407	0.982036	1.18632
IL27RA	-1.4936	0.0529567	1.36977	0.145389	2.0459	0.00161072	FALSE	TRUE	6.50753	9.71969	4.75082	4.97086	7.85783	3.20237	4.82522	10.4226	4.37901	9.04678	6.33351	5.71285	5.19687	11.9944	7.19248	3.32553	9.66278	5.6931	6.2353	4.9368	4.56403	9.884	9.32788	2.85662	8.5757	17.2217	4.40607
TMC8	-1.71402	0.0561989	-2.45815	0.0174087	-1.43415	0.591423	TRUE	FALSE	0.980703	1.68094	2.41072	1.30819	1.72361	2.0282	0.714933	2.0846	4.25738	1.61307	2.16679	2.30107	0.799604	1.18472	1.96166	0.175123	1.0407	2.60939	1.32272	2.11583	0.63905	0.885226	1.69606	0.659298	1.02676	1.43524	4.82972
TMEM91	-2.07301	0.0563643	1.29848	0.894158	2.69176	0.0427008	FALSE	TRUE	4.54993	9.43208	3.50405	8.89514	10.7489	5.5507	4.2891	19.9517	3.16265	8.90652	14.0003	5.71285	1.79898	1.67831	3.26936	7.00101	13.5278	2.8466	0.377991	3.52631	0.63905	3.98317	7.5667	1.42836	1.14754	4.45658	5.42283
KRTAP21-2	3.47365	0.0570703	8.66291	0.00255003	2.49389	0.187209	TRUE	FALSE	5.80151	1.67015	0.669696	2.61629	0.333683	0.106842	32.4654	3.87131	1.3381	1.75333	0.166769	0.317475	1.79898	5.23216	1.30781	1.05024	0.743383	0.237308	2.26744	0.881653	1.18672	2.95052	0.84808	0.439565	1.50989	1.28417	0.42375
DZANK1	1.70748	0.0574247	-1.33398	0.484915	-2.27775	0.0122152	FALSE	TRUE	2.92614	1.71372	3.90342	4.97086	2.50197	5.12373	3.5147	1.63792	8.27137	1.75333	1.66679	4.36401	1.79898	1.18472	2.61551	1.92535	0.743383	0.948933	3.59006	2.11583	3.8338	3.31932	2.34835	2.08756	2.53654	1.51077	3.98241
LAMB4	-1.6744	0.0579269	-3.59059	0.000150118	-2.1444	0.0206371	TRUE	TRUE	10.1463	16.989	36.4313	1.83143	10.1929	32.0228	7.92284	35.8832	61.4262	5.96109	9.00021	38.8783	1.59911	5.72576	14.3849	6.47594	6.54099	27.7535	9.82526	17.4549	57.4145	19.4729	21.6562	27.7962	28.082	29.458	31.7738
CYP3A5	-1.59637	0.0582176	-3.59643	0.000109249	-2.25289	0.0155699	TRUE	TRUE	29.7131	47.4331	106.861	81.3636	43.3835	118.911	2.38288	47.6457	159.587	35.766	19.167	111.639	11.393	33.1694	135.021	28.7038	27.9475	113.386	22.2956	121.479	44.7267	21.9807	36.5936	55.0432	33.8192	50.0788	116.576
CLEC10A	-2.32979	0.058847	-2.96244	0.0366537	-1.27154	0.821562	TRUE	FALSE	0.996526	2.3217	2.95214	0.523338	0.556071	0.533811	0.953211	5.06245	5.23047	1.26243	1.50012	1.11091	0.0001	1.97446	3.26936	0.350145	1.18935	2.8466	2.0785	1.93952	2.92102	0.811465	3.7834	2.19743	1.99302	2.56824	5.50755
SH3BGR	2.19616	0.059083	-1.28862	0.847723	-2.83001	0.0395518	FALSE	TRUE	4.40651	2.00646	5.67831	0.784957	2.33518	2.88214	7.02929	0.148993	0.243373	7.71432	1.00011	5.71285	9.59414	2.27062	4.904	1.22526	3.27055	14.9442	3.96795	6.6999	4.10764	3.9094	0.326246	3.73555	1.02676	0.0001	8.89676
EN1	1.31927	0.0594948	-3.38328	0.341453	-4.46345	0.00688542	FALSE	TRUE	5.67629	4.3026	19.2045	4.97086	4.35521	14.0901	1.3702	5.06245	12.1637	5.40006	0.666774	7.06169	13.7915	5.23216	34.0004	1.5753	5.35174	26.5674	3.21217	13.7523	13.6006	11.2855	0.0001	6.92168	3.80477	0.0001	39.2301
HIST1H2BK	-1.5353	0.0614665	1.55551	0.199922	2.38818	0.00307998	FALSE	TRUE	14.152	21.7275	9.09796	4.47233	8.71911	7.89212	21.1066	26.9935	9.12602	18.8937	39.8666	6.83482	8.1201	12.7548	7.55662	15.6037	22.1869	8.56188	7.57809	12.5406	9.33153	26.6656	32.2987	12.0298	10.776	18.46	11.4509
TMEM132B	-2.03931	0.0614968	-5.22827	2.66368e-05	-2.56374	0.00402937	TRUE	TRUE	1.72259	3.5129	9.00619	1.83143	2.50197	6.93835	2.26374	6.10469	11.1907	0.98191	1.16678	7.85513	1.99886	4.39306	23.2119	1.92535	1.78398	7.35356	2.83428	8.2867	7.21111	1.40155	1.82652	2.52702	0.543624	2.0395	5.76175
CCDC129	2.05346	0.0615574	-1.6064	0.141202	-3.29868	0.00186188	FALSE	TRUE	9.28774	4.52298	14.9199	18.3134	7.33892	14.7305	19.5985	3.98892	13.5017	10.1688	1.50012	9.442	7.99514	5.23216	25.1734	2.80046	5.20308	6.16752	2.26744	11.1077	24.0065	10.6216	1.43514	5.49341	2.53654	0.377767	20.8438
SCGB2A1	1.86774	0.0625505	-1.3761	0.457334	-2.5702	0.0121126	FALSE	TRUE	13.8124	7.39524	19.0072	1.83143	5.46715	10.2474	9.23336	0.744563	2.31119	38.6413	0.833443	3.64991	18.7884	6.41678	29.4235	3.32553	7.8789	12.0977	7.55791	37.378	48.5603	30.0944	0.0653292	14.5025	1.02676	0.377767	31.2655
SPRR1A	5.75353	0.063026	3.96963	0.00816845	-1.44939	0.362964	TRUE	FALSE	30.6181	5.32162	7.71309	175.821	9.70759	39.1526	19.7531	4.98408	3.64919	11.0911	8.33353	6.18891	6.79588	3.55686	0.653953	6.82599	5.79771	1.42335	10.9589	4.25459	0.463567	4.94205	2.61501	7.80061	8.75687	3.32357	2.37254
CCDC88B	-1.88399	0.0640443	-2.35066	0.00952905	-1.24771	0.392889	TRUE	FALSE	1.63168	3.07405	3.83551	2.35467	2.89115	3.62934	5.42092	10.4226	8.0281	1.40269	3.50014	3.96729	0.199976	1.43151	0.980879	0.700191	1.18935	2.37218	0.566936	1.5869	3.92508	1.62283	1.30468	5.49341	0.78519	2.2661	2.28781
ATP8B4	-1.69662	0.0642481	-2.11139	0.0261984	-1.24446	0.673141	TRUE	FALSE	0.995408	1.68883	2.10169	0.784957	1.13058	1.38775	0.536225	3.27574	0.973192	0.631264	1.50012	1.2696	1.19936	1.43151	0.653953	0.700191	1.48667	3.08381	2.0785	1.41059	2.5559	0.885226	2.21789	3.07636	1.14754	1.05757	3.81295
TRPC6	-1.73773	0.0647445	-2.36642	0.0311344	-1.36179	0.728186	TRUE	FALSE	1.51111	2.62591	3.57593	0.0001	0.685798	1.81472	0.0596694	3.09892	7.54156	1.40269	2.00012	3.96729	2.99824	3.20844	2.94244	2.80046	2.82458	3.08381	1.88955	1.76321	3.92508	1.54907	4.63138	2.19743	1.38911	2.79484	3.13511
TSPAN32	-1.79497	0.0648755	-2.78632	0.0126443	-1.55229	0.457529	TRUE	FALSE	1.09126	1.95879	3.04061	0.784957	1.40856	0.533811	1.42977	1.19124	2.55447	1.28044	2.54022	1.42829	0.478582	2.12254	5.23092	0.525168	0.89204	5.21868	1.88955	2.99738	5.29426	0.590184	2.47881	1.09876	1.75145	2.0395	2.96565
MANEAL	-1.84337	0.0649682	1.37001	0.695542	2.52543	0.0283777	FALSE	TRUE	3.16871	5.8411	2.31291	3.40115	4.15135	1.06752	3.39556	6.55137	0.973192	3.36631	11.6669	1.74566	0.99948	0.839204	1.63473	3.50055	4.4598	1.66056	0.566936	5.28942	4.38147	8.85136	8.93651	3.73555	1.26832	4.83424	3.30457
GPD1	-1.60091	0.0672002	2.63681	0.657538	4.22131	0.0262385	FALSE	TRUE	43.8352	70.1765	16.6243	17.2669	130.58	16.4384	148.864	36.7766	6.56847	60.7316	123.836	16.3449	9.79402	17.5719	9.48096	40.4304	87.5593	26.5675	0.944827	12.8708	8.03262	68.966	113.695	25.1594	3.68399	38.5221	24.4023
PDE4DIP	-1.45431	0.0681843	-2.15085	0.00055565	-1.47895	0.0513829	TRUE	FALSE	23.7722	34.572	51.1303	36.1035	51.3905	46.006	31.0954	41.9878	71.7656	18.4441	29.3338	80.1373	11.1932	20.5335	34.0004	10.8515	15.7577	55.744	35.7108	53.4222	33.7732	26.1851	29.0271	40.7605	20.5936	35.1232	46.8558
NFE2L3	-1.39572	0.0686419	1.91774	0.114747	2.67662	0.00160024	FALSE	TRUE	6.2172	8.67743	3.24194	9.36208	7.29957	3.54723	1.42977	7.89141	4.86556	10.5195	10.4561	3.17385	6.99576	10.4014	2.61551	4.55069	7.28427	1.42335	1.13377	5.11311	2.00823	9.22016	12.5893	4.06515	6.52584	8.38432	4.23661
ESRRG	1.84204	0.0691232	3.27187	0.0100766	1.77622	0.385156	TRUE	FALSE	2.87542	1.56099	0.87883	0.784957	0.426345	0.96078	3.99125	3.27574	1.70301	0.771522	0.166769	0.476162	3.42495	1.48087	0.327026	2.2754	1.63532	1.18614	5.10139	0.881653	0.456493	4.05693	3.26156	0.988897	2.59694	1.3597	0.932131
C11orf21	-1.61385	0.072142	-2.28827	0.00348182	-1.4179	0.189983	TRUE	FALSE	1.56815	2.53076	3.58835	0.523338	1.81627	4.37653	2.79986	0.893455	2.6761	2.71713	5.96007	5.0781	0.321122	2.46805	2.94244	0.525168	3.27055	4.03264	2.83428	2.11583	3.37741	1.25403	1.30468	1.64809	1.57028	2.41717	4.57553
ADD2	-2.20177	0.0723554	-3.89942	0.0164239	-1.77104	0.493105	TRUE	FALSE	1.02211	2.25044	3.98561	2.61629	1.92747	3.73608	0.655364	1.63792	4.86556	1.75333	1.16678	3.8086	0.799604	2.22126	10.4617	1.22526	3.71652	2.60939	0.0001	5.46573	3.01701	0.885226	1.5656	1.09876	0.241666	0.302234	2.28781
SAMSN1	-2.33537	0.0723796	-1.08087	0.697402	2.16063	0.0321086	FALSE	TRUE	1.67847	3.91985	1.81421	0.261719	1.24177	0.106842	3.63384	6.70027	0.365009	2.03385	3.00013	0.238131	0.199976	6.91037	0.327026	1.92535	2.67592	3.55823	2.0785	1.76321	3.37741	0.516423	7.63192	3.40596	2.77811	1.43524	3.13511
ATP6V1C2	1.7086	0.0735058	-1.80345	0.0283065	-3.08138	0.00029653	FALSE	TRUE	4.78073	2.79804	8.62182	10.2032	3.09501	7.68554	6.37403	2.38238	11.4339	7.15329	1.50012	4.44335	5.99638	2.71485	11.7694	2.10037	2.67592	8.5396	2.0785	8.11039	11.3187	2.28667	0.84808	3.95529	2.05341	1.05757	9.82879
ARHGAP15	-1.49829	0.0735083	-2.24245	0.00165669	-1.49667	0.110402	TRUE	FALSE	2.92224	4.37836	6.55297	2.35467	2.66876	4.05631	2.26374	7.59362	3.04101	3.08579	5.50016	3.49122	2.79836	5.03472	7.19248	2.2754	3.56786	9.01402	5.8574	3.17369	8.67157	2.50796	4.24	5.60328	2.23459	3.24804	11.3539
RP11-529K1.2	2.25343	0.0749654	1.04428	0.64208	-2.15787	0.0282341	FALSE	TRUE	6.42009	2.84903	6.14783	4.44762	3.83673	4.40127	14.3584	2.53278	12.9018	1.26243	1.50235	4.43413	15.0307	2.30708	3.59629	5.3055	0.594727	3.07523	5.09214	4.16721	5.32582	1.49905	3.0855	10.2283	4.36487	4.7659	5.21981
MMP7	1.15864	0.0763169	-3.13379	0.0801728	-3.63094	0.00113545	FALSE	TRUE	93.8836	81.0289	294.212	161.68	98.8337	184.876	112.407	38.4145	140.611	147.551	29.3338	215.343	146.31	91.1161	534.193	21.3529	39.5429	335.647	25.8857	349.974	268.549	84.9722	0.261017	230.059	50.9098	0.755435	444.414
ASPRV1	2.17191	0.0768977	2.67971	0.0226127	1.2338	0.564218	TRUE	FALSE	47.4989	21.8697	17.7254	59.126	12.9357	13.7699	37.8267	19.2072	20.5567	46.3556	8.83353	8.80725	8.39489	7.45332	3.92322	15.2271	14.4198	5.93031	34.3881	19.5706	26.836	27.5128	27.2007	26.4779	151.16	65.3366	35.502
TKT	-1.71581	0.0776543	1.63756	0.316589	2.80975	0.0083674	FALSE	TRUE	81.1461	139.231	49.5529	28.7782	117.236	63.7252	16.5604	124.623	31.9905	125.881	272.503	68.2357	60.9623	40.8694	33.0197	126.717	144.643	35.3441	29.0977	36.849	14.696	174.812	200.906	56.801	86.36	176.22	92.6112
SEMA6B	-1.71883	0.0776573	-2.3166	0.0112617	-1.34778	0.37905	TRUE	FALSE	1.50681	2.58994	3.49066	0.261719	2.27958	2.45517	1.13192	1.63792	3.16265	0.841652	0.666774	2.5391	1.19936	3.40588	9.48096	1.5753	4.60846	2.60939	2.45639	2.64476	2.5559	2.65548	3.58771	1.64809	1.93263	1.88844	3.47403
SHROOM4	-1.4805	0.0798111	-2.95522	1.28911e-05	-1.9961	0.00144318	TRUE	FALSE	3.65776	5.41531	10.8095	3.66277	5.41156	10.6743	5.48049	10.5715	18.2456	4.5585	2.83347	11.4256	3.79774	4.0969	12.7502	3.15051	4.4598	9.96285	2.0785	6.6999	11.1361	3.39308	4.56615	5.16382	3.14046	4.68318	7.11743
HIST1H2AL	-1.55828	0.0812259	1.73219	0.0782403	2.69924	0.00119294	FALSE	TRUE	13.7077	21.3605	7.91351	13.8659	21.6796	17.2227	3.35811	50.5002	5.2591	19.163	20.3451	6.53654	10.5229	16.7185	6.8834	7.21069	12.8465	5.26377	11.168	9.01644	6.58698	19.1489	25.5824	9.38477	25.2242	14.1949	6.17086
GPR132	-1.94357	0.0812538	-6.73842	0.00014552	-3.46703	0.0136357	TRUE	TRUE	0.619625	1.20428	4.17529	0.523338	1.8904	3.41585	0.953211	1.04235	12.1638	0.631264	0.666774	6.03023	0.199976	1.28344	1.96166	0.350145	0.594727	5.21868	0.755881	2.29214	0.456493	0.516423	1.109	1.86783	1.02676	0.755435	2.28781
LRG1	-2.20038	0.0825264	2.16902	0.110987	4.77265	0.00193665	FALSE	TRUE	8.09756	17.8177	3.73328	12.0346	20.6068	6.19115	8.816	37.967	6.56847	8.97376	25.4369	2.22172	1.19936	1.72767	1.63473	8.92626	15.9064	2.60939	2.45639	4.58418	2.37334	15.4898	22.1121	3.18622	6.88431	14.2004	5.08124
LAMP3	-1.6661	0.0825389	1.45675	0.274071	2.42709	0.00716999	FALSE	TRUE	9.48444	15.802	6.51069	2.09305	10.8045	4.59002	4.34867	5.36023	4.37901	15.4987	27.5004	4.28466	8.99452	32.7252	6.2117	11.3766	11.744	11.3861	9.82526	11.6366	11.5012	12.6869	17.8077	4.39475	11.0518	8.83752	5.3381
CARD18	1.58361	0.0840423	2.81856	0.000330901	1.77983	0.0267225	TRUE	FALSE	139.558	88.1265	49.514	94.1829	41.3829	13.4496	106.987	26.3541	30.7741	109.823	83.3344	28.5638	116.128	134.997	37.2697	302.964	138.102	89.6648	193.858	141.225	25.9232	78.2603	59.0978	129.203	114.261	80.5188	41.2637
INSIG1	-1.79763	0.0843676	2.46541	0.265064	4.43189	0.00699361	FALSE	TRUE	45.9289	82.563	18.6293	28.2549	34.9449	21.2865	11.1396	58.8127	7.41993	107.436	173.991	21.899	26.3837	13.1296	16.3464	46.0311	69.5714	4.50706	3.59006	20.4522	6.20704	137.711	163.008	23.072	6.88474	126.594	48.2963
CLEC3B	2.29854	0.0848467	-1.72336	0.248456	-3.96121	0.0063751	FALSE	TRUE	74.9704	32.6165	129.201	14.6508	39.9738	23.27	165.659	19.6539	96.7003	21.8805	5.00016	16.0275	75.7533	27.2957	122.925	39.9054	95.7348	165.571	184.22	37.5543	343.215	66.5322	22.0476	82.2894	31.1622	13.6717	183.607
RRN3P2	-1.41932	0.0854875	-2.10141	0.00739794	-1.48057	0.27196	TRUE	FALSE	6.87049	9.75144	14.4377	7.06381	11.959	11.5317	1.3702	12.8716	10.3392	12.5	8.66686	22.3769	4.1975	14.6104	19.2887	9.62634	8.32487	21.3488	12.2815	10.0498	6.1144	4.72077	6.39257	5.38355	3.20376	5.13638	19.1182
SPRR1B	5.8703	0.0856695	7.85594	0.00425821	1.33825	0.188058	TRUE	FALSE	240.057	40.8935	30.5574	1437.32	57.4169	104.096	28.4983	45.6396	21.2865	130.29	31.5005	26.3422	19.3881	54.539	20.2695	43.2307	51.7326	13.0466	90.127	27.1289	5.28719	56.1318	25.9556	37.3546	115.469	33.2348	16.7767
COLEC12	1.54831	0.0863901	-1.7107	0.0554798	-2.64869	0.000834239	FALSE	TRUE	13.6194	8.7963	23.2987	4.186	6.4679	20.1744	29.6061	9.38033	20.5567	8.626	1.83345	8.96594	16.19	6.71293	26.1542	9.80137	22.2986	30.3628	10.77	6.6999	43.4487	15.3423	12.0675	14.6123	14.4337	4.90978	22.1147
CACNB4	1.79201	0.0869654	2.10458	0.0143861	1.17443	0.404445	TRUE	FALSE	34.0301	18.99	16.1695	67.7592	17.1242	16.9721	10.7226	33.3519	27.6115	30.9272	10.3336	24.4379	19.3881	10.3655	16.3464	21.1779	8.62218	15.1814	55.172	19.3943	2.73846	30.3157	21.0039	20.9845	36.7785	31.7242	5.08391
BMP8B	1.80484	0.0875179	-2.22812	0.0684387	-4.02141	0.00110726	FALSE	TRUE	1.20248	0.666255	2.67928	1.30819	0.624457	1.28101	1.90632	0.450306	6.56847	1.1923	0.833443	1.82501	0.799604	0.246895	1.96166	0.350145	1.63532	1.18614	2.45639	0.176411	5.38554	0.761341	0.456705	0.769164	0.845582	0.906502	2.45727
CEACAM5	-1.38554	0.0901022	-5.77943	0.244503	-4.17126	0.00670587	FALSE	TRUE	2.58765	3.58528	14.9551	2.35467	4.39228	10.9945	2.32331	3.57352	9.00121	4.48837	0.500106	9.44202	3.79774	2.96164	27.4619	1.75033	2.97323	16.6047	1.70061	14.2813	17.4344	2.65548	0.0001	1.75796	1.63067	0.0001	26.9443
CSTB	-1.59718	0.0901153	1.33883	0.231649	2.13835	0.00618097	FALSE	TRUE	153.761	245.585	114.847	172.145	196.684	141.434	151.187	367.02	135.503	204.848	455.172	99.7352	69.7568	89.7843	44.789	107.639	158.765	70.451	82.7581	117.07	95.5688	232.198	297.837	182.598	209.559	282.344	148.701
NMRK1	-1.44142	0.094037	-2.0572	0.0019149	-1.4272	0.0968917	TRUE	FALSE	21.9302	31.6108	45.1149	13.081	15.5673	21.562	27.7595	56.5793	70.9142	22.7921	35.8338	29.6747	17.3893	25.3213	42.5005	12.6017	21.258	39.6139	20.973	24.1547	31.1261	23.1609	31.5711	49.4399	37.6844	42.601	76.0877
LNX1	1.37016	0.0940422	-1.74471	0.0236862	-2.39054	0.000334274	FALSE	TRUE	22.4344	16.3735	39.1415	32.1792	18.1618	44.7251	27.3426	19.505	34.6666	27.2103	7.83352	24.676	25.3843	16.0419	64.7317	16.9773	16.2037	43.8837	15.1157	34.7334	46.6437	23.9724	6.19688	15.9307	11.2933	12.3121	37.8747
PAK3	-1.72554	0.0944888	1.22333	0.577209	2.1109	0.0298478	FALSE	TRUE	1.24119	2.14172	1.0146	1.04658	1.46416	0.320327	1.3702	3.42463	0.729919	0.701393	0.833443	1.90435	2.19874	3.10972	1.63473	2.62544	3.86517	2.13497	0.189045	1.5869	0.63905	0.590184	1.5656	0.329699	1.20793	1.28417	0.42375
CFTR	1.60327	0.0958738	-2.34346	0.276955	-3.7572	0.00877512	FALSE	TRUE	3.21767	2.00694	7.54048	4.97086	2.5205	12.4889	1.66804	2.0846	2.6761	2.73514	0.500106	7.53776	8.99452	1.33279	9.48097	0.525168	2.67592	4.26985	1.13377	6.87621	9.49308	4.86829	0.0653292	3.95529	0.845582	0.0001	10.4219
FGF22	3.04215	0.0973775	3.93951	0.0162568	1.29498	0.401259	TRUE	FALSE	7.14171	2.34759	1.81284	30.0863	3.18767	1.70798	5.36135	2.38238	3.28428	6.10135	1.16678	2.61844	0.599728	0.987281	1.96166	2.62544	2.22995	0.474517	4.91268	4.40787	0.730329	2.4342	2.15266	1.09876	5.0126	2.2661	2.62673
BCAS1	2.00588	0.0985883	-2.46007	0.0488411	-4.93461	0.00084979	TRUE	TRUE	5.25729	2.62094	12.9333	14.1275	6.15286	16.8654	5.54006	2.23349	4.62229	6.03122	1.66679	6.18891	6.79588	2.81357	17.3272	1.40028	2.37861	10.2001	2.45639	5.28942	35.4162	5.16333	0.130558	6.15261	0.543624	0.302234	6.69378
ITGAL	-1.82505	0.10117	-2.09358	0.0216285	-1.14714	0.461767	TRUE	FALSE	1.43136	2.61231	2.99668	0.261719	2.65023	1.60123	4.70609	4.31798	4.74392	1.61307	3.33347	1.90435	0.399852	2.41869	2.28858	0.700191	0.594727	1.66056	1.13377	0.352721	5.1117	1.54907	3.00065	2.08756	1.08715	4.22998	4.57553
RPL29P19	1.70818	0.101554	-1.19895	0.60316	-2.04801	0.0351954	FALSE	TRUE	2.56195	1.49981	3.07164	2.12288	2.03886	1.49478	3.51479	1.78706	5.23047	1.26279	1.50012	2.85678	5.7965	2.61617	6.53863	1.40028	0.44607	2.8466	3.21217	1.23427	1.18672	1.91787	1.69606	1.53823	1.26832	0.679901	2.88092
SYT8	-2.21106	0.10383	-8.62812	7.34586e-05	-3.90225	0.00540684	TRUE	TRUE	2.57572	5.69507	22.2236	4.97847	10.4524	25.9384	0.297947	9.23144	30.166	2.52476	0.833443	19.598	3.99762	1.9251	27.4619	2.2754	5.64905	18.5023	0.755881	10.0498	38.3406	2.87676	5.15321	1.42836	2.89889	2.2661	16.353
CCL28	1.67427	0.104504	-1.28643	0.593533	-2.15384	0.035283	FALSE	TRUE	32.7759	19.5762	42.164	57.5563	47.2196	67.9948	35.0269	18.165	14.8398	57.8572	6.50017	16.5829	48.7698	12.4386	44.1352	5.4258	13.3792	57.4045	2.26744	58.7115	58.5097	50.2309	0.195788	34.7178	5.07299	0.0001	43.1274
LGALS3BP	-1.37123	0.105257	1.47463	0.225076	2.02205	0.00720914	FALSE	TRUE	50.6608	69.4674	34.355	29.3014	99.7993	28.5002	91.0826	47.348	21.2865	46.2855	93.835	21.9783	23.9452	48.2238	30.0773	40.2553	56.9357	38.4278	17.9499	28.7387	54.95	78.2592	93.9962	36.9152	78.2074	86.8629	42.7043
ZSCAN31	1.4636	0.105824	2.05167	0.000855259	1.4018	0.0453964	TRUE	FALSE	33.0451	22.5779	16.1064	30.3479	16.9572	5.23047	22.7557	17.1227	13.5018	40.7452	18.8337	20.5501	27.3831	26.8021	32.3658	33.7796	23.4879	17.7907	49.8818	33.8517	6.20705	17.5551	16.8293	13.2939	41.912	26.7389	19.9117
RP11-631M6.2	2.08425	0.107768	-1.24318	0.321127	-2.5911	0.0127999	FALSE	TRUE	100.533	48.2345	124.98	117.221	59.2208	55.0581	210.732	54.319	190.108	35.0197	44.9027	70.7522	81.7841	41.0152	46.2037	46.2953	29.0368	127.36	238.413	79.0451	75.3574	30.9976	36.1543	327.766	43.7994	42.1823	107.238
CLDN11	1.59477	0.109343	-1.54707	0.379974	-2.46722	0.0170919	FALSE	TRUE	1.17165	0.73468	1.81261	1.83143	1.14911	2.34843	0.595794	0.59567	0.851555	1.33256	0.833443	0.63485	0.799604	0.394973	1.63473	1.05024	1.18935	1.89777	1.13377	0.705343	3.19485	1.18027	0.782851	0.549432	1.4495	0.2267	3.3893
ZNF569	-1.30713	0.109711	-2.26039	0.000130279	-1.72927	0.00853252	TRUE	FALSE	10.8043	14.1227	24.422	9.41838	20.6637	29.034	6.25489	18.3139	33.0852	11.0805	14.8336	21.0262	16.3899	10.711	12.4233	5.77585	10.2574	21.3488	16.4383	11.9892	14.6047	9.66272	14.8071	29.1147	11.4141	11.4057	34.7394
COL16A1	-1.45839	0.109824	-2.21152	0.00233604	-1.51642	0.0963091	TRUE	FALSE	99.2625	144.763	219.521	82.4099	244.489	226.187	37.5884	108.543	278.791	87.6617	74.0009	362.525	105.535	217.138	271.349	102.563	91.5726	267.097	170.05	142.635	78.1346	104.297	110.303	104.153	103.995	169.422	167.932
CCDC136	2.11676	0.110529	2.81128	0.0315836	1.32811	0.539354	TRUE	FALSE	2.35076	1.11055	0.836189	0.523338	0.426345	1.06752	4.05083	1.34013	0.486646	0.561134	0.833443	0.793537	1.61446	2.56677	0.980879	1.40028	0.44607	0.237308	6.23529	1.41058	1.278	2.06539	0.652392	0.659298	2.35537	1.20864	1.18632
ATP6V1B1	1.76346	0.111164	-2.45049	0.0647048	-4.32136	0.00142186	FALSE	TRUE	43.5461	24.6935	106.71	111.188	45.4045	188.401	60.7609	34.6921	56.5608	48.5997	5.8335	62.6817	64.7599	23.3963	156.925	4.55069	16.2037	95.595	8.31369	71.0533	145.133	42.7075	0.587163	29.3344	7.48865	0.377767	119.046
CHI3L1	-1.4824	0.111302	2.92741	0.00536034	4.33959	8.02065e-05	TRUE	TRUE	426.894	632.827	145.826	288.304	249.798	99.0569	426.577	328.01	131.246	597.502	673.341	137.344	373.768	302.176	72.2508	857.611	1189.4	123.348	99.3853	955.956	88.5404	676.826	851.437	235.553	95.1772	512.495	279.271
KRTDAP	2.87887	0.11294	5.01626	0.00250198	1.74244	0.0985974	TRUE	FALSE	456.203	158.466	90.9448	1929.04	255.671	148.266	48.9658	80.9972	45.9786	485.883	58.334	69.4253	142.111	192.349	227.539	203.901	170.211	66.8929	282.097	170.491	43.0835	124.951	109.521	46.4734	432.679	230.156	79.8998
CCL2	-1.78729	0.113686	-2.61117	0.00455921	-1.46097	0.15257	TRUE	FALSE	19.4185	34.7065	50.7052	12.5578	39.2702	59.4555	34.9078	84.5706	79.672	29.6648	56.5007	49.0345	14.3912	26.3085	21.9042	6.1259	9.51412	26.093	13.0373	13.7523	87.5364	28.1766	22.9608	64.4916	16.487	24.7751	17.4545
DNAH11	-1.50787	0.113816	-4.9513	0.00777555	-3.28364	0.22134	TRUE	FALSE	1.70229	2.56683	8.42854	2.61629	2.61316	4.48327	3.63384	3.12684	9.73102	1.89359	3.66681	9.44201	0.0001	3.99818	8.17326	1.75033	0.89204	18.9768	2.26744	3.35	5.20298	1.21503	0.84808	7.69074	0.241666	2.0395	3.72822
HSD17B13	-1.99377	0.114007	-9.52796	0.00259555	-4.77886	0.100408	TRUE	FALSE	0.855061	1.7048	8.14699	0.0001	2.50197	1.60123	2.08503	0.148993	8.75793	0.841652	0.833443	4.52269	2.19873	0.641768	5.55785	0.175123	0.44607	3.79543	0.566936	2.29214	31.0348	0.368902	2.54404	6.26248	0.604015	4.22998	3.64349
EFNB2	-1.24584	0.11543	1.69852	0.251163	2.11608	0.00955537	FALSE	TRUE	76.9474	95.8641	45.3027	24.069	58.5624	28.7138	12.5097	69.2351	33.9367	110.313	125.168	59.1905	120.725	105.382	56.8853	142.994	143.305	73.5347	46.8585	92.5632	27.5662	107.985	102.149	36.5856	50.1251	70.5484	46.0085
TMPRSS2	1.45319	0.11576	-1.65437	0.429141	-2.40411	0.0224241	FALSE	TRUE	14.137	9.7283	23.3879	10.7265	13.3434	20.9216	14.0585	6.25358	8.87956	15.5688	0.833443	6.74432	43.3733	15.9431	56.8854	7.52607	13.3792	16.3675	1.13377	27.8572	34.2295	16.965	0.0653292	3.84542	3.74437	0.151167	39.23
SOD3	-1.87599	0.1161	-2.84073	0.0241855	-1.51426	0.44783	TRUE	FALSE	1.04549	1.96134	2.96997	0.261719	2.59463	0.533811	1.3702	3.87131	2.79774	0.140359	0.500106	0.63485	1.19936	1.67831	5.55785	1.5753	2.67592	4.50706	1.13377	1.93952	2.92102	1.47531	1.82652	1.97769	1.20793	0.604368	4.82971
RUNX2	-1.27877	0.116702	-2.35901	0.000617813	-1.84475	0.0309833	TRUE	FALSE	2.36949	3.03003	5.58965	2.35467	3.24327	7.68554	3.81255	2.68017	2.91938	2.05868	2.16679	3.33254	4.39737	2.56677	7.84633	0.875214	3.71652	5.93031	0.566936	3.87893	5.93321	1.99163	2.73973	5.05396	2.8989	3.24804	6.01594
AGPAT4	-2.86082	0.116965	-3.07151	0.0351335	-1.07365	0.551637	TRUE	FALSE	1.10115	3.15019	3.38219	1.30819	0.667266	1.60123	0.297947	14.7405	6.69011	0.701393	1.33345	5.47482	0.99948	1.43151	0.327026	1.05024	1.48667	3.32102	0.755881	1.5869	1.73439	2.06539	2.21789	1.97769	1.63067	1.73737	5.93121
MEGF6	-1.54551	0.117008	-2.03651	0.0134241	-1.31769	0.310059	TRUE	FALSE	13.4237	20.7465	27.3375	9.68	26.1119	13.6631	27.9978	44.37	70.6709	2.8754	7.00018	23.5654	6.79588	12.7347	16.6733	6.82598	8.91949	26.3302	17.0052	17.9838	25.2842	17.8501	20.6778	21.7536	18.3592	28.1741	20.7589
CNTN4	1.80579	0.117418	2.22618	0.0421868	1.2328	0.608178	TRUE	FALSE	33.1859	18.3775	14.9071	3.92438	9.02533	9.28668	51.7655	14.7405	12.5287	16.6207	10.5002	25.8662	47.5705	46.0031	14.7118	43.2306	17.8389	24.6697	49.1258	14.2813	8.76285	32.8974	23.6783	15.3814	20.3521	10.9524	8.04946
KIAA0355	-1.60191	0.117691	-2.10416	0.0115077	-1.31353	0.279329	TRUE	FALSE	3.11394	4.98827	6.55225	2.87791	2.68729	6.93835	5.0635	14.2938	12.8936	1.89359	3.33347	4.91941	0.599728	1.67831	2.61551	1.40028	3.27055	3.32102	1.70061	4.9368	8.21518	6.78606	5.02275	6.48222	4.58986	4.68318	7.0327
TMEM14E	-1.63023	0.119112	-2.65916	0.00147057	-1.63116	0.0616396	TRUE	FALSE	23.0932	37.6471	61.4086	32.7025	36.0085	58.7083	12.0927	101.247	136.963	31.1375	37.8339	72.5203	10.7934	19.2008	34.9812	14.352	15.7577	50.2883	27.0193	32.9702	17.7994	27.6603	31.5711	63.8324	28.988	26.5879	56.1762
P2RX6	-1.3072	0.119279	-2.55556	0.0271634	-1.95499	0.470316	TRUE	FALSE	1.17381	1.5344	2.99973	0.784957	1.59388	4.16305	4.16996	2.97795	3.77083	0.631264	1.83345	4.91941	0.0001	0.839204	3.26936	0.700191	1.33801	2.13497	0.755881	1.23427	2.00823	0.958986	1.17423	1.86783	1.38911	1.28417	1.86416
GALNT5	2.21692	0.119502	2.66113	0.0455111	1.20037	0.626629	TRUE	FALSE	4.72753	2.13248	1.77652	0.261719	1.35296	1.92146	4.11039	1.19124	1.3381	7.50394	1.50012	1.58697	5.99638	4.73857	1.96166	4.20065	1.33801	2.60939	2.83428	2.99738	2.82974	6.26974	1.82652	0.439565	6.64317	2.11504	1.52524
WDR72	1.5543	0.119751	-3.72191	0.00631095	-5.78497	0.000106095	TRUE	TRUE	14.2474	9.16643	53.0276	32.9641	15.2152	61.1634	7.14843	6.55137	37.9507	28.683	2.50013	66.1728	18.7884	11.0565	80.0971	2.97549	7.8789	32.4976	7.74686	28.7387	42.0796	12.8344	1.23946	23.5115	2.8385	0.151167	80.7479
STAT1	-1.55892	0.120971	1.65118	0.3471	2.57407	0.0167238	FALSE	TRUE	93.3636	145.546	56.5434	179.471	436.709	59.776	9.70992	161.848	46.7085	200.215	98.3345	84.7379	67.9579	147.437	79.4432	70.7095	73.5851	67.3673	55.9279	74.0506	20.4465	83.2015	92.0399	31.4219	79.716	80.3667	62.4457
FAM213A	-1.38683	0.121321	1.54159	0.110241	2.13793	0.00319555	FALSE	TRUE	598.293	829.733	388.1	395.211	868.768	330.078	327.962	614.2	548.427	755.702	1459.13	447.511	514.577	356.759	312.235	1341.04	1108.07	331.197	327.483	589.844	145.008	777.949	1088.11	529.7	346.422	552.981	460.644
CDC14B	-1.3708	0.122566	-2.28182	0.0475385	-1.66459	0.631584	TRUE	FALSE	1.1229	1.53927	2.56225	0.523338	1.00085	1.06752	0.476656	2.23349	3.40592	0.911781	1.16678	1.03157	2.79836	0.937922	1.96166	0.0001	1.33801	3.32102	1.13377	1.41059	1.91695	1.99163	2.41358	4.06515	1.14754	1.8129	3.72822
FMO1	-1.46007	0.123222	-3.49759	0.0201832	-2.39549	0.384561	TRUE	FALSE	1.37812	2.01215	4.82009	0.0001	1.77921	1.92146	0.893641	1.78681	5.83865	1.47281	1.00011	3.64991	0.599728	1.48087	2.61551	0.875214	2.52726	9.48843	3.21217	1.05796	3.10357	1.91787	3.06588	8.13021	2.05341	3.39911	3.81296
HIF3A	-1.52097	0.123517	-3.20929	0.000104814	-2.11004	0.00599079	TRUE	TRUE	3.26488	4.96577	10.4779	3.66277	3.68805	10.7811	2.79986	5.9558	10.2176	4.27799	4.50015	8.17251	2.79836	3.85011	5.88477	3.15051	3.86517	12.8093	4.34584	11.4603	13.6919	4.05693	3.91386	3.62569	1.02676	2.49271	18.6407
GABRP	1.37085	0.124063	-1.50397	0.278916	-2.06173	0.0122785	FALSE	TRUE	10.8269	7.89792	16.2833	15.9589	14.6406	27.4328	8.5781	16.825	8.51466	20.8986	2.00012	11.8223	11.393	3.20844	10.1348	2.27539	3.86517	27.2791	2.83428	20.6285	8.85414	14.5309	1.109	7.25128	10.1459	0.906502	28.9777
KLHDC8B	-1.39627	0.125982	1.79896	0.0147837	2.51184	0.000292383	FALSE	TRUE	25.8799	36.1354	14.386	23.8074	41.6601	15.1575	10.7822	19.6539	7.17665	34.6437	42.5006	25.5487	17.5892	20.4348	7.84633	38.6801	49.9486	19.9256	16.4383	22.7442	7.02856	43.9612	46.4434	11.6459	21.1371	45.698	20.7589
PEX19	-1.34064	0.127816	1.59433	0.215524	2.13743	0.00869436	FALSE	TRUE	29.9023	40.0884	18.7554	10.2032	29.7264	7.04509	4.88479	30.8209	8.02811	32.8205	28.6671	15.3134	32.9796	28.036	22.2311	48.4814	58.2736	27.279	22.1067	30.3255	11.3187	58.2711	68.5555	23.072	29.4712	46.302	35.7561
FAM83E	1.63234	0.127833	-1.45537	0.571394	-2.37566	0.0415132	FALSE	TRUE	3.92706	2.40578	5.71532	2.61629	2.22399	2.98888	10.7226	3.12684	7.54156	0.561134	0.0001	2.5391	1.19936	1.57959	6.86555	4.90074	1.0407	8.06518	3.40112	8.46301	9.49308	5.23709	0.84808	2.63689	2.77811	1.96397	5.59229
TYMP	-1.41233	0.127948	1.58371	0.207001	2.23672	0.00821142	FALSE	TRUE	109.553	154.725	69.1749	240.93	295.488	68.5291	190.026	289.151	96.9448	92.2199	153.669	61.015	31.1807	141.07	45.4429	59.3326	82.2073	77.8044	87.1037	65.9405	87.6275	78.7025	98.5619	63.503	96.9299	111.715	52.5329
CTSV	1.57099	0.128007	2.67142	0.000741676	1.70047	0.0323857	TRUE	FALSE	54.5854	34.7458	20.4331	122.961	14.148	21.7755	15.6669	24.3385	12.1637	43.5504	27.5004	24.8347	42.9734	52.2378	27.7888	61.258	45.3404	11.6233	39.8676	29.5256	7.94134	45.9078	48.922	22.8522	64.4985	35.954	34.4852
SMPD3	1.89171	0.129957	3.20202	0.0232266	1.69266	0.402618	TRUE	FALSE	4.38313	2.31702	1.36886	14.6508	2.46491	1.92146	3.33599	0.148993	0.851555	2.8754	1.50012	0.476162	1.59911	1.13536	0.653953	1.05024	2.97323	1.66056	2.64533	2.46845	1.55184	4.49949	4.37046	1.20863	4.40868	3.47464	2.62673
PBX3	-1.3816	0.130223	-2.02746	0.00248653	-1.46747	0.0845493	TRUE	FALSE	5.68826	7.85891	11.5327	3.66277	5.81927	8.64622	6.37403	7.74251	16.9076	5.96109	9.66688	10.8702	4.19749	4.24498	5.88477	3.15051	4.31114	6.64193	4.1569	9.69718	16.7954	10.0315	9.00173	15.1616	7.97178	12.3876	11.3539
FAM171A2	-1.25822	0.13083	2.46034	0.0457897	3.09564	0.00116054	TRUE	TRUE	2.5738	3.2384	1.04612	2.35467	2.66877	1.81472	0.893642	1.48903	0.973192	1.26243	3.33347	2.06304	1.19936	2.86293	0.653953	0.525168	2.97323	0.711725	2.26744	2.99738	0.730329	6.04846	4.37046	0.659298	6.03925	5.21191	0.762671
PRKRIR	1.58463	0.131574	2.15839	0.0422295	1.36207	0.566169	TRUE	FALSE	12.3394	7.78689	5.71693	6.42796	12.8534	4.83719	13.1518	8.73697	8.38013	10.63	0.858295	2.32002	27.7996	9.93424	2.98415	7.99427	7.69646	5.67153	20.402	6.64064	8.7185	4.35152	10.9338	7.61798	7.95779	4.64129	5.20597
RASGRP2	-1.76424	0.131575	-2.68888	0.00368488	-1.5241	0.112936	TRUE	FALSE	1.94024	3.42305	5.21708	3.66277	4.02163	4.48328	2.68073	6.40248	4.0141	1.47282	4.83349	5.95088	2.39861	2.81357	3.92322	2.10037	5.5004	8.5396	1.13377	1.23427	6.38961	1.10651	1.36991	1.3185	0.966365	1.20864	7.11743
VIT	-1.31274	0.131806	-2.62706	0.0455631	-2.0012	0.58987	TRUE	FALSE	1.97232	2.58915	5.18139	0.0001	1.61242	0.854038	6.19532	4.16909	9.12284	1.05204	1.33345	2.93582	1.39923	2.31998	3.92322	1.05024	2.82458	7.35356	0.755881	2.11583	10.5884	3.39308	4.82706	4.72435	1.93263	1.51077	1.94889
LINC00478	-1.94178	0.131857	-2.47496	0.0173266	-1.27458	0.331541	TRUE	FALSE	2.90801	5.64671	7.19719	3.66277	4.87412	11.3148	1.90632	16.4606	10.7041	3.71695	3.1668	11.5843	1.99886	3.55395	2.94244	1.75033	1.63532	5.45589	3.21217	8.2867	1.64312	3.39308	4.17477	8.67954	3.62359	3.02144	5.25336
XDH	-2.27417	0.13288	1.05542	0.598053	2.40021	0.0471591	FALSE	TRUE	2.63247	5.9867	2.49424	6.27895	9.47015	3.73608	2.26374	16.825	5.71701	1.96372	5.8335	4.60204	0.399852	1.18472	0.327026	2.80046	4.16249	2.37218	4.72373	5.64204	0.273936	1.84411	3.71817	2.41716	0.78519	1.05757	0.508481
RP11-109J4.1	1.76666	0.13363	6.40525	6.97416e-07	3.62563	3.60479e-05	TRUE	TRUE	9.40345	5.32274	1.46809	15.9589	7.82073	0.747296	6.13575	2.97795	0.729919	7.08316	5.16683	2.85648	4.39737	5.67639	2.28858	17.6774	6.09502	3.08381	9.82526	6.87622	0.456493	3.09804	3.58771	0.988897	11.0517	4.38104	0.593211
SCEL	1.86969	0.135188	-1.50773	0.0658911	-2.819	0.00190696	FALSE	TRUE	34.6236	18.5183	52.2032	86.0726	25.8157	61.4836	31.8102	19.9517	39.5319	31.4181	17.5003	49.5106	15.7903	6.86101	26.4811	5.95087	8.32487	20.8744	17.3831	34.557	83.1549	24.4886	11.8718	57.7895	64.0754	23.2644	78.7995
HIST1H2AG	-1.29612	0.136413	1.54875	0.219656	2.00737	0.00973424	FALSE	TRUE	85.0775	110.271	54.9331	40.2741	107.625	52.3875	19.4045	111.382	44.3569	100.572	73.4141	29.7483	78.2444	162.485	57.5289	64.0741	67.6288	59.669	97.7477	55.6206	49.8161	94.5262	138.449	70.6969	185.777	165.561	75.2609
AUNIP	1.52586	0.136561	2.34969	0.0025466	1.53991	0.081831	TRUE	FALSE	7.65747	5.01847	3.25893	11.773	6.13432	7.04509	3.87211	4.16909	1.09483	4.97928	4.66682	4.04663	7.39551	8.4405	4.904	10.3264	7.13562	2.60939	13.4152	1.76321	2.09951	5.08957	4.89229	2.74676	4.40868	2.94591	1.52524
ASPA	-1.24373	0.137077	-2.58501	0.000738218	-2.07844	0.0297055	TRUE	TRUE	4.83726	6.01624	12.5044	0.784957	4.07724	6.08441	1.13192	6.70026	14.1099	3.29618	2.83347	9.75937	5.59662	4.14626	14.7118	1.92535	5.94636	8.30239	10.581	10.755	9.21925	6.56478	7.17531	16.9195	8.81726	6.49599	20.9284
SLC35A2	-1.33536	0.140025	1.57571	0.125726	2.10414	0.00463096	FALSE	TRUE	10.9438	14.6139	6.94532	4.186	9.65551	5.23047	8.28025	13.8471	2.91938	13.6052	19.5003	6.03022	4.48094	7.30524	3.26936	9.62635	16.055	9.25122	7.36897	10.0498	9.85819	24.1198	19.047	7.14141	15.8831	21.4516	11.8623
DCD	-1.53547	0.140308	-5.90972	0.539774	-3.84879	0.0418474	FALSE	TRUE	189.662	291.222	1120.85	172.408	259.735	995.467	38.4225	1507.94	1.3381	151.968	66.6675	105.29	778.131	91.0192	2263.46	29.754	86.5181	350.363	151.913	317.894	628.862	176.585	0.0001	611.275	18.1176	0.0001	4010.76
APOL6	-2.17026	0.141052	1.05104	0.512601	2.28104	0.038493	FALSE	TRUE	1.8089	3.9258	1.72106	2.35467	11.0639	1.49449	1.3702	6.25359	0.973192	3.78708	2.33346	2.85647	2.39861	3.70203	2.94244	1.5753	3.56786	3.79543	1.13377	0.705343	0.639205	0.885226	1.89175	0.219833	0.966365	1.88844	0.847401
ZNF311	1.92061	0.143574	-1.21689	0.252082	-2.33718	0.0127373	FALSE	TRUE	3.33139	1.73455	4.05394	1.56981	2.81702	2.34843	8.16111	1.48903	8.27138	1.33256	1.16678	3.49122	2.99824	1.72767	2.28858	0.875214	0.44607	3.08381	7.18002	1.23427	3.1958	3.02428	2.80496	6.70194	1.50989	2.19057	3.05038
PROB1	-1.27041	0.144914	1.65324	0.432037	2.10029	0.0298161	FALSE	TRUE	1.57366	1.99919	0.951861	2.35467	1.42709	1.38775	0.178808	2.38238	0.608282	0.701393	2.16679	0.63485	0.599728	1.33279	0.980879	1.75033	2.37861	1.18614	1.32272	2.29214	0.456493	3.02428	1.36991	1.42836	2.65733	2.64377	0.932131
ACRBP	-1.38203	0.146296	-2.07359	0.0142179	-1.5004	0.267009	TRUE	FALSE	1.4226	1.96607	2.94989	0.784957	2.35371	4.59002	3.75297	1.63792	3.52756	0.98191	2.00012	3.49122	0.199976	0.544362	0.980879	0.350145	1.48667	2.60939	1.88955	3.17369	2.46462	1.54907	1.43514	4.39475	1.87224	3.09697	1.54071
APMAP	-1.77404	0.147189	1.94963	0.180226	3.45871	0.00812166	FALSE	TRUE	142.96	253.617	73.327	74.0381	139.375	36.1856	234.001	231.527	43.7891	173.568	697.88	92.0387	83.9477	36.032	18.9618	228.928	247.959	29.6512	11.3368	99.6153	33.408	290.336	334.777	161.173	47.5282	241.774	171.409
TLCD1	-2.07372	0.147249	1.52584	0.415688	3.16417	0.0285475	FALSE	TRUE	5.32598	11.0446	3.49053	4.70924	4.61466	3.30911	11.0204	12.9538	2.91938	5.32993	26.8337	2.45976	1.19936	0.937922	0.653953	5.95087	8.47353	1.18614	0.944827	3.70262	2.92102	10.9167	17.5468	5.49342	2.53654	13.294	8.98149
ENTPD6	-1.62113	0.149887	-2.14862	0.025764	-1.32538	0.38477	TRUE	FALSE	7.54599	12.233	16.2134	4.97086	13.0284	20.8148	7.08886	30.2253	36.856	7.1533	6.83351	23.3272	3.99762	6.95973	3.92322	4.55069	4.60846	10.2001	6.80213	9.69718	9.58435	14.0884	11.4804	10.767	11.7161	15.0313	14.2348
DUSP16	-1.39175	0.150177	1.48034	0.100166	2.06027	0.00377692	FALSE	TRUE	40.0586	55.7516	27.0603	27.7317	38.6401	19.8542	49.7406	43.6256	23.4759	53.3685	102.168	23.3272	21.1869	23.7912	17.3272	40.0803	66.3009	17.0791	19.6504	32.9702	32.1302	69.999	78.0143	39.9914	38.7111	60.5024	43.2972
BHLHE22	-1.55901	0.150177	1.75503	0.0235597	2.73611	0.00064256	FALSE	TRUE	3.16074	4.92763	1.80096	1.04658	4.91118	1.38775	1.78718	4.0202	0.729919	2.3845	3.50014	4.36401	4.39737	8.58858	0.327026	4.37567	6.39233	4.26985	3.03137	5.81835	0.63905	5.6059	3.84863	1.75796	2.65733	2.34164	0.932131
MEF2A	-1.23607	0.152806	-2.32159	7.3337e-07	-1.8782	3.12204e-05	TRUE	FALSE	30.755	38.0155	71.4005	26.6852	33.1916	98.7367	32.5846	29.3319	79.3071	26.2986	41.1672	88.8651	32.5799	32.1822	60.1545	24.8533	31.3666	51.2371	38.5449	67.3508	59.9654	35.6264	33.2018	71.7631	28.8673	36.3317	61.1752
NR1H3	-1.32511	0.153096	1.85916	0.0840427	2.46358	0.00309339	FALSE	TRUE	14.7611	19.5601	7.9397	8.89514	17.5874	6.40463	18.8836	8.04029	2.55447	11.8519	29.8338	7.77579	7.79526	16.2392	6.2117	41.3054	37.1642	9.72564	9.25842	12.5182	8.30646	15.9323	19.7645	12.9643	4.16712	15.3334	9.57461
ECHDC1	-1.38978	0.154302	1.63223	0.503079	2.26844	0.0415132	FALSE	TRUE	10.5599	14.6759	6.46961	21.4529	21.127	8.00577	15.9051	7.14694	3.28428	10.6598	8.00019	4.91941	13.9914	12.1424	6.2117	11.0265	13.9738	9.96285	1.51166	19.3943	4.19892	9.1464	29.3533	13.7334	0.78519	6.26938	1.44051
RHOBTB1	-1.39413	0.15644	-2.03054	0.0209302	-1.45649	0.325517	TRUE	FALSE	1.73146	2.41389	3.5158	1.56981	2.31665	2.88214	4.82523	5.21134	7.17665	0.701393	2.50013	3.41188	1.19936	1.23408	1.30781	0.700191	1.33801	1.66056	0.944827	2.29214	5.29426	1.91787	2.15266	1.64809	1.99302	2.2661	4.74498
ZNF774	-1.52405	0.157247	-2.31687	0.0180992	-1.52021	0.294596	TRUE	FALSE	2.98015	4.54189	6.90462	4.186	5.35597	5.23047	2.38288	7.29583	15.6912	2.80527	3.00013	8.80725	0.99948	1.57959	2.61551	1.40028	2.37861	7.11635	2.0785	6.17097	1.55184	4.13069	4.43569	7.36114	5.85808	6.11831	6.86324
KRT23	1.48348	0.157656	-1.45345	0.110899	-2.15616	0.00461923	FALSE	TRUE	103.843	69.9993	150.93	135.781	84.4923	155.737	76.4879	62.0885	66.6565	228.687	83.168	160.832	171.295	63.822	271.348	50.5816	68.0851	108.641	58.3843	155.505	205.558	65.4989	21.0039	93.6067	44.0254	21.8293	145.058
NCF2	-1.54292	0.159654	-2.72937	0.00469874	-1.76897	0.11085	TRUE	FALSE	0.876559	1.35246	2.39246	0.523338	0.945251	0.854038	0.953211	0.893455	5.47374	0.561134	0.833443	1.74566	0.399852	1.23408	2.94244	0.875214	1.33801	3.32102	1.70061	1.93952	2.37334	1.03275	2.80496	0.988897	0.966365	0.830968	1.44051
GTF2H2	-1.50366	0.16054	-2.72511	0.0243743	-1.81232	0.351598	TRUE	FALSE	14.7289	22.1473	40.138	2.22073	7.8802	19.5979	24.4451	8.545	20.4521	2.07245	49.8711	10.8064	11.5763	14.545	11.4919	3.56341	7.74758	16.3206	34.768	34.4223	126.899	27.3048	18.791	88.3468	11.8804	35.3761	27.1889
CD200R1	-1.75563	0.162104	1.51999	0.389823	2.66855	0.0290239	FALSE	TRUE	3.0668	5.38416	2.01764	0.261719	1.03791	0.533811	0.297947	11.0181	0.608282	2.24424	2.83347	1.19026	4.19749	5.57767	0.980879	5.77585	2.67592	5.21868	3.02322	2.46845	0.273936	4.20445	6.13165	4.28489	4.52947	11.3301	3.05038
OLFML2A	-1.59775	0.162527	-2.60659	0.00974261	-1.63141	0.186487	TRUE	FALSE	32.437	51.8264	84.5498	24.5923	33.3393	16.5451	54.5657	54.3459	100.471	10.3792	13.8336	27.5317	20.9871	54.091	84.0204	52.1569	68.0846	108.879	30.7982	108.079	180.181	36.364	37.4418	68.4468	29.6523	45.3957	90.323
HSPA7	-1.42424	0.163386	-2.27695	0.0149606	-1.59872	0.250501	TRUE	FALSE	18.9742	27.0238	43.2034	37.355	37.0783	47.6361	37.0868	51.062	58.7781	2.0898	8.0391	7.81531	6.71671	17.2786	32.5447	20.4308	22.9968	69.5113	12.2922	22.7927	30.4396	13.3784	17.4205	26.4952	22.444	39.5221	72.4068
TF	-1.5628	0.165075	2.15312	0.517435	3.36489	0.0472321	FALSE	TRUE	41.1923	64.3753	19.1315	9.94162	68.9035	16.1182	15.1307	18.3139	14.3532	52.1062	144.668	24.9142	29.9815	13.1296	6.2117	178.173	182.702	13.0466	1.70061	14.2813	6.48088	25.595	34.1802	13.2939	16.9097	38.8243	58.6333
ACAA2	-1.58479	0.165478	1.79751	0.238067	2.84868	0.0141295	FALSE	TRUE	102.058	161.741	56.7774	23.5458	46.9044	37.8913	39.6101	107.791	35.6397	136.674	288.496	38.5571	76.9412	42.5957	30.4042	255.356	296.118	51.2334	32.3098	60.2985	22.9103	198.04	258.363	100.747	53.9875	193.358	136.836
COL23A1	-1.27989	0.166013	-4.43105	0.0124664	-3.46206	0.217558	TRUE	FALSE	1.27541	1.63238	5.65141	0.261719	0.333683	2.0282	3.5147	3.42463	6.56847	0.0001	1.66679	1.66632	1.19936	1.23408	2.28858	1.05024	0.89204	4.74427	0.755881	1.5869	8.85413	1.54907	1.95698	11.0966	1.87224	1.96397	7.96473
C19orf40	-1.53581	0.166405	1.38369	0.324087	2.12509	0.0225104	FALSE	TRUE	1.77916	2.73244	1.2858	0.523338	1.63095	0.640554	2.56159	5.65801	1.2523	1.26243	3.33347	0.793537	1.73559	1.52908	1.63473	3.15051	1.78398	1.18614	1.51166	2.64476	2.23988	1.91787	4.14617	1.09876	1.57028	1.1331	1.44051
OBP2A	1.31788	0.166762	-4.23904	0.0959998	-5.58655	0.00414339	FALSE	TRUE	6.56145	4.97878	27.8143	24.0363	10.1966	38.6952	8.87594	7.14694	18.1239	6.52213	0.833443	13.7958	5.99638	2.61613	44.4621	0.700191	2.97323	17.7904	1.51166	15.868	33.9498	3.76188	0.195788	10.9626	1.08715	0.0001	44.7343
RP11-434I12.5	-1.45743	0.167785	1.51992	0.194925	2.21518	0.0108248	FALSE	TRUE	10.1951	14.8587	6.70765	9.51718	15.8571	6.25801	4.78742	8.48549	5.12472	17.2178	35.3979	9.09503	7.30618	6.15895	8.48143	16.4062	14.6734	5.16413	3.55103	8.21219	3.1386	14.6829	19.8447	9.52121	8.09193	10.2395	6.8781
MRC1L1	-1.58938	0.168426	-2.52929	0.0475345	-1.59136	0.512002	TRUE	FALSE	4.62537	7.35149	11.6989	0.261719	2.8592	3.09563	6.4336	2.53127	2.6761	7.78445	5.50016	2.77713	2.79836	6.07126	13.0772	4.55069	7.8789	17.5535	6.80213	14.8102	21.907	3.5406	11.1543	9.119	4.83142	8.00665	23.3856
KRT79	-1.5098	0.171123	2.88596	0.44393	4.35723	0.0382697	FALSE	TRUE	352.429	532.099	122.119	212.104	337.206	80.7669	889.484	342.41	121.228	466.876	1237.24	137.36	125.575	48.0574	11.4627	516.149	731.494	23.2553	0.567812	146.861	12.0659	581.94	803.028	272.111	26.7385	610.496	318.7
LOXL2	-1.17221	0.171418	-2.12767	0.00102736	-1.81509	0.0298039	TRUE	FALSE	6.58928	7.72404	14.0198	3.66277	9.50715	17.1856	20.492	12.9538	13.745	3.15592	5.66683	9.60069	3.39799	8.95277	12.0964	2.10037	8.62219	9.96285	6.23529	5.64204	26.7447	8.11376	4.63138	7.91048	5.55613	5.81618	14.9126
ZNF467	-1.30198	0.171587	-2.10168	0.00722011	-1.61421	0.141935	TRUE	FALSE	1.83869	2.39394	3.86433	3.66277	1.946	4.48327	2.32331	2.41366	6.08192	0.911781	2.00012	2.38041	0.99948	1.82639	2.61551	0.525168	1.33801	1.42335	1.32272	3.52631	4.83787	2.06539	3.45725	3.07636	2.89889	2.64377	6.01594
PMVK	-1.48834	0.171962	1.36568	0.313321	2.03259	0.0223147	FALSE	TRUE	71.7642	106.809	52.5483	57.8179	80.653	35.3318	153.213	144.873	63.2511	49.3711	149.502	34.9907	34.5786	23.3963	25.8273	67.0338	85.4777	26.5674	30.0424	62.943	53.3068	120.82	185.643	95.3641	61.2371	121.987	85.747
DCDC1	1.68107	0.173043	-2.05329	0.0157594	-3.45172	0.00050079	TRUE	TRUE	3.53383	2.10214	7.25599	4.44762	1.77921	4.48327	11.0204	2.68017	11.7988	1.96372	0.666774	8.72791	2.85321	2.61613	2.61551	1.05024	0.594727	8.30239	3.21217	4.9368	10.4059	1.54907	1.95698	8.24007	2.1742	1.5863	3.47403
SCGB1D2	-1.08791	0.173467	-3.76403	0.513516	-3.45986	0.0495061	FALSE	TRUE	24.2875	26.4227	91.4188	15.9589	34.841	49.1015	4.58695	34.2454	2.79774	36.9582	1.00011	9.91807	67.5582	33.4655	272.33	31.3292	60.206	39.3767	8.31369	47.4277	43.8138	25.0049	0.195788	31.8613	4.58986	0.0001	282.151
HIST1H2AB	-1.36347	0.17422	1.7157	0.328615	2.33931	0.0243984	FALSE	TRUE	9.99515	13.6281	5.82569	2.94475	5.88587	8.43274	1.78718	19.7215	3.52856	7.52885	12.6669	1.92374	8.59476	15.0484	5.56322	6.47594	8.19136	5.60099	7.22871	3.92594	4.34565	17.1524	24.3654	6.18459	28.2486	19.2193	11.026
CBLB	-1.30569	0.174734	-2.04855	0.00251298	-1.56894	0.0612453	TRUE	FALSE	4.6511	6.07289	9.52802	3.66276	4.05869	5.65744	8.04199	8.93365	17.2725	3.57669	5.16683	6.90301	3.99762	6.21935	4.57707	2.10037	3.4192	9.96285	6.42424	6.52359	11.4099	3.9094	8.219	8.24007	5.49573	6.04278	12.2013
ACADL	1.25913	0.175051	-2.35737	0.0172894	-2.96823	0.000565926	TRUE	TRUE	3.12661	2.48316	7.37059	2.09305	3.3174	7.15183	3.45513	3.16282	12.5287	2.24424	0.333437	6.58563	3.39799	3.20844	5.23092	1.92535	3.12189	9.01402	7.36897	5.28942	2.92102	1.99163	0.978539	6.04275	2.53654	0.453301	9.48987
TMEM164	-1.58387	0.17774	1.76138	0.167859	2.78981	0.0095226	FALSE	TRUE	45.9729	72.8153	26.1004	17.0053	22.6281	16.8654	56.3528	48.4406	39.4103	54.6308	159.669	26.977	21.5867	22.804	8.50019	61.4331	100.046	23.7209	17.3831	29.9729	29.3918	112.336	106.649	26.1483	27.0555	92.3127	37.7897
SLC38A4	-1.47549	0.177893	-2.80656	0.0155435	-1.90212	0.237807	TRUE	FALSE	1.6386	2.41773	4.59881	0.261719	2.26105	4.05631	0.297947	1.63792	6.93338	2.3845	1.00011	7.14104	0.99948	2.76421	2.94244	1.40028	1.63532	7.35356	1.70061	1.5869	1.09544	2.803	2.41358	0.659298	3.26124	6.04278	6.60905
POSTN	-1.42436	0.178175	-3.12305	0.00167749	-2.19261	0.0429247	TRUE	TRUE	89.258	127.135	278.757	4.186	46.3311	135.776	138.261	175.693	371.478	63.4671	75.3343	203.437	161.7	139.143	156.598	74.9098	74.4771	219.418	83.8918	293.734	683.86	89.6928	91.0602	280.709	97.9552	121.307	178.781
FITM2	-1.58674	0.178351	1.91291	0.068677	3.03529	0.00298486	FALSE	TRUE	28.4388	45.1248	14.8667	16.2205	27.9655	7.47206	43.1284	35.7343	12.7719	31.2076	72.5009	15.6308	13.1919	8.24306	5.23092	46.0311	67.9362	7.35356	6.42424	21.51	10.8623	52.2225	66.0773	21.3142	19.0838	61.0312	38.2981
HAUS7	-1.71043	0.178549	-3.26252	0.00287048	-1.90743	0.0664683	TRUE	FALSE	11.0029	18.8196	35.8971	23.2842	50.5237	46.148	4.16996	29.4374	53.5608	8.55751	8.16686	99.1531	4.39737	8.65441	22.8849	7.52608	6.24368	18.8189	19.4001	21.7559	10.2848	9.73649	9.61057	16.8097	10.9511	16.1643	19.5163
PGRMC1	-1.51569	0.179143	1.68244	0.0872253	2.55005	0.00406028	FALSE	TRUE	235.164	356.436	139.776	150.693	252.374	121.58	190.98	244.482	86.4836	305.553	969.178	158.291	255.442	114.908	87.2894	453.309	446.416	110.065	91.0717	173.49	122.313	323.145	372.068	186.553	111.121	278.568	245.633
KRT72	1.30095	0.179159	-3.78933	0.0107816	-4.92973	0.182237	TRUE	FALSE	1.54014	1.18386	5.83611	8.63439	0.444886	10.294	0.476655	1.04256	8.0281	0.771526	0.666786	6.11004	0.399852	1.33288	3.92435	0.0001	1.0407	1.69497	0.944827	2.82107	2.55625	0.368934	0.91331	0.439565	0.724874	1.2087	13.6416
FZD10	-1.20258	0.179882	-2.87816	1.02337e-05	-2.39332	0.000366416	TRUE	TRUE	7.20904	8.66946	20.7488	5.75572	7.13507	25.298	5.71877	10.7204	24.9356	13.6052	5.66683	17.059	4.997	7.79883	21.2503	2.45042	7.13562	19.4512	4.1569	12.8708	29.3918	11.5067	8.28421	10.2177	9.48157	9.74392	18.3865
FASN	-1.51875	0.180585	2.60546	0.123783	3.95704	0.00646539	FALSE	TRUE	480.886	730.346	184.569	235.457	506.323	57.1072	905.694	647.832	180.265	254.219	754.009	156.625	238.252	85.2432	49.0391	875.289	976.079	55.744	22.6735	214.041	41.4406	1228.78	1380.84	424.304	86.7224	1278.4	512.024
VASH1	2.11205	0.181008	2.58758	0.0189267	1.22515	0.26804	TRUE	FALSE	50.1902	23.7637	19.3966	9.15676	11.0269	25.298	172.454	33.6498	17.0292	16.761	16.3336	41.1003	36.9771	44.522	10.1348	51.9818	18.5822	39.8511	53.0937	20.6284	8.76285	37.5442	26.4832	3.84542	23.5528	18.8835	9.15095
MEOX1	-1.39762	0.181013	-2.83259	0.00115616	-2.02672	0.0307503	TRUE	TRUE	3.20904	4.48501	9.08988	1.04658	3.42859	8.64622	7.74413	9.67812	8.75793	2.8754	3.1668	2.61844	2.19873	2.27062	7.84633	2.2754	7.58159	6.64193	1.13377	3.52631	17.7082	4.35197	3.1311	5.16382	4.04633	3.09697	15.3362
CERS4	-1.37482	0.181472	1.68791	0.165344	2.32057	0.00960113	FALSE	TRUE	13.6012	18.6991	8.058	15.9589	14.9187	7.47205	3.93168	17.2716	8.0281	16.8311	22.0003	8.72791	8.79464	6.86101	4.25014	14.352	21.1093	7.11635	3.96795	7.40514	4.74659	27.2178	28.8315	9.88806	17.7552	31.1955	14.2348
GLDC	-1.53193	0.181803	3.12205	0.305209	4.78277	0.0230705	FALSE	TRUE	34.867	53.414	11.168	9.15676	14.0847	1.60123	5.71877	14.2938	5.71701	64.112	90.0011	19.4393	16.7897	8.48986	3.92322	89.7868	120.115	7.35356	0.189045	15.5154	0.0913786	90.2844	113.827	23.5115	2.89889	50.9852	27.7068
SNX22	1.66567	0.181809	-1.21097	0.347168	-2.01708	0.0280397	FALSE	TRUE	1.87508	1.12572	2.27066	3.92438	1.18618	0.854038	0.953211	0.148993	2.55447	2.17418	1.33345	3.25319	3.19811	1.67831	3.26936	1.92535	0.89204	2.60939	0.189045	0.529032	2.28207	1.54918	2.93552	1.64809	1.08716	0.302234	1.6947
CYB5A	-1.9458	0.183179	1.62607	0.230756	3.16402	0.0154874	FALSE	TRUE	126.97	247.059	78.0839	76.916	119.519	61.6969	224.809	244.1	80.8818	178.113	758.297	78.7092	80.1499	32.3796	21.5772	140.019	181.805	33.2093	26.4525	75.9898	42.171	236.037	354.32	170.609	53.2656	210.06	135.817
AGPAT3	-1.65973	0.184371	2.0424	0.105771	3.38982	0.00542174	FALSE	TRUE	100.151	166.224	49.0361	99.9388	135.522	59.3484	52.7196	147.85	45.2489	167.259	381.513	77.9155	63.3608	26.0124	19.9426	152.796	180.321	30.3627	21.3509	50.954	14.8785	210.147	268.105	65.3702	33.6385	139.512	79.2224
COL7A1	-1.51352	0.184998	-3.27029	0.000843261	-2.16072	0.0227805	TRUE	TRUE	120.308	182.089	393.443	80.3171	298.404	578.961	136.652	294.658	707.666	122.235	154.835	878.807	77.1521	122.901	209.233	108.689	75.9638	297.718	217.287	260.587	119.21	115.658	118.913	151.836	104.475	130.448	204.114
AC074286.1	1.883	0.185738	2.3543	0.0203013	1.25029	0.274658	TRUE	FALSE	2.69516	1.43131	1.14478	1.56981	1.01938	0.427069	1.01278	3.12684	3.16265	3.99747	0.833443	2.14238	1.19936	1.086	0.327026	1.92535	0.594727	0.237308	3.59006	1.05796	0.821608	0.958986	1.23946	0.769164	7.30748	2.49271	1.27105
ATP1B1	1.63848	0.188913	-1.36666	0.313575	-2.23925	0.0252657	FALSE	TRUE	181.04	110.492	247.42	75.3464	129.757	304.966	260.62	165.868	82.7136	215.37	55.334	102.275	430.942	94.5238	269.717	58.4578	111.196	194.513	83.3254	241.548	500.944	235.299	43.6388	91.8491	88.9578	42.0725	432.383
RP11-834C11.4	-1.26741	0.191621	-2.43168	0.00187889	-1.91862	0.0430936	TRUE	FALSE	1.0589	1.34206	2.57491	0.523338	1.76068	2.24169	0.893642	1.78681	2.43283	0.140359	1.16678	1.98369	0.799604	0.592409	2.61551	0.525168	1.93264	1.66056	2.45639	1.76321	2.64718	1.62283	0.978539	2.52702	1.50989	0.755435	4.4908
ACADVL	-1.42076	0.193186	1.69124	0.293772	2.40286	0.0236179	FALSE	TRUE	72.9355	103.624	43.1254	24.5923	48.6661	17.7193	20.3729	21.4406	21.773	146.009	117.335	40.6241	36.5774	56.5656	56.2314	121.991	198.604	68.7905	27.7751	98.734	28.7529	149.881	163.922	30.8725	56.285	123.725	80.2395
ESAM	-1.1962	0.193289	-2.65094	0.0465385	-2.21613	0.456207	TRUE	FALSE	1.77794	2.12677	4.71321	0.0001	2.29811	2.98888	3.39556	2.23349	5.23047	1.61307	1.00011	1.82501	0.399852	1.28344	3.26936	3.32553	5.5004	2.60939	1.51166	1.23427	11.5012	2.28667	1.50037	1.97769	1.69106	1.96397	8.30365
HYAL1	1.62279	0.193549	-1.42841	0.0768141	-2.31802	0.00387064	FALSE	TRUE	18.7852	11.5759	26.8331	47.3531	12.1202	29.3542	24.6618	13.6982	40.1401	9.3273	13.3336	39.4339	5.39675	4.78793	28.1158	6.47594	7.43293	17.0791	23.6183	17.4549	26.1058	11.9493	3.91385	12.7446	21.4995	19.8654	21.691
UGT8	1.41687	0.194882	-2.09342	0.466672	-2.96611	0.0487696	FALSE	TRUE	2.03971	1.43959	4.26997	3.13953	2.27958	4.69676	0.655364	3.12684	5.35211	2.59488	0.0001	3.01516	3.19811	1.086	10.7887	3.15051	2.52726	4.74427	0.755881	1.5869	0.365215	2.58172	0.456705	1.97769	0.241666	0.453301	3.21984
ABHD6	-1.29018	0.194927	1.61371	0.267507	2.08196	0.0208388	FALSE	TRUE	30.589	39.4652	18.9557	57.5562	50.7408	13.3429	34.7293	34.5431	23.3543	39.4832	72.168	20.1534	11.1931	13.1296	20.2695	44.4558	43.8538	17.0791	8.50264	20.0995	14.4221	36.2905	38.8118	23.6213	12.5011	42.3747	19.4033
PPARGC1A	1.54164	0.195776	-1.51572	0.0617695	-2.3367	0.00300327	FALSE	TRUE	58.7536	38.111	89.0541	71.4221	34.3035	108.237	161.374	82.0399	47.3167	62.6953	44.1673	63.5544	56.9647	24.7783	85.3279	25.5534	27.7989	62.6231	27.7751	62.0614	167.678	46.9118	15.916	56.3615	17.3325	13.8227	121.334
CHST1	3.94332	0.197223	4.49169	0.0109924	1.13906	0.167647	TRUE	FALSE	5.62818	1.42727	1.25302	5.75572	0.77846	1.06752	12.9862	2.23349	1.21646	1.96372	2.83347	1.34894	2.39861	0.592409	0.0001	1.40028	1.18935	3.32102	6.80213	1.05796	0.0913786	5.38461	1.82652	1.53823	8.33413	0.906502	1.44051
GBP5	-1.88464	0.197642	1.70569	0.168535	3.21461	0.0111046	FALSE	TRUE	3.55506	6.69998	2.08423	4.70924	13.9549	1.17426	4.58695	6.70026	1.3381	2.94553	6.33351	0.952225	2.79836	13.179	1.63473	2.2754	5.05443	3.55822	7.36897	4.05524	3.37741	2.72924	3.71817	1.75796	1.02676	0.604368	2.88092
UBE2Q2P3	-1.46203	0.198603	-2.2665	0.0277574	-1.55024	0.319541	TRUE	FALSE	4.01902	5.87592	9.10909	6.95026	7.01541	16.7637	0.595794	10.7466	10.9661	5.44901	10.1139	18.0088	1.71219	2.4729	4.44977	2.77564	2.92677	6.83929	3.49559	5.63098	1.66755	4.85672	5.10822	6.20243	6.31699	2.99256	7.97512
UBE2Q2P2	-1.46245	0.199135	-2.26798	0.0277198	-1.55081	0.318497	TRUE	FALSE	4.01639	5.87376	9.10909	6.95026	7.01541	16.7637	0.595794	10.7466	10.9661	5.44901	10.1139	18.0088	1.71219	2.45566	4.44977	2.77564	2.92677	6.83929	3.49559	5.63098	1.66755	4.85672	5.10822	6.20243	6.29588	2.99256	7.97512
GRIK2	-2.39542	0.199242	-4.56719	0.0019227	-1.90664	0.0418221	TRUE	FALSE	1.30919	3.13605	5.97931	1.83143	0.537539	3.41585	0.834072	2.0846	2.91938	0.701393	1.66679	5.47482	1.59911	8.24305	19.2888	0.350145	0.743383	3.08381	3.21217	6.34728	2.64718	1.40155	5.08798	7.36114	0.543624	0.377767	3.64349
CD93	-1.11947	0.200992	-3.19889	0.0430758	-2.85751	0.421375	TRUE	FALSE	3.70735	4.15025	11.8594	0.0001	2.70583	3.62934	8.04198	3.42463	4.13574	3.08579	1.50012	1.98369	3.19811	3.80075	14.3849	4.55069	11.298	12.8093	0.377991	2.64476	35.5988	5.08957	4.95752	7.25128	5.31456	2.87037	15.0821
DHCR24	-1.55268	0.204245	2.15271	0.0581252	3.34247	0.00296995	FALSE	TRUE	455.169	706.732	211.44	268.683	453.832	291.091	472.147	384.738	238.651	648.766	1776.15	240.253	222.451	163.769	161.829	637.244	711.762	126.432	108.644	245.248	151.796	1010.02	1045.36	202.705	273.399	872.998	278.762
THBS2	-1.14866	0.205724	-2.33799	8.62048e-05	-2.03541	0.00242017	TRUE	TRUE	24.0894	27.6707	56.321	21.1912	29.8836	54.4389	6.13575	32.1609	66.4136	12.2727	22.3337	61.0158	20.5873	28.8258	43.4813	28.0037	35.6777	61.1998	26.8303	23.0968	33.2255	52.1488	31.6363	80.9716	25.5457	17.7505	49.8213
PCDH7	-1.32215	0.209306	-2.68923	0.00173364	-2.03399	0.0359723	TRUE	TRUE	6.345	8.38903	17.0632	1.30819	5.61541	11.208	8.16111	12.656	33.6934	8.41562	9.33354	11.8223	5.7965	3.89947	5.88477	6.47594	8.02756	11.8605	3.77901	8.11039	35.9639	8.18751	12.0675	12.8545	8.63609	7.40238	13.218
NPPC	2.0276	0.209575	2.72723	0.0146241	1.34506	0.194066	TRUE	FALSE	6.79258	3.35006	2.49064	1.83143	1.46416	5.12373	3.21685	2.23349	0.365009	1.89359	1.66679	0.872881	17.5892	5.97255	2.28858	7.52608	3.4192	4.26985	11.5258	3.52631	0.821608	8.03999	4.89229	4.06515	2.71772	3.62571	2.11835
DGAT2	-1.34349	0.213122	4.06546	0.0676183	5.4619	0.0038124	FALSE	TRUE	294.398	395.521	72.4145	106.218	312.597	54.8659	285.754	107.352	28.8279	578.116	605.51	75.852	178.888	83.0212	91.2124	623.961	902.782	70.9253	11.7147	140.343	59.6046	531.1	511.956	66.3589	39.4355	500.604	131.669
XKR4	1.48167	0.213674	-1.89911	0.420675	-2.81386	0.0464422	FALSE	TRUE	2.88162	1.94484	5.47252	0.261719	0.50112	2.24169	2.44245	1.04235	0.851555	1.1923	0.0001	5.55416	6.99576	3.89947	6.86555	1.75033	4.75711	10.9117	6.80213	3.35	9.76691	3.24581	1.63083	1.3185	0.362449	0.377767	6.27013
H2AFX	-1.34453	0.214249	1.58405	0.103395	2.1298	0.00655105	FALSE	TRUE	17.3892	23.3803	10.9777	8.89514	12.1783	11.8636	13.0764	37.2232	19.3543	7.38465	17.5038	6.74852	17.0026	19.7688	6.2117	11.2078	14.4256	6.87914	20.7974	11.2991	13.0634	26.5197	39.7208	11.6531	34.2299	34.9227	12.0477
RP11-640M9.2	1.27826	0.215001	-1.6115	0.172857	-2.05991	0.0129452	FALSE	TRUE	190.605	149.114	307.16	181.46	82.762	160.064	273.728	140.146	670.076	58.9872	7.57829	203.889	104.49	169.072	283.91	154.386	113.778	280.539	312.661	254.962	228.039	244.032	160.074	322.264	195.099	264.537	308.501
CALN1	-1.37792	0.215528	-2.53832	0.0160677	-1.84214	0.201947	TRUE	FALSE	1.56681	2.15895	3.97708	1.83143	0.796993	7.57881	0.297947	3.12684	6.81174	0.841662	1.00011	2.61844	2.39861	3.01101	3.59629	1.40028	2.08129	3.79543	0.377991	1.5869	1.00417	2.72924	3.32679	0.988897	2.65733	2.34164	5.42283
TCTEX1D2	-1.38849	0.215621	-2.16498	0.0109698	-1.55923	0.152346	TRUE	FALSE	8.82974	12.26	19.1162	5.55383	10.5839	17.9968	8.98661	19.6087	21.5964	7.13571	12.5322	14.1047	6.57684	5.88376	10.3912	7.32215	7.39403	9.91076	11.0749	9.30174	8.69434	13.8506	19.4985	55.288	10.1373	13.2772	14.9476
THSD7A	-1.33317	0.215988	-2.54105	0.00118232	-1.90603	0.0248357	TRUE	FALSE	3.6017	4.80166	9.15211	0.523338	1.79774	4.48327	8.16111	2.97795	7.54156	3.50656	3.33347	6.74432	3.59787	5.03472	13.4041	2.62544	9.36547	10.4373	4.91268	8.11039	13.8745	3.61436	4.69661	7.58087	1.87224	3.09697	9.15095
SCARNA10	-1.53727	0.21912	-2.07974	0.026645	-1.35288	0.284224	TRUE	FALSE	172.355	264.955	358.454	141.274	146.194	401.672	207.54	596.762	485.087	191.099	521.673	262.787	84.9474	114.316	80.0971	36.7549	87.8562	157.744	199.338	159.738	393.405	116.911	211.598	559.563	400.975	281.505	527.275
HIST1H2AM	-1.20774	0.220345	1.668	0.172439	2.0145	0.0133619	FALSE	TRUE	54.3654	65.659	32.5931	24.3307	65.6284	54.7589	8.29367	54.8832	14.3584	63.6288	46.6983	26.5133	55.607	99.8178	44.789	47.7813	53.9271	33.9209	58.9976	32.4666	23.0023	66.659	92.8663	31.8613	109.625	78.9845	31.541
KCNN4	1.37788	0.220645	-1.76416	0.257151	-2.43079	0.0232951	FALSE	TRUE	26.5586	19.275	46.8534	41.0743	29.0586	52.8375	58.9143	30.9697	11.069	13.8156	2.50013	17.5351	42.3738	20.9283	61.4622	11.5516	22.8932	45.7813	11.7147	40.9042	92.0094	24.2673	2.41358	11.0966	8.75687	4.53211	83.0362
NCF4	-1.27511	0.220852	-2.25975	0.0165441	-1.77219	0.201208	TRUE	FALSE	1.92158	2.45023	4.34228	3.92438	2.55757	2.88214	0.476656	2.82906	3.77083	1.75333	1.16678	2.14238	0.599728	3.06036	3.92322	1.40028	2.97323	9.72564	1.32272	1.05796	1.36928	4.20445	2.93542	2.19743	1.69106	3.02144	8.7273
GIMAP6	-1.49108	0.220962	-2.2243	0.00930652	-1.49174	0.130956	TRUE	FALSE	6.24974	9.31885	13.9013	2.35467	12.0276	14.0901	7.32714	10.4079	4.13574	7.85458	4.50015	6.98235	7.39551	10.1187	15.6926	5.60083	19.7714	19.214	5.47951	6.34728	17.982	7.52367	7.82761	9.55847	6.462	3.55017	23.5551
AWAT2	-1.41918	0.221471	3.78222	0.29962	5.36766	0.0291863	FALSE	TRUE	296.586	420.909	78.4157	102.031	193.046	22.2025	133.734	109.138	39.6536	688.67	1204.62	167.733	111.331	33.8111	10.1348	818.394	719.655	24.6698	0.566936	90.8001	3.28613	502.317	628.414	146.891	15.6415	387.789	212.755
LINC00969	1.4301	0.222586	-1.49013	0.0425174	-2.13104	0.00232328	FALSE	TRUE	142.316	99.5147	212.07	293.227	171.792	291.856	197.982	68.048	145.042	78.6716	70.6176	256.803	82.141	91.8932	187.198	51.2608	41.2781	100.31	232.938	173.639	202.838	87.1604	67.017	252.322	115.148	111.833	260.191
LRP4	-1.45464	0.223827	-3.66201	0.000898101	-2.51747	0.0185822	TRUE	TRUE	11.5402	16.7868	42.2604	21.4529	18.8661	62.7645	22.2791	42.7323	90.0111	11.2208	15.8336	77.1222	3.39799	8.04563	29.0965	2.45042	6.24368	10.6745	10.0142	19.0416	27.475	9.36768	8.34944	17.4688	12.1388	15.1823	23.4703
ATP6V0B	-1.26066	0.224091	1.67457	0.152629	2.11106	0.0116243	FALSE	TRUE	7.28753	9.18708	4.35188	4.97086	8.61765	1.60123	1.07235	8.78476	1.70301	5.82083	4.00015	1.98369	8.59476	6.41678	6.2117	9.45133	12.3386	5.45589	3.02322	7.22884	2.73846	16.0061	12.5893	4.61448	9.3608	13.5206	10.5066
COL21A1	-1.26686	0.2243	-2.45205	2.53581e-05	-1.93553	0.000641935	TRUE	FALSE	18.3668	23.2682	45.0362	12.0346	10.6932	31.2755	9.76949	20.2495	55.4662	17.9532	18.8336	49.9868	29.9815	40.2278	59.8276	20.8278	20.5147	34.6325	24.7519	35.2622	34.2296	13.4983	19.895	39.8816	18.1175	20.4697	54.9901
RBP5	-1.35132	0.225385	-2.84452	0.0107235	-2.10499	0.142705	TRUE	FALSE	1.31756	1.78045	3.74783	1.83143	1.00085	0.747296	2.56159	1.63792	1.82465	0.280617	1.16678	1.34894	0.799604	2.56677	1.96166	0.700191	2.52726	3.79543	2.26744	1.23427	5.84193	1.25403	2.6745	6.92168	0.845582	1.43524	7.54108
PPP1R1C	3.68286	0.22545	5.90576	0.00123216	1.60358	0.0242801	TRUE	FALSE	8.00808	2.17442	1.35598	4.70924	1.16764	3.73608	17.5135	5.50913	0.0001	3.71695	2.33346	3.88794	7.19564	4.39305	0.327026	10.8515	1.78398	2.37218	8.12475	0.529032	0.0001	6.63854	0.84808	0.439565	5.31455	0.830968	0.0848301
TNNI2	-1.7301	0.225828	-14.1621	1.10694e-05	-8.18573	0.000277532	TRUE	TRUE	10.8848	18.8318	154.152	64.62	59.5614	442.992	7.38671	50.6236	176.373	3.36631	18.167	328.889	1.19936	3.85011	42.8274	3.32553	2.37861	25.8558	2.64533	11.8129	78.9565	1.69659	2.6745	29.8838	2.8385	1.5863	107.438
KRT34	2.90489	0.227589	6.9546	0.00364365	2.3941	0.0600726	TRUE	FALSE	4.54037	1.563	0.652857	14.9308	0.966645	1.61437	10.1878	0.459824	0.243373	0.491005	2.87143	0.555506	0.599728	1.74357	0.336542	0.700191	1.34982	0.711725	3.60797	0.881653	0.553127	2.16455	1.51177	0.442314	3.6409	2.71931	0.765899
CST6	1.36099	0.230814	3.29073	0.00458477	2.41789	0.071203	TRUE	FALSE	54.0855	39.7397	16.4357	87.9041	9.24776	15.2642	22.4578	13.6982	11.6772	47.6179	8.66687	8.25185	13.5917	20.8296	5.23092	50.5817	109.857	10.9117	20.4062	28.0335	6.93728	118.681	85.059	40.7605	71.4433	42.5255	32.4517
MVB12A	-1.51835	0.23087	-2.66923	0.0137236	-1.75798	0.167368	TRUE	FALSE	1.9479	2.95759	5.19939	2.61629	3.70657	7.47206	1.01278	0.893455	5.59538	1.54294	2.83347	1.66632	2.79836	1.43151	1.96166	0.525168	3.4192	3.32102	1.70061	1.76321	12.0489	2.06539	4.17477	7.58087	3.32164	5.43851	1.94889
G6PD	-1.51516	0.234025	1.99065	0.0286332	3.01615	0.0015806	FALSE	TRUE	55.9926	84.8377	28.1278	59.1261	55.7836	27.9666	59.1524	60.0038	14.2316	76.8615	180.171	38.2439	25.5842	20.9283	23.5388	74.385	114.466	17.3163	21.5399	32.0886	21.5419	97.2912	121.523	38.1236	34.0004	93.7374	44.0596
RGS5	-1.48895	0.234206	-2.83073	0.00669802	-1.90116	0.094798	TRUE	FALSE	10.4939	15.6249	29.7054	3.40115	12.491	12.8092	9.59078	20.5473	12.7719	7.57406	7.50019	9.68004	18.1888	12.8335	30.4042	7.87612	37.7589	29.1767	13.2263	14.8102	63.8039	12.9819	7.50146	11.9755	11.1121	11.5567	67.0216
TRIM55	-1.74511	0.234591	2.28245	0.267	3.98313	0.0267348	FALSE	TRUE	6.58655	11.4943	2.88574	4.186	6.4679	0.320327	1.42977	4.0202	0.729919	12.4831	25.5004	4.36401	4.91099	1.82639	0.0001	14.702	18.2849	0.948933	0.0001	5.64204	0.0001	14.6784	20.0907	7.91048	0.302058	10.1216	8.81203
CYP1B1	-1.41808	0.235443	3.42582	0.00432217	4.85808	0.000197352	TRUE	TRUE	38.5537	54.672	11.2538	28.5166	35.2937	8.64622	126.764	161.548	13.5017	7.99484	16.667	5.71285	16.19	32.0835	7.51941	19.4276	21.704	12.8093	28.3419	45.6645	11.775	36.8066	34.8325	8.4598	44.3879	89.5828	21.6063
NTM	1.35916	0.237564	-1.75411	0.127677	-2.38413	0.0100143	FALSE	TRUE	3.89472	2.86553	6.83178	6.01733	2.74289	3.30911	3.15728	3.42463	6.08192	2.73514	1.50012	3.8086	2.79836	1.62895	2.61551	2.62544	3.71652	6.40472	3.21217	3.35	20.0814	5.2371	2.93542	3.62569	5.37494	3.62571	8.72731
CXorf36	-1.41388	0.238428	-2.10251	0.0266545	-1.48705	0.262269	TRUE	FALSE	3.20296	4.52861	6.73425	0.261719	3.41006	2.88214	2.50202	5.36023	2.6761	3.85721	1.83345	2.61844	7.19563	4.59049	9.15404	1.22526	13.3792	9.48843	6.2353	3.35	10.2233	2.65548	2.87019	5.05395	1.69106	1.43524	11.7776
MMP19	-1.28822	0.239494	2.05478	0.024106	2.64702	0.00134506	TRUE	TRUE	3.16649	4.07915	1.54104	0.784957	2.5761	1.06752	1.31063	2.0846	1.09483	3.99747	3.83348	2.06304	3.39799	5.52832	1.63473	5.60083	6.68965	3.08381	2.83428	4.05524	1.36928	3.5406	2.80496	0.659298	3.86516	5.06084	1.35578
CTD-2554C21.2	1.42669	0.240497	-1.6385	0.0824885	-2.33764	0.0058568	FALSE	TRUE	4.65357	3.26179	7.62489	2.35467	3.35446	5.01699	9.70991	0.59567	10.5825	3.22605	0.500106	5.71285	3.79774	5.82447	13.4041	1.92535	4.4598	10.2001	11.5258	5.81835	6.75472	2.21291	2.21789	3.73555	2.47615	3.32357	5.59229
ALOX15B	-1.80659	0.242367	2.51317	0.185194	4.54028	0.016864	FALSE	TRUE	127.606	230.533	50.7751	34.5337	51.8535	8.43273	143.264	91.8665	22.8677	212.351	605.838	90.2136	41.7098	15.0052	7.19248	193.039	332.99	10.6745	3.59006	41.6093	3.55997	382.52	409.769	89.6507	9.8439	295.333	173.609
SYT17	-1.26541	0.244345	-2.00003	0.0244169	-1.58054	0.240505	TRUE	FALSE	3.07524	3.89143	6.15056	6.01734	4.09576	9.28667	1.90632	7.74251	3.28428	3.08579	2.16679	13.0125	3.59787	3.85011	4.57707	0.175123	1.78398	3.32102	3.21217	5.11311	3.74252	3.46684	3.13111	6.81181	3.14046	3.24804	5.16864
LRRC6	-1.29246	0.24571	-2.85849	0.00240141	-2.21168	0.0383617	TRUE	TRUE	2.77405	3.58533	7.9296	1.30819	2.96528	2.0282	3.57427	2.38238	10.8258	1.47282	2.16679	5.15745	2.79836	2.51741	6.2117	1.05024	5.20308	9.72564	5.8574	4.40787	3.8338	3.1718	5.41413	20.655	2.95929	3.62571	4.99918
ITGA8	-1.60433	0.245757	-3.7054	0.0414143	-2.30963	0.345788	TRUE	FALSE	4.32825	6.94392	16.0379	1.30819	3.24327	2.7754	6.01661	8.78476	1.94628	4.97928	6.00017	5.71285	4.19749	4.93601	2.94244	5.95087	14.2711	39.3767	6.61319	4.9368	25.5581	3.68812	9.98018	12.9643	1.87224	3.39911	37.0272
CCM2L	-1.48361	0.247343	-2.44215	0.00652154	-1.64609	0.0868841	TRUE	FALSE	1.52377	2.26067	3.72127	0.784957	1.81627	1.49449	1.3702	1.78681	2.79774	1.33256	0.500106	1.66632	0.599728	1.72767	5.23092	1.40028	3.71652	5.6931	2.45639	3.87893	5.65938	2.4342	2.54404	3.07636	1.81185	2.11504	4.15188
CDCA5	-1.2195	0.249486	1.67777	0.057594	2.04604	0.00399087	FALSE	TRUE	6.91152	8.42857	4.11946	2.87791	4.91119	3.41585	3.5147	8.93365	6.69011	5.04941	5.66683	2.30107	5.19687	11.5501	5.55785	9.62635	10.7034	4.98147	6.61319	4.9368	2.28207	7.37615	9.84972	3.40595	15.0376	10.8769	4.32134
CLDN7	1.33328	0.25011	-2.15124	0.0285484	-2.86821	0.00175121	TRUE	TRUE	9.72319	7.29269	20.9169	12.0346	10.6377	23.0564	11.3183	13.5493	11.1906	11.9922	1.83345	9.9974	17.5892	6.36741	35.635	2.2754	5.35174	11.6233	3.40111	16.7496	31.1261	14.1621	1.43514	12.0854	5.0126	2.41717	32.6211
PRR15L	1.66464	0.250386	-4.07181	0.00213323	-6.77809	0.000103935	TRUE	TRUE	1.37151	0.823907	5.58451	1.83143	1.51976	6.19115	2.919	1.48903	2.18956	1.89359	0.666774	2.22172	1.19936	0.789845	11.7694	0.525168	0.297413	3.32102	0.189045	1.23427	10.3146	1.99163	0.0653292	3.07636	0.422841	0.528834	5.59229
MAPK8IP2	-1.15631	0.251851	3.19302	0.00442989	3.69212	0.000226343	TRUE	TRUE	27.408	31.6922	8.58373	12.558	22.4057	4.59002	10.5439	14.1449	6.32519	29.8052	29.1671	11.2669	17.5892	19.4476	12.4233	86.6367	69.869	6.40473	11.5258	27.5046	4.19892	42.6334	48.7918	10.3275	7.97178	22.207	13.1333
HAO2	-2.27666	0.255186	2.08301	0.200948	4.7423	0.0202822	FALSE	TRUE	19.2904	43.9177	9.26084	2.61629	11.2492	0.640554	2.79986	36.3299	4.0141	54.981	125.167	23.5652	9.19439	3.10972	0.980879	39.2053	64.2199	2.37218	0.189045	11.4603	0.0001	43.2237	68.6856	14.7222	2.1138	31.12	27.7915
ST6GALNAC4	-1.40737	0.256555	1.54393	0.313735	2.17289	0.0380828	FALSE	TRUE	7.30477	10.2806	4.73129	6.01734	5.55981	4.8035	5.77834	8.18919	4.74392	6.17148	6.83351	4.04663	3.39799	4.68921	1.96166	8.57621	24.5284	4.26985	2.26744	3.52631	6.57216	20.4317	18.7209	4.50462	5.79769	10.1971	6.94797
ICAM5	-1.0402	0.256599	2.15877	0.242899	2.24554	0.026518	FALSE	TRUE	1.83167	1.90529	0.848479	6.27896	3.33592	0.533811	0.476656	2.0846	0.243373	1.33256	1.16678	1.19026	0.199976	2.02382	2.61551	0.875214	1.18935	0.474517	3.77901	2.46845	0.273936	0.442663	0.782851	0.439565	1.26832	2.19057	1.01686
MAL	1.17768	0.257779	-2.82827	0.0150167	-3.33079	0.000887769	TRUE	TRUE	11.6052	9.85428	32.8225	12.5578	17.68	35.225	10.9013	5.50912	10.0959	22.3713	3.33347	26.8183	10.9933	6.95973	64.4046	6.30092	12.1899	18.5023	7.18002	25.9178	53.6719	13.7195	4.82706	6.92168	8.81727	2.41717	46.9406
LPCAT3	-1.22524	0.259562	2.65859	0.00634713	3.25743	0.000349697	TRUE	TRUE	72.4796	88.8052	27.2624	31.9193	69.9298	16.8132	33.2721	40.6446	18.4302	92.3043	143.733	30.5743	49.4817	33.903	33.2925	163.867	145.396	26.7694	22.3009	62.3351	23.9085	137.66	122.469	21.5896	49.0316	92.0312	46.7215
POPDC2	-1.61754	0.26056	-2.14148	0.0445025	-1.32391	0.344243	TRUE	FALSE	1.95271	3.15859	4.18169	3.40115	2.96528	5.33721	2.08503	8.33808	4.13574	1.26243	1.66679	5.95088	0.99948	2.41869	0.653953	2.2754	2.67592	5.21868	2.83428	4.58418	3.8338	1.25403	1.109	2.30729	1.50989	1.51077	6.01594
RTP4	-1.36419	0.261009	1.91985	0.0299994	2.61904	0.0019863	FALSE	TRUE	8.36792	11.4154	4.35862	8.63353	15.4005	2.24169	12.6288	15.0382	1.58137	15.7091	17.0003	6.18891	6.79588	13.3764	1.30781	2.45042	5.5004	5.21868	3.96795	3.87893	7.85006	6.49102	8.74082	6.92168	10.2667	12.3876	3.55876
WNT3	-1.54775	0.263993	-2.97134	0.00521287	-1.91978	0.0667421	TRUE	FALSE	4.95644	7.67132	14.7273	3.66277	6.09725	8.64622	5.71877	12.2093	37.0992	6.9429	4.16681	9.44201	1.39923	1.48087	7.19248	0.525168	1.78398	5.93031	1.70061	4.23155	23.9151	8.40879	11.6109	14.8321	11.2933	19.7899	10.7608
IFI30	-1.72051	0.26403	2.84822	0.133942	4.90039	0.0124696	FALSE	TRUE	20.3834	35.0699	7.15656	44.7515	77.9069	0.0273737	18.2088	22.7728	4.98413	48.3229	40.188	0.00010012	0.0001	24.9572	0.000100065	7.1966	26.4857	5.27953	6.83647	44.5405	27.9579	18.5238	22.5916	14.3356	19.2272	21.1164	4.66777
ANPEP	-1.26872	0.26515	-2.44905	0.00727825	-1.93033	0.0870909	TRUE	FALSE	6.68597	8.48263	16.3743	4.97086	7.59836	18.1463	0.536225	12.656	10.9474	6.10135	5.66683	6.98235	11.9927	9.23025	29.4235	3.8506	17.2443	22.0605	6.42424	7.22884	13.7832	12.9082	4.76184	5.16381	6.70357	3.47464	24.4871
AP000330.8	1.90251	0.265376	2.36689	0.0411777	1.24409	0.320778	TRUE	FALSE	3.69957	1.94458	1.56305	0.784957	1.51961	0.640554	12.4501	1.19124	1.09483	1.40269	1.83345	2.38041	3.79774	2.36933	3.26936	3.32553	1.0407	1.42335	2.45639	2.11583	0.456493	3.68812	3.52248	2.30729	1.69106	1.96397	0.932131
RCCD1	-1.61964	0.266273	-2.35091	0.0129521	-1.4515	0.136587	TRUE	FALSE	5.12625	8.30266	12.0513	3.92438	9.674	11.208	5.36135	25.3118	31.2607	5.04941	4.66682	14.2026	1.79898	3.06036	5.23092	1.75033	2.22995	8.06518	9.44737	4.9368	5.75065	5.82718	7.17532	9.33874	7.85101	9.36625	11.3539
ZBED1	2.15362	0.267441	3.04063	0.0311218	1.41187	0.261326	TRUE	FALSE	5.05945	2.34928	1.66395	1.04658	1.59388	1.17426	2.97857	2.23349	1.09483	1.12217	1.50012	0.872881	19.7878	3.30716	1.96166	4.72571	2.97323	2.8466	5.8574	3.52631	2.28207	2.36044	1.69606	1.97769	2.59694	1.96397	1.10159
TMEM52	-1.30838	0.268792	-2.47169	0.00702033	-1.88912	0.0831574	TRUE	FALSE	0.890807	1.16551	2.2018	1.83143	1.3715	3.41585	0.595794	1.9357	4.01411	0.350746	1.50012	1.82501	0.799604	0.987282	2.61551	1.22526	0.89204	2.13497	0.377991	1.05796	1.91695	0.737705	0.521934	1.09876	1.20793	1.05757	0.593211
TBX18	1.59717	0.27039	-1.43375	0.215119	-2.28994	0.0241803	FALSE	TRUE	25.1676	15.7577	36.0841	7.84867	14.8445	18.8935	53.553	20.3984	7.6632	13.7454	10.1669	21.1055	19.9877	16.9796	38.5774	15.0521	23.4878	43.8836	50.6374	15.6917	78.9561	27.9553	18.5252	33.8389	12.5615	5.96725	45.7544
RSPO1	1.18945	0.270502	-3.36991	0.00139677	-4.00833	7.63482e-05	TRUE	TRUE	7.12591	5.99093	24.0136	9.94162	7.2092	25.6182	5.8379	5.80691	22.5029	7.08315	1.16678	11.981	13.3918	6.41678	42.1735	2.2754	8.02756	32.7348	7.55791	15.6917	24.554	6.93358	2.02221	6.70195	3.98594	1.5863	25.8428
ZNF236	-1.75243	0.270618	-2.20028	0.0368445	-1.25556	0.29122	TRUE	FALSE	1.09875	1.92548	2.41756	0.784957	1.05645	1.70798	4.22953	6.7682	6.93338	0.491005	2.33346	1.90435	0.199976	0.394973	0.980879	0.175123	0.148757	1.42335	0.755881	1.23427	3.28613	0.885226	1.95698	2.08756	1.26832	1.51077	1.01686
DOC2GP	-1.04858	0.270835	-2.34988	0.0369601	-2.24101	0.291636	TRUE	FALSE	1.55444	1.62996	3.65276	2.35467	3.50272	5.23047	5.12307	2.98757	5.47374	0.771522	0.500106	5.0781	0.0001	1.23408	1.96166	0.350145	0.148757	1.66056	2.0785	1.05796	2.19079	1.03275	2.02221	2.96649	0.724799	1.5863	4.66026
KDR	-1.38506	0.271325	-3.07897	0.00123406	-2.22299	0.0186869	TRUE	TRUE	7.16541	9.9245	22.0621	1.30819	7.89489	11.1013	5.00393	9.67812	13.2585	7.92471	2.83347	5.71285	16.7897	9.03281	32.0389	5.95087	26.3123	24.6698	3.59006	9.8735	23.4587	9.1464	6.06642	24.0608	7.60944	7.70452	42.1959
FADS2	-1.51868	0.273108	3.54079	0.238463	5.37733	0.028239	FALSE	TRUE	2787.56	4233.42	787.272	686.214	960.205	60.6295	3797.06	1757.47	732.105	4547.98	11487.4	1214.47	1201.32	224.733	136.655	5622.78	6593.84	276.582	10.3921	1022.22	44.5439	6293.55	7490.78	1691.1	141.194	4330.7	2142.09
C16orf86	1.28229	0.273584	-1.57967	0.308227	-2.02559	0.0405466	FALSE	TRUE	2.57188	2.00569	4.06272	2.61629	2.29811	1.28101	5.00393	0.297885	3.40592	1.75333	1.00011	1.58697	2.99824	3.30716	6.53863	1.40028	2.37861	7.82798	2.45639	2.46845	4.65531	2.65548	1.50037	1.86783	1.69106	2.79484	5.3381
CYP2C19	2.34263	0.27367	3.33603	0.0301074	1.42405	0.249271	TRUE	FALSE	19.5739	8.35552	5.86743	78.4857	8.32114	11.3148	2.20417	11.6137	6.93338	14.7938	8.16686	7.20947	12.992	4.04754	10.7887	4.20065	3.56786	3.79543	19.2725	13.576	2.73835	6.3435	5.08798	1.53823	18.2987	12.4631	2.62109
HIST1H2BB	-1.29686	0.274468	1.60597	0.309086	2.08272	0.0408891	FALSE	TRUE	5.2967	6.86911	3.29814	2.09305	10.9157	5.5507	0.476656	11.3159	0.973192	6.10135	4.16681	4.12597	7.39551	9.37832	3.92812	3.32553	2.22995	1.66056	10.2031	4.40787	0.730329	4.50363	7.17532	5.60328	8.2748	5.36298	3.81295
THRSP	-1.32503	0.27447	3.03368	0.0810047	4.01971	0.0070221	FALSE	TRUE	221.956	294.097	73.1637	137.35	227.633	18.0395	341.81	182.691	22.3812	324.208	661.174	73.5517	136.116	47.4342	31.0581	396.252	373.277	11.3861	4.91268	86.0397	2.64718	425.155	490.524	235.773	9.84392	284.006	190.473
PAPLN	-1.43933	0.275501	-2.25486	0.00564565	-1.5666	0.0674349	TRUE	FALSE	7.08103	10.192	15.9667	7.32543	9.98904	11.3148	5.00394	11.9115	23.111	3.64682	2.00012	20.1534	3.99762	8.73665	15.6926	11.7266	11.298	28.2279	8.31369	17.8075	9.49308	10.4741	6.19688	7.03155	6.16004	13.5961	12.7096
ACSL1	-1.29265	0.276471	2.28593	0.149224	2.9549	0.0153689	FALSE	TRUE	388.059	501.624	169.76	338.799	388.584	157.766	54.9236	219.915	84.051	620.145	549.993	246.117	345.38	168.111	167.061	683.789	904.429	150.627	56.8728	150.568	28.1139	875.872	990.977	150.188	128.693	640.417	374.156
C19orf44	-1.35845	0.277054	-2.11157	0.0112976	-1.5544	0.117143	TRUE	FALSE	1.96384	2.66778	4.1468	2.35467	5.31887	5.01699	2.56159	3.16689	6.33516	1.82346	2.83347	4.99876	0.799604	0.641768	1.63473	0.350145	1.63532	2.8466	1.88955	2.64476	3.52555	3.02428	2.15522	4.83422	2.90746	2.94591	3.98242
PPP1R3G	-1.28142	0.278768	-2.3565	0.0137789	-1.83897	0.135828	TRUE	FALSE	1.68159	2.15483	3.96266	1.30819	2.59463	2.24169	0.417086	2.38238	1.45974	1.33256	1.00011	1.90435	1.39923	2.61613	6.2117	0.875214	3.71652	7.35356	3.96795	1.76321	5.93321	1.91787	1.95698	1.42836	2.23459	1.20864	5.16864
CCDC11	1.41709	0.278775	-1.44114	0.320644	-2.04223	0.0440247	FALSE	TRUE	3.97921	2.80801	5.73461	4.97086	5.07797	3.30911	3.39556	3.46338	9.85265	3.29618	1.66679	6.90301	6.39613	3.30716	2.28858	1.22526	1.0407	6.40472	6.61319	2.64476	1.36928	3.09804	2.54404	7.36114	2.8385	2.71931	8.38838
CIDEA	-1.65246	0.279512	3.30971	0.0178621	5.46917	0.00123242	TRUE	TRUE	92.5305	152.903	27.9573	52.5855	100.353	13.9833	86.9119	51.8147	9.0012	153.515	376.004	44.9087	30.3812	18.8553	8.50019	209.502	269.217	21.1116	10.2031	50.9539	2.19079	172.747	190.535	41.8592	24.3983	165.494	82.1036
ABCA6	-1.1611	0.279533	-2.68223	0.000179947	-2.31008	0.00301977	TRUE	TRUE	13.0407	15.1415	34.9781	4.186	11.1195	18.4665	26.7468	14.5916	17.3941	12.2026	12.1669	19.836	12.992	16.5847	25.1734	9.10128	21.5553	50.0511	19.8394	17.6312	52.8504	11.2854	17.2859	35.0475	7.97178	10.1971	61.0058
ARG2	1.39443	0.280518	3.40683	0.00348988	2.44316	0.0440094	TRUE	TRUE	6.20167	4.44745	1.82036	5.75572	3.37299	1.49449	3.81254	1.78681	0.365009	12.1325	9.33354	1.82501	8.19501	3.80075	2.28858	6.47594	6.24368	1.42335	1.51166	0.529032	1.46056	9.07264	4.69661	1.97769	2.65733	5.81618	3.72822
ADCY4	-1.76057	0.281955	-3.53053	0.00541843	-2.00533	0.0632315	TRUE	FALSE	0.924678	1.62796	3.2646	0.784957	0.722863	1.81472	0.0596694	4.31799	3.77083	0.911781	0.166769	2.85648	0.799604	1.62895	7.19248	0.350145	1.48667	1.89777	1.70061	2.99738	1.36928	1.40155	1.17423	1.53823	1.38911	0.528834	5.67702
HIST1H3J	-1.2036	0.283381	1.71049	0.110497	2.05875	0.010863	FALSE	TRUE	80.7526	97.1939	47.2102	35.8419	90.1138	69.2018	11.2866	68.9914	16.1795	116.087	102.414	26.977	91.943	189.3	93.855	77.2714	73.1022	64.6224	129.428	55.8239	19.1805	72.789	104.527	42.1835	111.374	93.2791	45.4818
MFSD4	1.16949	0.283611	-2.27364	0.140968	-2.65901	0.0148357	FALSE	TRUE	27.974	23.9197	63.6028	22.2377	33.3397	52.9442	5.65919	13.4004	17.5158	39.9037	1.00011	37.8471	77.3521	37.3648	194.521	23.8032	41.0294	68.3162	10.2032	59.0642	30.3047	34.0038	4.04431	15.2715	10.629	2.11504	92.1018
REEP6	-1.68947	0.284055	2.77451	0.067016	4.68744	0.00588174	FALSE	TRUE	7.31164	12.3528	2.63529	4.186	7.11653	3.94956	2.20417	9.52922	2.6761	9.39743	8.83353	3.41188	2.79836	1.53023	0.653953	11.2016	22.7446	1.89777	1.32272	2.11583	1.00417	21.4644	33.6584	3.84542	5.91847	13.294	3.64349
SAMD5	1.44581	0.284849	2.23089	0.00865488	1.54301	0.0915377	TRUE	FALSE	26.4432	18.2896	11.8532	7.32543	7.22773	14.0901	36.6353	15.0382	7.17665	12.2026	11.8336	15.3928	44.5724	32.8239	22.8849	22.578	19.1768	15.8931	46.2917	16.5733	4.74659	17.4813	25.4395	6.59208	24.4587	18.2037	8.04946
SYT12	1.22254	0.285159	2.15179	0.00404237	1.76009	0.0487336	TRUE	FALSE	9.50273	7.77292	4.41621	12.2962	4.67027	5.23047	12.9862	17.1227	5.23047	9.53768	9.33354	5.23679	4.997	4.59049	7.84633	15.7521	6.68965	2.8466	5.76304	2.64476	3.37741	8.4088	9.65403	2.08756	6.28082	7.47791	3.47403
TACR1	-1.43278	0.286388	-3.00715	0.00786424	-2.09883	0.0841284	TRUE	FALSE	4.75916	6.81883	14.3115	0.523338	3.6695	4.16305	4.46781	3.12684	6.44683	6.10135	5.16683	7.14104	5.59663	10.1681	34.6543	6.47594	15.1631	21.5861	2.64533	10.0498	24.5541	5.01581	4.10954	6.37235	7.24709	3.09697	9.57461
DPH7	-1.46982	0.286804	-2.31382	0.0203347	-1.57422	0.177228	TRUE	FALSE	2.49004	3.65992	5.76154	4.44762	4.13282	7.89903	3.81254	2.82906	2.06792	1.12217	5.66683	6.03022	0.199976	0.937922	3.92322	1.40028	0.594727	3.08381	2.64533	5.64204	12.1402	2.72924	4.56615	6.37235	3.5632	4.90978	4.57553
UBIAD1	-1.20515	0.287317	3.67927	0.0150849	4.43406	0.00106876	TRUE	TRUE	80.2275	96.6857	21.8053	39.7662	72.0871	16.9721	35.8013	25.9074	13.1368	220.97	226.169	35.3874	36.1777	33.12	21.9042	179.224	171.252	20.8744	15.3047	49.8959	24.2802	96.7	110.758	17.9083	17.876	84.2963	23.9787
FADS1	-1.10882	0.288849	3.66753	0.244986	4.06662	0.0317486	FALSE	TRUE	227.923	252.725	62.1463	58.8644	58.9337	3.94956	11.2587	115.987	23.8409	734.982	388.168	191.297	73.3545	30.8001	24.5196	499.695	615.43	24.907	2.64533	34.3807	1.55184	429.659	557.918	57.8996	12.9239	220.18	169.205
FGFBP1	1.41205	0.28969	2.32707	0.0098126	1.648	0.0991447	TRUE	FALSE	15.2424	10.7945	6.55004	17.7902	8.59913	7.25857	2.85943	18.3139	15.5696	29.7349	8.00019	5.71285	11.1932	24.4822	4.25014	21.0028	8.47353	6.87914	16.2494	7.75777	7.57623	11.2117	4.76184	2.52703	11.8972	5.96725	2.62673
EBP	-1.26859	0.290441	1.88398	0.0368254	2.39	0.00299862	FALSE	TRUE	142.741	181.08	75.7659	87.9041	100.538	54.5454	128.849	103.927	78.2124	168.661	219.836	52.367	96.1404	82.7259	71.27	313.991	268.325	63.3347	51.2043	106.668	65.2643	213.168	369.328	110.306	82.0117	197.294	110.827
FBF1	1.51857	0.29201	-1.577	0.124009	-2.39478	0.0131643	FALSE	TRUE	7.13896	4.70111	11.2581	10.3412	6.2258	13.6746	18.7433	10.1814	25.8536	1.60952	3.80176	11.1035	4.12933	3.16244	5.66238	2.66006	0.521631	4.07088	9.88157	3.51983	7.63247	3.33963	2.93277	13.1119	6.40708	7.26327	8.95566
DHCR7	-1.49298	0.292822	2.2289	0.191652	3.3277	0.0232575	FALSE	TRUE	26.203	39.1205	11.756	30.8712	16.7532	14.517	30.7976	48.3901	10.8257	40.1141	80.1675	14.282	9.19439	5.92318	6.86555	27.6537	44.4483	3.32102	2.64533	8.81563	6.48088	61.8853	72.2096	13.184	6.462	36.2563	24.5718
TNNT3	-1.34734	0.293518	-8.99295	6.95017e-06	-6.67457	0.000111813	TRUE	TRUE	4.70208	6.33532	42.2855	6.01733	12.7875	52.9441	21.7429	20.5473	99.3762	0.420876	2.33346	36.7363	1.39923	2.02382	17.3272	0.700191	1.33801	10.4373	3.02323	7.93408	49.2903	2.803	2.28312	49.5498	1.50989	1.43524	22.6231
CLMP	-1.20404	0.294514	2.94107	0.186101	3.54118	0.0225609	FALSE	TRUE	22.6379	27.257	7.69715	7.32543	24.3146	5.44395	55.4594	8.18919	5.47374	26.7194	44.8341	6.03022	16.3899	7.10779	8.17326	42.5307	49.2056	5.93031	2.26744	8.2867	4.47275	28.8406	49.3789	10.5473	1.57028	26.7391	15.5057
ANKRD6	1.57171	0.296303	-1.31534	0.161502	-2.06733	0.0189023	FALSE	TRUE	3.00273	1.91048	3.9496	1.56981	1.77921	3.09563	9.11422	1.04235	4.50065	1.47282	2.33346	3.8086	2.59849	1.67831	2.61551	1.40028	2.67592	3.32102	1.88955	1.93952	8.5803	3.31932	2.02221	4.06515	2.65733	1.8129	1.60997
SLC12A4	-1.30125	0.296303	-2.0771	0.00443509	-1.59624	0.0500025	TRUE	FALSE	19.7592	25.7116	41.0418	33.2257	32.0439	55.7195	35.3459	55.9836	67.5084	8.90652	12.1669	55.3025	12.3924	18.8552	22.5584	7.52607	9.96009	21.5861	21.9177	26.0941	36.9679	17.9239	23.5478	28.0214	20.8352	27.0411	40.6705
SOX8	1.73121	0.296571	-1.97229	0.0403357	-3.41446	0.00345076	FALSE	TRUE	6.23177	3.59965	12.2909	5.4941	3.93253	11.1013	19.658	2.97795	7.17665	2.59752	0.503456	2.85647	11.1932	3.65398	21.9042	1.75033	3.71652	10.9117	0.755881	11.284	25.4668	6.04974	1.897	6.70194	2.35537	0.831765	12.2079
TMEM56	-1.57646	0.297615	2.61312	0.0992898	4.1195	0.0102545	FALSE	TRUE	48.2105	76.0024	18.4494	21.7145	17.9927	9.50016	14.3563	56.4304	13.8667	86.8872	172.989	14.0439	38.776	10.7604	5.55785	100.638	130.96	8.06518	3.96795	14.8102	3.28613	107.393	113.369	39.2224	11.9512	90.7071	54.0531
OAS1	-1.37688	0.297715	1.93231	0.0375881	2.66057	0.0031988	FALSE	TRUE	15.3649	21.1556	7.95154	10.2032	20.7193	2.98888	4.16996	16.5272	9.24447	25.8777	15.1669	8.25186	7.59539	9.2796	5.55785	20.4778	16.501	7.35356	9.82526	9.34456	1.73439	30.0943	53.6836	8.56967	14.6752	28.023	19.9116
AFAP1L2	-1.21852	0.29799	-2.43145	0.00159996	-1.99542	0.0204784	TRUE	FALSE	4.85351	5.91407	11.8011	1.04658	3.2997	11.7418	2.38288	3.12684	9.0012	6.10135	4.33348	9.12463	11.7928	10.8097	17.981	3.8506	9.51412	13.2838	3.96795	6.55032	20.264	5.45837	5.67504	4.28488	4.22751	4.00337	8.72731
P2RY2	-1.17966	0.300555	-3.38701	2.18874e-05	-2.87118	0.000340856	TRUE	TRUE	7.75809	9.15189	26.2767	14.6508	14.8445	40.4553	10.6035	11.3159	30.8957	6.03122	8.83354	27.2149	5.19687	5.4296	33.6735	1.5753	5.50039	12.3349	6.61318	11.4603	27.4749	8.33503	7.37101	25.7088	9.05882	8.45985	12.4554
ABHD12B	-1.22288	0.303425	2.42568	0.142356	2.96631	0.0166494	FALSE	TRUE	8.99454	10.9992	3.70804	12.2962	7.80223	2.34843	0.238378	14.5916	1.21646	9.25717	9.50021	2.85647	7.19563	2.91228	3.26936	17.6774	13.5279	0.711725	1.13377	3.35	0.456493	17.9977	24.5263	5.16382	6.16004	11.7833	13.6416
KCNK5	1.60095	0.303853	-1.56977	0.158947	-2.51312	0.0192323	FALSE	TRUE	53.6025	33.4817	84.1434	92.6132	52.7803	167.158	156.549	80.8487	32.1121	55.7529	13.3336	50.4627	34.9784	20.4841	72.5777	16.8023	29.4341	49.1022	6.2353	63.2956	167.314	55.3205	3.52248	24.6102	10.5686	4.15444	109.81
IDH1	-1.33991	0.305382	1.69616	0.121064	2.27271	0.0136846	FALSE	TRUE	121.113	162.281	71.404	69.8525	105.781	50.7025	127.481	109.733	63.3725	145.309	360.34	60.857	115.929	56.9601	37.9235	236.631	204.552	46.2558	31.9319	69.9952	39.7975	194.058	251.075	148.87	47.7094	139.809	123.453
CCDC88C	-1.42763	0.30573	-2.58944	0.00168655	-1.8138	0.0206481	TRUE	FALSE	6.15471	8.78663	15.9372	13.081	13.4388	23.4834	10.1865	24.1207	29.0712	3.99747	9.50021	17.6144	4.59673	3.85011	11.7694	1.5753	3.12189	7.82797	2.83428	6.17097	15.2436	6.56478	5.93596	9.7782	6.4016	4.15444	12.7096
DOCK8	-1.35717	0.305952	-2.16092	0.0367257	-1.59222	0.256533	TRUE	FALSE	9.16131	12.4335	19.7968	4.44762	4.61465	12.062	7.9824	13.4004	16.2994	20.3376	28.1671	69.4257	7.39551	12.1918	9.48096	6.1259	8.9195	21.1116	11.5258	14.105	9.67564	7.0811	9.45835	9.55847	8.39452	8.61092	10.7608
DLG2	1.24581	0.306911	-1.63234	0.0584124	-2.03358	0.00564933	FALSE	TRUE	5.73221	4.60118	9.35688	2.61629	3.2062	8.326	6.67188	8.33808	10.2176	4.41825	1.50012	8.09316	6.79588	7.3546	3.92322	4.37567	2.67592	12.8093	11.9037	6.17097	5.1117	4.42573	4.24	14.1729	4.65025	3.32357	12.2012
DHRS11	-1.21898	0.307094	1.7806	0.0902131	2.17051	0.00957031	FALSE	TRUE	23.5159	28.6653	13.2067	30.3479	29.1148	18.3598	10.3056	15.1871	5.47374	42.3579	52.334	15.8689	15.9902	15.0052	14.0579	37.455	41.9213	15.1814	6.80213	15.3391	6.75472	32.9709	35.4194	11.3163	11.8973	25.0016	18.6408
RP11-35J10.5	1.50841	0.307446	-1.37879	0.290655	-2.07978	0.0439321	FALSE	TRUE	9.85314	6.53214	13.5854	28.1484	2.84333	11.4848	5.69721	2.96672	17.4497	11.3182	6.97379	16.1252	2.19045	3.14717	3.90843	4.53353	3.8506	6.61689	11.4823	18.2673	24.9162	5.14387	5.32874	4.37818	10.3112	8.87946	23.8039
FAM188B	1.55488	0.309523	-1.53158	0.110271	-2.38143	0.0124291	FALSE	TRUE	7.37666	4.74419	11.298	10.8931	8.2709	12.7184	20.7474	3.6595	15.8267	1.61097	8.01911	13.264	3.69885	3.03024	10.5873	4.24982	0.408294	2.6579	10.4237	5.89619	11.2985	2.8176	5.12385	13.0119	4.57182	3.54546	11.0191
RP11-274B21.1	1.35415	0.310097	-1.49633	0.0680323	-2.02626	0.0068961	FALSE	TRUE	252.192	186.235	377.361	345.679	179.878	247.663	524.992	198.501	876.982	112.092	99.0016	303.027	142.683	142.219	214.072	132.797	117.29	254.3	345.843	316.412	268.556	210.804	219.414	470.319	202.642	217.168	383.968
GJB7	1.71526	0.310583	-1.32106	0.128031	-2.26596	0.0150775	FALSE	TRUE	1.47546	0.860199	1.94918	1.04658	0.852589	2.45517	5.71877	2.68017	3.64919	0.280617	0.500106	2.30107	0.99948	0.246895	1.63473	0.350145	0.297413	0.948933	1.13377	1.05796	2.09951	0.885226	0.717622	1.3185	1.38911	0.528834	1.18632
CRISPLD1	1.30565	0.311961	-1.55601	0.267948	-2.0316	0.0400865	FALSE	TRUE	19.5453	14.9698	30.4126	14.1275	15.419	46.6463	22.6961	10.2737	6.32519	21.7402	11.8336	20.6295	38.776	20.0893	42.8274	16.9773	17.0956	26.093	10.581	27.8572	48.5606	19.3253	11.6762	10.1078	12.1388	5.51404	42.1111
EGFLAM	-1.39547	0.312457	-2.57835	0.0462219	-1.84767	0.296557	TRUE	FALSE	1.88369	2.62863	4.85682	0.261719	0.834057	0.747296	3.69341	7.74251	4.25738	1.05204	1.50012	1.90435	2.19873	1.9251	3.92322	0.175123	3.71651	1.66056	2.45639	0.881653	14.7872	2.87676	2.08744	3.18622	2.35537	2.34164	8.38837
D2HGDH	-1.46091	0.312661	-2.62203	0.0121582	-1.79479	0.106972	TRUE	FALSE	17.5899	25.6971	46.1211	22.2377	22.7393	38.107	44.5578	92.611	153.262	4.90915	12.0002	37.371	1.79898	5.7751	19.6157	4.72571	5.94637	17.3163	34.0103	27.3282	32.6778	17.8502	16.8945	47.5723	10.629	22.2825	23.0467
ACO1	-1.18327	0.312678	2.81678	0.174836	3.33301	0.0227314	FALSE	TRUE	11.6823	13.8233	4.14739	3.66277	9.30335	2.24169	1.3702	2.68017	2.79774	18.8649	12.8336	4.36401	5.19687	3.94882	5.55785	33.6045	28.8395	4.74427	3.02322	6.87621	1.09544	25.0787	29.9403	3.73555	2.65733	16.1643	8.64257
RP13-608F4.8	1.76031	0.312905	-1.33585	0.251465	-2.35151	0.0369161	FALSE	TRUE	37.6543	21.3908	50.3008	6.62512	8.71583	10.8754	100.238	1.22475	86.6135	2.02326	1.91685	15.2004	20.8145	29.5254	76.2398	35.4826	27.9594	77.257	90.2797	54.1194	41.6401	25.5473	22.7733	52.7375	20.224	24.8914	41.8423
MGST1	-1.25849	0.313506	2.42556	0.0749904	3.05255	0.00789492	FALSE	TRUE	863.309	1086.46	355.921	806.571	1264.46	184.237	127.836	681.779	156.425	1586.68	2391.36	488.202	804.874	306.53	163.463	2190.04	1506.63	198.306	146.622	412.032	18.6209	1080.55	1411.43	845.971	163.299	717.494	792.143
DDX59	-1.41343	0.313892	-2.05015	0.00840002	-1.45048	0.0787941	TRUE	FALSE	30.0413	42.4613	61.5891	40.2894	39.6412	82.2989	31.2146	110.33	108.622	28.8934	44.6672	75.6945	22.3862	20.2374	25.1734	18.2025	20.6634	30.3628	30.6092	31.736	39.6151	25.3737	27.3965	64.6018	43.3615	45.0183	66.3442
ALDH3A1	1.40216	0.314386	2.41362	0.00210064	1.72136	0.0240498	TRUE	FALSE	131.772	93.9774	54.595	71.6838	53.6327	37.5733	210.274	85.6137	97.3086	107.65	83.5005	51.891	48.1702	80.0124	24.8465	110.79	111.491	49.3395	121.87	156.915	107.618	78.4069	46.052	35.8165	305.329	134.602	32.3669
ANKFN1	-1.14056	0.316218	-2.35152	0.0492313	-2.06173	0.306556	TRUE	FALSE	1.26311	1.44066	2.97024	2.09305	0.407812	2.34843	0.0001	2.38238	2.18956	0.98191	0.166769	2.93582	1.79898	2.12254	2.94244	0.525168	1.18935	3.79543	1.70061	2.46845	2.00823	1.91787	1.95698	2.96649	1.08722	0.830968	4.57553
CFI	-1.29907	0.316864	-2.75139	0.049349	-2.11796	0.30645	TRUE	FALSE	1.89197	2.45781	5.20554	0.0001	0.945251	2.34843	2.68072	0.148993	2.91938	1.75333	1.83345	3.41188	1.79898	2.07318	5.23092	3.15051	6.09502	8.30239	1.70061	3.52631	5.65938	2.36044	1.5656	5.38355	1.69106	3.47464	8.38838
RP11-152F13.8	1.76031	0.317896	-1.32333	0.283104	-2.32947	0.0444186	FALSE	TRUE	37.6543	21.3908	49.8293	6.62512	8.71583	10.8754	100.238	1.22475	86.6135	2.02326	1.91685	11.4291	20.8145	29.5254	76.2398	35.4826	27.9594	77.257	90.2797	54.1194	41.6401	25.5473	22.7733	52.7375	20.224	24.8914	41.8423
RBM33	1.29163	0.318488	-1.76109	0.0045757	-2.27469	0.000350086	FALSE	TRUE	12.4966	9.67504	22.0077	9.68	10.3226	20.6013	23.9471	14.1449	25.9087	6.52212	6.50017	21.7403	11.9927	11.3033	18.9618	9.80137	5.94637	14.9442	21.7288	14.4576	13.6006	7.30239	6.71872	38.7829	8.99845	8.00665	21.5215
ELOVL3	-1.35247	0.319218	3.47327	0.108863	4.6975	0.0128403	FALSE	TRUE	100.744	136.254	29.0056	58.6027	74.7412	12.062	51.349	93.2068	20.0701	106.597	151.502	21.5816	39.7754	6.5155	0.327026	144.569	138.102	5.93031	0.377991	44.9593	0.547772	392.848	377.743	69.7652	11.8368	203.261	101.761
MIA	-1.05397	0.321655	-3.32918	0.000407488	-3.15869	2.94976e-05	TRUE	TRUE	4.94162	5.20832	16.4515	7.32164	6.90836	21.9822	5.2987	13.3968	20.0639	4.06409	2.66465	15.2284	5.79448	3.2054	13.7249	3.84716	1.48295	15.8865	4.90902	11.1026	22.9036	5.16015	1.17114	8.01716	3.13769	1.73468	13.8055
RGS11	-1.33526	0.322023	-2.19634	0.00876567	-1.64487	0.0788778	TRUE	FALSE	1.08844	1.45335	2.39058	0.261719	1.09351	1.81472	2.1446	1.78681	2.79774	0.491005	0.500106	3.01516	0.799604	0.987281	1.96166	0.875214	0.89204	2.37218	1.70061	1.23427	2.5559	1.77035	3.84863	0.87903	0.664407	1.28417	3.72822
FABP9	-1.12811	0.323693	3.11334	0.00830683	3.51218	0.0749286	TRUE	FALSE	15.5425	17.5336	4.99223	12.8194	0.796992	6.40464	2.68072	10.7204	0.0001	14.7273	0.666774	0.0001	28.5824	50.8399	2.61551	10.5015	19.6228	4.03264	10.9589	0.0001	0.0001	23.2346	49.3134	0.109966	20.8352	8.30878	26.7748
AWAT1	1.1997	0.323891	15.0737	0.183976	12.5646	0.0256215	FALSE	TRUE	95.5501	79.6452	6.33885	177.639	71.1274	3.09563	102.162	24.4185	12.0421	219.294	102.001	9.60069	55.7655	11.1059	0.0001	194.625	161.293	1.66056	0.0001	32.4413	0.273936	12.3181	172.988	19.8859	2.59694	61.7865	4.15188
KIT	1.46628	0.326376	-1.45194	0.199837	-2.12895	0.0288853	FALSE	TRUE	23.0005	15.6863	33.3954	6.01734	6.20845	20.8148	17.037	20.2495	13.8667	30.1557	7.50019	19.4393	32.1801	7.99627	17.0003	7.35105	17.9876	27.2791	14.9268	22.0389	82.6985	36.6591	20.5473	34.7178	39.6773	22.9623	51.3465
CLCA2	-1.11114	0.327849	2.15037	0.0466756	2.38936	0.00483454	TRUE	TRUE	75.3547	83.7295	35.0427	44.2137	62.3042	41.4161	8.22068	64.7684	24.0841	137.383	93.6679	48.4	84.5477	76.1118	47.0775	128.292	158.765	44.5953	42.8907	57.4774	10.4971	72.8017	83.6245	18.3478	84.4879	73.1165	45.9238
DQX1	-1.13165	0.331986	-2.29878	0.0170814	-2.03135	0.130156	TRUE	FALSE	3.55079	4.01825	8.16247	6.01734	6.04166	5.44396	6.91016	3.87131	25.6654	3.22605	2.16679	8.17251	0.199976	1.72767	4.57707	0.700191	1.93264	4.98147	3.77901	6.6999	5.75065	3.46684	3.58771	3.84542	4.10673	6.11831	6.86324
DGKA	-1.50201	0.333354	-2.73928	0.00583929	-1.82374	0.0535339	TRUE	FALSE	59.804	89.8263	163.82	65.1433	81.8761	207.724	132.959	269.347	465.146	43.0596	61.6676	132.504	20.3875	24.5808	53.6161	16.9773	26.3124	82.7859	58.1953	87.6266	145.771	63.1392	60.9243	115.911	78.5704	106.276	107.099
UGT1A7	2.11923	0.333703	27.8457	7.02288e-05	13.1396	0.000899612	TRUE	TRUE	13.1868	6.22245	0.473566	7.32543	2.80133	0.536572	3.15887	6.40248	0.124499	24.897	2.34092	0.557834	13.4776	4.68015	0.980879	13.3018	3.58439	0.0001	6.87089	1.5869	0.182657	3.9864	3.26294	0.572943	32.4763	25.1205	0.833047
FA2H	-1.06359	0.334121	5.10922	0.0481349	5.43411	0.00517384	TRUE	TRUE	68.0535	72.3811	13.3198	37.4116	69.6262	17.0789	66.0626	60.7483	10.4608	114.942	88.5012	15.1548	36.1776	10.7604	10.1348	144.567	135.129	2.60939	0.944827	26.0941	6.57216	135.203	88.7118	14.7222	9.11922	99.4777	29.8251
TNFRSF25	-1.2454	0.336634	-2.36286	0.00596913	-1.89726	0.0537899	TRUE	FALSE	59.3733	73.9437	140.29	160.896	110.512	170.785	23.1726	125.665	312.246	31.9789	20.3337	200.899	17.3893	42.1036	108.867	25.5534	41.624	110.539	92.0165	123.594	42.9924	63.9503	46.4433	71.5231	60.0293	81.2742	104.472
PTPDC1	-1.18457	0.337458	-2.10051	0.00819053	-1.77322	0.0699702	TRUE	FALSE	4.92019	5.82833	10.3349	4.70924	6.33817	9.28668	10.4843	5.80691	26.6385	3.99747	5.66683	9.83872	2.34377	2.86293	4.57707	1.92535	3.56786	4.50706	7.36897	8.81563	8.1239	4.42573	6.39257	10.2177	4.10673	7.17578	9.48987
AC107016.1	1.42848	0.338876	-1.91385	0.0354215	-2.73389	0.00371325	FALSE	TRUE	15.774	11.0425	30.189	16.1728	15.8258	48.7979	24.1179	10.8267	9.45302	14.7559	5.23497	12.3133	25.6973	11.3493	54.8271	7.51402	11.5243	17.3782	5.23473	18.2261	38.9008	26.4474	11.3831	24.1593	6.25196	3.96989	35.6826
KRT77	1.14007	0.339777	-2.05241	0.265142	-2.33989	0.0447028	FALSE	TRUE	474.671	416.352	974.219	765.77	364.519	279.666	284.214	244.631	485.816	1075.81	115.335	890.242	345.58	608.248	3140.94	325.717	403.027	1417.76	547.375	1360.87	488.966	162.791	36.5948	130.521	290.111	197.595	959.843
EMILIN3	-1.29435	0.342819	2.09436	0.23859	2.71084	0.0393054	FALSE	TRUE	8.77116	11.353	4.18799	1.04658	2.84284	1.06752	7.68456	4.31798	3.64919	5.68057	22.8337	5.39547	7.79526	4.44242	1.96166	26.0785	22.7446	4.50706	2.26744	5.46573	6.846	15.9324	17.6772	2.53595	3.68398	10.4993	7.54108
ALDH9A1	-1.09224	0.343193	1.85238	0.203287	2.02325	0.0318607	FALSE	TRUE	328.557	358.864	177.37	101.508	244.034	112.506	54.6848	113.307	78.4556	703.397	521.506	236.598	461.718	328.741	334.773	630.607	608.898	211.827	172.32	341.69	67.7289	371.237	405.465	121.185	132.982	307.27	255.885
DHRS2	-1.16935	0.344272	12.2827	0.0645684	14.3627	0.0076924	FALSE	TRUE	32.735	38.2785	2.66513	64.3584	99.6294	4.8035	50.9917	13.8471	0.486646	47.1971	54.834	2.06304	20.7872	6.41678	0.0001	49.1813	31.6639	0.0001	0.0001	43.5487	0.365215	28.3978	45.3344	9.4506	0.966365	10.9539	4.15187
DIP2C	-1.38611	0.346049	-2.61889	0.00142727	-1.88938	0.0146535	TRUE	FALSE	7.21493	10.0007	18.8951	3.40115	7.9134	23.2699	8.45896	24.8652	46.222	4.69876	3.66681	18.8046	5.99638	5.62703	8.50019	5.25078	7.8789	16.8419	8.12475	6.87621	13.3268	8.92512	14.4158	11.3163	12.8635	8.76199	12.8791
KRT9	1.31911	0.346349	-1.59255	0.0392364	-2.10075	0.00433642	FALSE	TRUE	3.60878	2.73578	5.74718	2.09305	3.29886	5.33721	7.74413	2.68017	10.8257	2.87541	3.1668	5.23679	1.99886	1.62895	3.92322	2.45042	1.48667	3.32102	2.64533	2.64476	8.30646	3.68812	2.6745	5.38355	5.37495	4.30551	3.64349
PTGFR	1.43049	0.347563	-2.04219	0.0824084	-2.92134	0.0104688	FALSE	TRUE	3.65232	2.55319	7.45874	3.92438	2.18692	3.52259	1.48934	5.50912	4.62229	1.47282	0.333437	1.50763	5.39675	1.97446	9.15404	0.700191	3.27055	8.77681	3.77901	1.41059	7.48495	7.08111	4.30523	4.94408	5.37495	1.43524	19.6575
PDE10A	1.34605	0.348341	-1.7795	0.128014	-2.3953	0.0180494	FALSE	TRUE	1.08347	0.804926	1.92804	0.784957	0.759928	0.533811	0.476656	0.893455	0.851555	0.701393	0.333437	1.34894	1.79898	0.888563	1.30781	0.875214	0.89204	2.60939	2.0785	1.5869	2.19079	1.10651	0.782851	3.95529	0.845582	0.302234	2.62673
C3orf70	1.4985	0.348678	-1.58587	0.207369	-2.37642	0.0334934	FALSE	TRUE	9.9629	6.64861	15.7999	4.70924	5.85633	10.7811	22.5173	10.7204	6.69011	10.0286	5.66683	8.25185	20.3874	5.08408	15.6926	4.55069	9.21681	18.0279	8.31369	10.9314	41.7144	5.08957	3.52248	3.29609	4.10673	2.19057	21.9452
MRVI1	-2.18504	0.349595	-3.79109	0.0151585	-1.73502	0.110722	TRUE	FALSE	1.66603	3.64035	6.31607	0.261719	1.22324	3.52259	1.84675	4.16909	0.973192	2.3845	1.16678	2.85647	3.19811	2.41869	8.82711	1.05024	5.79771	8.06518	0.944827	12.8708	7.75879	2.43419	1.17423	2.08756	1.20793	0.302234	16.4377
NKD2	-1.13158	0.351305	-2.85377	6.10827e-05	-2.52194	0.00071549	TRUE	TRUE	5.16663	5.84645	14.7444	5.23248	5.98606	20.2811	9.23336	8.78476	16.6643	2.66501	2.6668	13.0125	2.39861	4.39306	8.17326	2.10037	5.20308	8.06518	10.3921	5.46573	24.2802	4.05693	8.15376	13.0742	5.25416	6.11831	14.4042
HSD3B1	1.1893	0.353379	17.6548	0.241568	14.8447	0.0417974	FALSE	TRUE	197.043	165.68	11.1609	126.1	143.663	3.30911	119.139	28.4386	3.52756	313.408	345.171	7.29972	135.316	15.0053	3.59629	542.746	442.105	1.42335	0.0001	32.6176	0.182657	330.816	215.711	51.3077	8.81727	102.726	18.6407
TMEM97	-1.57728	0.356609	1.96889	0.0909485	3.1055	0.0123052	FALSE	TRUE	45.8473	72.3141	23.2858	16.2205	21.5162	11.1013	57.9016	70.4263	23.4759	63.1866	184.336	27.1357	26.5836	11.5995	6.86555	72.9846	73.5848	9.01402	15.6826	25.2125	12.3227	98.396	123.479	49.7695	15.8227	68.3584	46.6017
C10orf131	1.71219	0.356811	-1.88018	0.0644825	-3.21922	0.00815402	FALSE	TRUE	2.87751	1.6806	5.41022	0.261719	2.40931	2.13495	7.92284	1.63792	2.79774	2.31437	2.16679	2.77713	1.79898	1.38215	2.28858	1.05024	1.18935	6.40472	4.53479	0.529032	7.48495	4.35197	3.97908	10.3275	0.78519	0.151167	9.06622
SPARCL1	-1.17809	0.356927	-3.07802	0.00344149	-2.61272	0.0306433	TRUE	TRUE	17.4568	20.5657	53.7324	1.83143	16.4568	30.4216	35.3844	40.9455	15.3263	15.2882	21.667	16.6622	26.3837	13.6725	33.3465	13.3018	30.1773	41.9859	5.85741	10.4024	118.115	22.6446	21.4605	82.07	18.963	9.7439	91.9318
KRT86	2.58441	0.357333	8.332	0.00130594	3.22394	0.0128296	TRUE	TRUE	20.8399	8.06369	2.50119	104.462	2.73218	10.3382	13.7606	17.9976	1.82385	0.911759	6.40293	1.46868	11.3122	15.157	0.980879	6.65038	10.0859	2.29814	13.4258	0.881653	0.182657	7.88318	5.05862	0.290605	8.31303	6.19362	2.62647
LMOD1	-1.71999	0.358101	-5.25279	0.00429072	-3.05397	0.0369831	TRUE	TRUE	2.69842	4.64125	14.1742	0.523338	3.68804	7.25857	8.22068	20.2495	4.25738	1.26243	2.83347	1.34894	4.19749	1.48087	5.55785	1.05024	3.27055	18.2651	2.45639	2.11583	35.3249	2.72924	2.28312	3.84542	1.14754	1.20864	37.5355
HSPA12A	-1.29942	0.358822	-2.28763	0.000774667	-1.7605	0.00787625	TRUE	FALSE	7.46857	9.70478	17.0853	6.01734	13.0654	14.3036	6.55274	16.2294	33.0852	9.39743	9.16687	20.4708	6.59601	4.63985	8.82711	4.72571	7.58159	16.3675	8.69158	13.0471	12.8704	11.0642	9.98018	12.9643	6.70356	3.92784	17.7934
MYO3B	1.46719	0.360646	2.66762	0.00228111	1.81818	0.0209311	TRUE	FALSE	6.37949	4.34809	2.39145	3.13953	2.20545	2.98888	14.8925	3.57352	0.243373	4.27799	5.8335	4.28466	8.59476	7.10781	3.92322	4.02562	5.20308	3.32102	7.74686	4.23156	1.55184	3.46684	3.45725	1.20863	4.89181	3.17251	1.60997
CIT	-1.16456	0.364071	1.88179	0.127726	2.19147	0.0193132	FALSE	TRUE	9.63937	11.2257	5.12244	1.83143	4.05863	3.30911	2.79986	7.59362	4.25738	6.38187	5.3335	3.01516	16.3899	16.5848	4.904	12.4397	15.0144	9.72564	8.88053	13.0471	5.38554	14.1621	15.3942	5.38355	14.2296	12.7791	4.99917
SNX29P2	-1.14326	0.366063	-2.38793	0.000567584	-2.0887	0.0056934	TRUE	TRUE	3.76118	4.30002	8.98144	4.22995	4.66961	6.19115	1.54891	7.32775	14.1751	4.03277	3.1668	11.1717	2.00725	2.3586	5.55785	1.09434	2.70089	7.6568	5.10162	6.36209	6.42981	6.86259	4.01863	10.767	5.21203	3.79581	9.90211
MAPRE2	1.21584	0.367158	-1.94416	0.00149383	-2.3638	0.000140693	FALSE	TRUE	7.62803	6.27387	14.8301	12.8194	5.81926	15.2642	8.04197	9.9759	17.2725	10.8	4.16681	12.1397	7.79526	4.24498	11.4425	2.80046	6.39233	11.3861	4.34584	11.6366	17.343	8.26127	3.19633	15.4912	6.16004	4.75871	18.3018
RDH12	1.32904	0.367218	2.06665	0.00430386	1.555	0.0356933	TRUE	FALSE	29.0642	21.8686	14.0634	57.5563	13.7325	24.5509	11.914	23.3762	21.1649	32.8907	23.0003	8.56922	13.7915	17.8681	13.731	20.8278	14.5684	4.50706	26.6413	21.6863	14.7872	30.9057	25.8961	13.8432	37.9861	34.8209	11.3539
PDZD4	1.19874	0.36758	-2.17775	0.0153984	-2.61056	0.0016791	TRUE	TRUE	1.62188	1.35299	3.53205	1.56981	1.00085	4.91024	2.38288	1.19124	1.45974	0.631264	0.333437	4.20532	1.79898	1.62895	2.94244	0.700191	0.594727	4.03264	2.64533	2.64476	5.5681	1.91787	2.6745	2.08756	1.32871	0.755435	3.05038
WDR19	1.14609	0.368081	-1.74589	0.00253449	-2.00093	0.00024445	FALSE	TRUE	15.0648	13.1446	26.3014	13.6043	8.80298	25.9385	13.2841	22.6318	36.4911	10.3792	12.3336	26.4216	16.9896	10.8097	29.0965	8.75124	6.54099	17.3163	24.1851	11.8129	18.4384	16.5962	16.4379	30.1035	16.7286	15.7866	26.6054
KLRAP1	-1.5951	0.369057	-2.03483	0.0221233	-1.27568	0.139958	TRUE	FALSE	5.08425	8.10988	10.3456	3.92438	4.72585	8.53948	4.16996	28.993	23.5976	4.69876	6.83351	13.8853	2.79836	3.10972	8.50019	1.92535	2.22995	8.77681	5.8574	8.11039	5.38554	8.48256	5.74027	7.47101	8.81727	5.13638	6.60905
PITPNA-AS1	1.28797	0.36924	2.56657	0.00115029	1.99272	0.0108175	TRUE	FALSE	1.88666	1.46484	0.735094	1.56981	2.03866	0.533811	1.78718	1.04235	0.608282	2.17411	0.833443	1.03157	3.39799	2.1719	0.653953	1.22526	1.78398	0.711725	1.51166	1.41059	1.00417	2.58172	1.30468	0.659298	0.845582	1.1331	0.677941
SGIP1	1.6237	0.370384	-1.47131	0.0624368	-2.38897	0.00836024	FALSE	TRUE	4.92528	3.03336	7.24659	1.83143	1.35296	8.11251	13.8202	8.48697	13.1368	0.841652	2.00012	4.12597	5.19687	1.82639	3.26936	1.40028	2.22995	5.93031	8.50264	2.99738	8.58029	2.4342	4.24	7.36114	5.37495	1.1331	7.45635
COX14	-1.40909	0.372521	1.78379	0.0381369	2.51353	0.00476071	FALSE	TRUE	3.67697	5.18119	2.06132	6.54057	5.8934	2.13495	3.21685	10.2737	1.09483	2.24424	2.33346	2.61844	1.99886	2.81357	0.327026	4.55069	5.05443	2.13497	1.88955	2.29214	1.36928	4.86829	8.93651	3.84542	4.10673	3.85231	2.96565
NLRP1	-1.23983	0.372796	-2.6004	0.00101838	-2.09739	0.00951378	TRUE	TRUE	42.9095	53.2003	111.582	55.9866	66.5317	208.684	75.0572	106.309	175.399	16.1298	33.8338	101.48	12.208	24.4328	55.5776	18.0274	18.2849	63.8092	59.1399	68.056	97.4844	45.0678	37.8331	101.845	61.6593	70.3212	88.3741
C7orf63	1.19987	0.377586	-1.82846	0.0123544	-2.19391	0.00138469	FALSE	TRUE	9.90687	8.25664	18.1143	15.4356	8.98833	21.0283	13.5819	13.996	18.9754	8.34549	13.6669	20.1534	5.39675	3.99818	9.80789	5.77585	5.5004	7.11635	14.171	7.05253	17.8907	8.33503	5.67504	28.6752	8.21335	7.17578	21.2674
GRIN2A	-1.32031	0.378615	-2.41769	0.0116548	-1.83116	0.0800494	TRUE	FALSE	3.63439	4.79852	8.78684	4.70924	8.04317	7.79229	2.02546	3.27574	21.7731	6.66239	6.50017	9.68002	1.39923	5.08409	7.19248	8.40119	3.4192	6.40472	1.32272	8.11039	6.29832	2.13915	0.782851	2.08756	2.41576	3.17251	9.06621
PPP1R32	-1.04499	0.379164	-2.08615	0.0264056	-1.99634	0.155726	TRUE	FALSE	1.97688	2.06582	4.12407	2.61629	3.68805	6.08441	0.357517	1.63792	6.08192	2.10398	2.33346	8.1725	1.79898	1.53023	2.61551	0.175123	1.63532	2.60939	3.77901	2.29214	0.912886	2.50796	1.36991	3.29609	2.47615	2.0395	3.21984
NPR3	-1.30022	0.379334	-2.09902	0.0026846	-1.61436	0.0223384	TRUE	FALSE	23.3636	30.3779	49.0409	32.7025	47.2202	36.6127	43.9028	28.7364	55.3447	34.4336	8.5002	49.1932	23.3856	45.213	70.2893	16.4522	44.0025	62.3859	13.0373	36.849	45.7307	10.9166	21.8519	31.4219	12.0784	10.6503	41.3484
PCTP	-1.4226	0.38047	1.6673	0.249065	2.3719	0.0485912	FALSE	TRUE	7.53007	10.7122	4.51631	2.35467	2.79849	1.81472	8.39939	13.2515	3.16265	10.9403	16.667	2.38041	5.59663	2.41869	3.26936	11.0265	14.1225	4.74427	2.0785	3.87893	5.75065	15.8586	18.1338	5.60328	3.98594	14.427	9.40514
PRELID1	1.30225	0.381154	2.34812	0.00584462	1.80312	0.0440249	TRUE	FALSE	7.11064	5.46025	3.02822	5.3152	1.15655	0.675742	5.94668	7.66352	13.0521	4.53822	5.80808	1.82522	20.792	6.99059	1.58342	5.52242	12.8944	2.73063	7.45655	1.5484	1.10424	2.73602	3.99039	2.26788	4.57802	3.63009	0.986543
HIST1H2BM	-1.12137	0.381929	1.79806	0.00680711	2.0163	0.000742827	FALSE	TRUE	31.8487	35.7143	17.7128	16.7437	33.2932	32.0228	41.1846	25.7585	15.103	24.6155	39.3339	6.98235	27.6676	35.4893	13.7691	14.352	32.4072	10.2001	39.1118	27.6809	25.4061	37.5642	47.2773	20.7648	53.5503	44.4743	17.4545
LGALS4	-1.35904	0.381987	-2.65667	0.00423231	-1.95481	0.033096	TRUE	FALSE	2.20694	2.99932	5.8631	2.35467	2.40931	2.98888	2.44245	3.85028	7.90646	2.52475	1.00011	6.74432	1.19936	2.91228	14.7118	3.8506	1.93264	5.21868	1.88955	4.05525	3.28613	2.06539	5.87073	3.84542	1.32871	1.96397	2.20308
KLHL41	1.15095	0.382824	-1.85325	0.0315092	-2.13301	0.00401833	FALSE	TRUE	3.75055	3.25865	6.95072	1.83143	3.50272	4.05631	3.75297	3.12684	10.2176	3.01566	3.50014	12.6951	2.79836	3.65267	6.53863	5.07576	0.743383	6.16752	6.80213	7.05253	3.8338	3.46684	1.69606	7.69074	3.26124	2.79484	4.40607
TM7SF2	-1.15403	0.383537	2.47203	0.216069	2.85279	0.0408435	FALSE	TRUE	36.4253	42.0358	14.735	35.8419	33.4692	14.7305	115.566	43.9235	17.2725	22.7921	49.8339	12.2984	8.19501	4.3437	5.23092	34.6546	55.7462	5.45589	3.40111	15.6917	14.3309	60.2626	68.6216	25.5989	10.6894	64.6567	22.9619
MSRB1	-1.29209	0.383992	2.16586	0.0285038	2.79847	0.00360721	TRUE	TRUE	33.454	43.2254	15.4461	34.7862	26.3324	10.1406	24.2445	20.9939	8.14974	54.9092	95.8345	11.5843	16.9896	13.87	10.4617	56.7076	62.2872	15.1814	7.9358	23.6257	14.5134	53.3997	60.3351	25.9153	18.6592	42.5248	27.6221
GNB3	1.66975	0.386322	-1.40618	0.059961	-2.34797	0.00856774	FALSE	TRUE	1.55328	0.930245	2.18418	2.87791	0.982317	2.45517	5.06351	2.68017	2.43283	0.98191	0.666774	3.01516	0.399852	0.592409	2.94244	0.350145	0.44607	1.66056	1.51166	0.529032	1.73439	0.516423	0.261017	1.53823	0.724799	1.28417	1.6947
MAP7D2	1.36174	0.386616	2.40526	0.0171712	1.76631	0.107222	TRUE	FALSE	1.74499	1.28144	0.725489	0.784957	0.537539	0.640554	0.595794	0.446778	0.608282	2.03385	1.00011	0.952225	0.99948	2.31998	1.30781	3.15051	1.63532	0.711725	2.64533	1.76321	0.456493	1.69659	1.79316	0.109966	2.05341	0.755435	1.01686
GABRE	-1.15969	0.388239	-2.15416	0.0265664	-1.85753	0.151854	TRUE	FALSE	18.1987	21.1048	39.2028	24.5923	26.7793	31.4889	68.8031	53.3034	115.677	12.5532	30.167	65.5385	3.79774	5.87383	9.80789	2.80046	5.05442	18.5023	10.0142	17.4549	23.7325	11.433	14.8724	28.4554	11.5952	15.3334	20.4201
TSPAN1	1.17405	0.388308	-1.82163	0.0188486	-2.13869	0.00231845	FALSE	TRUE	2.9128	2.48099	5.30605	2.87791	1.22324	5.44396	3.09771	4.31798	4.37901	2.66501	1.33345	3.8086	6.19625	2.81357	8.17326	1.92535	3.4192	5.93031	1.13377	4.58418	5.1117	3.1718	1.17423	3.07636	2.23459	0.982035	6.52522
PLEKHG5	-1.29852	0.388651	-3.01044	0.00340804	-2.31836	0.0265862	TRUE	TRUE	85.3294	110.802	256.879	158.541	147.398	393.773	174.777	202.941	567.801	63.1165	68.3342	405.685	16.5898	48.372	129.463	34.8296	43.1105	99.6276	88.6154	212.983	240.702	70.7364	49.9005	75.0388	75.4291	113.376	142.94
PAQR6	-1.19568	0.389649	-2.11181	0.0376196	-1.7662	0.198935	TRUE	FALSE	6.60537	7.89791	13.9493	17.267	10.0447	27.5396	2.7403	17.2716	27.0034	3.01581	5.66683	21.6609	1.39923	3.99818	9.15404	5.4258	3.4192	5.45589	8.88053	9.8735	3.10357	5.90094	4.82706	9.119	8.21335	8.08218	8.55784
MCAT	-1.2431	0.390149	1.69939	0.0867862	2.11252	0.0135034	FALSE	TRUE	6.71059	8.34196	3.94883	3.13953	4.44787	0.984264	2.1446	3.27574	2.79774	9.53769	12.5002	3.57057	3.19811	4.93601	6.86555	9.97639	10.852	4.98147	7.55791	7.40515	2.09951	10.4003	11.6109	4.61448	7.73022	11.7078	5.67702
SYBU	-1.2002	0.390611	-2.02971	0.00249945	-1.69114	0.0199762	TRUE	FALSE	5.94537	7.13567	12.0674	2.61629	5.02238	10.3541	10.4247	6.55137	17.6374	5.54031	4.00014	11.0289	6.99576	4.3437	13.4041	4.37567	8.47353	6.87914	5.10162	14.2813	16.7041	8.70385	6.78395	6.04275	3.80477	7.62899	14.4889
ZNF833P	-1.42734	0.390639	-2.15418	0.0201566	-1.50922	0.120553	TRUE	FALSE	1.40352	2.00331	3.02344	1.84127	2.40163	3.97947	2.05354	5.22057	4.76405	2.68266	1.84605	3.84451	0.65544	0.461641	1.34405	0.527093	1.20524	2.15281	1.73467	1.43129	1.75491	0.371564	2.77059	4.4565	1.36194	0.689458	1.89123
GBP1	-1.25977	0.391684	1.94824	0.0687915	2.45432	0.0103116	FALSE	TRUE	36.918	46.5081	18.9494	101.43	150.265	14.8951	11.377	38.7083	19.2311	52.8253	30.7646	16.0873	28.9956	44.9352	29.8487	18.8065	26.3123	21.8082	30.5445	29.444	18.1645	25.6262	30.7319	16.055	25.7388	20.9036	15.5057
FGF7	1.30191	0.393404	-2.26145	0.0322675	-2.9442	0.00433366	TRUE	TRUE	20.9094	16.0606	47.2855	7.84867	22.1252	26.4722	40.5073	12.656	11.4339	30.7868	7.16685	15.8488	34.1789	16.4764	73.8854	7.35105	29.4188	61.9114	15.6826	27.3173	71.2889	18.809	10.4368	35.6059	12.1107	2.88739	81.8376
DPEP2	-1.16452	0.39538	-2.13286	0.0210651	-1.83153	0.122964	TRUE	FALSE	0.911971	1.06201	1.94511	0.784957	0.834057	0.640554	2.08503	1.63792	1.09483	0.911781	1.33345	1.98369	0.199976	0.888563	0.980879	0.875214	0.743383	1.66056	0.566936	1.41059	2.5559	0.663944	1.04377	2.74676	1.20793	0.604368	3.89769
GPC5	1.72461	0.395831	2.29412	0.00652358	1.33023	0.0457235	TRUE	FALSE	7.96901	4.62077	3.47367	1.30819	2.59463	3.94956	21.5642	7.59362	0.608282	4.0676	3.50014	16.7416	8.99452	6.2687	1.30781	3.67558	1.93264	2.13497	8.31369	5.11311	0.821608	11.3592	6.26211	1.20863	4.46907	3.70124	1.01686
HPN	1.57741	0.396699	3.98177	0.00312676	2.52425	0.023818	TRUE	TRUE	3.9056	2.47596	0.98087	1.30819	0.796992	1.06752	12.6288	5.65802	1.21646	1.12217	1.00011	2.06304	2.99824	3.10972	0.327026	3.15051	3.12189	0.711725	4.91268	0.881653	0.0913786	3.61436	2.21789	1.09876	1.50989	3.02144	1.27105
PCDHB5	-1.28099	0.397168	-2.29574	0.0348546	-1.79217	0.183048	TRUE	FALSE	1.70148	2.17957	3.90615	3.13953	1.76068	5.65744	1.07235	4.42374	1.94628	1.61307	3.00013	7.53776	0.799604	1.23408	5.23092	0.525168	2.08129	0.711725	1.51166	1.41059	1.55606	2.65548	2.54404	3.18622	2.29498	0.982035	5.42283
TMEM139	1.27789	0.397371	-1.73613	0.0765918	-2.21859	0.0120014	FALSE	TRUE	1.29902	1.01653	2.25526	0.523338	1.29737	0.96078	2.79986	0.59567	2.31119	1.40269	1.16678	1.2696	1.19936	0.54305	3.59629	1.05024	0.743383	1.18614	0.377991	2.82107	2.82974	1.77035	0.587163	3.51582	1.26832	0.377767	2.37254
RP13-228J13.6	-1.23247	0.399228	-3.22272	0.000301942	-2.61484	0.00268048	TRUE	TRUE	2.38597	2.94064	7.6893	2.09305	2.39102	4.37653	2.20417	5.65802	9.24447	1.33256	4.50015	4.44335	3.79774	3.45523	5.23092	0.875214	0.89204	5.52756	6.27606	2.82107	5.20298	1.18027	2.6745	14.5248	1.32871	1.1331	12.9638
KLHDC9	-1.22269	0.40244	-2.2901	0.00361977	-1.87301	0.0265222	TRUE	FALSE	1.15344	1.41029	2.64149	0.784957	1.11204	2.45517	1.48934	1.34013	1.21646	1.40269	1.50012	1.58697	2.39861	1.43151	3.26936	0.700191	1.63532	2.8466	0.566936	2.82107	3.10357	1.40155	0.913309	2.41716	0.483232	0.528834	4.23661
SNORD94	-1.18006	0.402845	-2.2782	0.0161025	-1.93058	0.0960777	TRUE	FALSE	88.2991	104.198	201.163	126.1	58.9145	182.636	277.534	263.391	165.789	40.1141	158.002	106.003	18.3887	42.5476	37.5966	20.6528	53.3678	104.846	95.6064	70.5243	222.446	38.1343	39.3986	316.854	89.8627	147.441	473.133
ABCB1	-1.22812	0.404102	-2.6171	0.0448259	-2.13097	0.218216	TRUE	FALSE	3.38263	4.15428	8.85269	0.261719	1.35296	1.60123	1.42977	2.23349	1.82465	1.47282	2.6668	3.96729	7.99514	3.60331	7.51941	2.62544	6.09502	4.50706	6.99108	10.4024	26.2885	3.68812	5.21844	16.8097	2.59694	1.66184	8.30365
CYR61	-1.14539	0.405512	-2.11265	0.00667573	-1.84448	0.0449485	TRUE	FALSE	15.9699	18.2918	33.7388	3.13953	11.4716	17.6126	14.7733	13.5493	40.3834	14.026	11.5002	18.4872	35.7779	23.4457	26.1542	16.4522	20.812	27.7535	12.8484	23.4494	44.6354	11.9601	10.3063	18.4576	18.7819	31.7997	76.4267
DCST2	-1.22863	0.406777	-2.338	0.0238911	-1.90293	0.131163	TRUE	FALSE	1.69689	2.08485	3.96734	4.186	3.00234	5.23047	3.21685	4.31798	8.14974	1.61307	2.6668	7.69644	0.199976	0.937922	0.980879	0.875214	0.44607	2.60939	1.51166	1.93952	2.28207	0.885226	1.63083	2.41716	1.08715	1.73737	2.37254
ZNF440	-1.13386	0.407454	-2.63417	1.17299e-05	-2.32318	0.000104328	TRUE	TRUE	11.0289	12.5053	29.0521	12.9975	9.11299	38.8455	11.9566	19.2443	49.4334	8.02392	13.4878	19.8138	6.596	11.6768	26.8081	9.86407	9.9669	14.9442	17.1941	10.0504	22.575	7.75041	13.8767	36.6015	13.8488	12.6263	23.395
TMEM11	-1.03896	0.409407	3.13207	0.0270587	3.25409	0.0038194	TRUE	TRUE	4.61674	4.7966	1.47402	5.4941	5.0965	0.854038	0.178808	3.12684	0.243373	4.76889	2.50013	0.952225	3.79774	4.19562	2.61551	11.5516	8.77084	2.13497	2.45639	5.28942	0.547772	4.94205	5.08798	1.64809	3.74438	4.30551	2.79619
RP6-206I17.2	-1.37709	0.411272	-2.04697	0.0197719	-1.48645	0.110658	TRUE	FALSE	1.50685	2.07507	3.08448	1.83098	2.63093	3.71189	2.38827	2.70439	1.82431	0.981665	3.16609	2.57192	0.99923	1.48051	1.33007	1.39993	0.456404	2.37159	1.32253	1.24185	5.20446	1.92133	2.31345	3.57111	1.2109	2.60693	4.09053
SAMD11	1.27438	0.411659	2.39739	0.00336804	1.88122	0.0239626	TRUE	FALSE	3.34462	2.6245	1.39511	3.13953	4.31815	2.66866	4.88479	1.78681	0.486646	1.61307	1.33345	3.8086	4.39737	4.936	1.30781	1.75033	1.63532	0.711725	2.0785	1.41059	0.730329	6.41726	3.91385	0.769164	2.47615	1.66184	0.677941
SEZ6L	-1.26368	0.412468	2.14291	0.00802582	2.70794	0.00102375	TRUE	TRUE	26.125	33.0136	12.1914	6.27895	15.7155	9.07319	31.9889	25.4607	6.69011	20.1973	21.8337	30.6269	48.1703	43.1399	6.2117	20.6528	18.5822	12.8093	21.3509	46.1935	13.5093	34.1512	70.4477	15.0518	26.2099	22.7357	3.55876
ABCA7	-1.1969	0.414139	-2.04341	0.0424812	-1.70725	0.203106	TRUE	FALSE	3.08848	3.6966	6.31102	11.2497	5.09651	9.07319	3.09771	8.33808	13.3801	1.82346	4.50015	8.64857	0.99948	1.13536	1.63473	0.875214	1.18935	1.42335	1.32272	2.29214	3.74252	2.803	2.41358	5.38355	2.53654	4.60764	7.20216
TFPI	1.42705	0.415183	-1.49005	0.0845053	-2.12639	0.0145382	FALSE	TRUE	14.9504	10.4764	22.2769	4.186	12.8986	11.8485	26.9851	9.827	13.3801	16.4805	6.50017	10.6322	17.5892	7.84819	21.5772	9.97639	18.8795	37.7162	28.5309	10.0498	30.2134	10.8429	12.0675	15.8208	5.0126	5.74064	37.0272
PDLIM4	1.20644	0.415807	-1.84929	0.0101215	-2.23107	0.00133421	FALSE	TRUE	24.0332	19.9207	44.4445	21.7145	16.3086	46.3265	22.994	25.3118	30.8957	17.0415	8.16685	22.6924	35.578	22.8533	51.9814	14.527	25.123	33.6836	13.2263	23.802	89.3628	36.1429	18.9166	22.7424	31.0415	18.8835	57.8708
PLAC9	1.37742	0.41775	-1.53688	0.15559	-2.11693	0.0308116	FALSE	TRUE	6.59888	4.79077	10.1417	2.09305	6.43103	5.44396	12.6288	2.97795	6.08192	2.31437	1.00011	3.09256	5.39675	4.44242	8.17326	3.32553	8.77084	8.77681	12.6594	3.35	22.3634	9.66247	7.50146	11.8657	4.71064	3.85231	15.3362
MYOM3	-1.24195	0.421709	-2.22965	0.0327596	-1.79528	0.161461	TRUE	FALSE	2.13325	2.64939	4.7564	1.56981	3.74364	5.76418	2.79986	1.78681	7.6632	4.41825	5.00016	9.44201	1.99886	1.77703	0.653953	2.27541	1.78398	2.8466	0.944827	2.46845	4.10764	1.54907	2.21789	3.84542	1.50989	2.41717	3.72822
SLC47A2	1.22375	0.423254	2.08224	0.0120748	1.70152	0.0701954	TRUE	FALSE	28.7903	23.5263	13.8266	29.0398	16.3642	9.60691	18.8836	20.1006	26.0303	24.896	11.5002	18.4872	10.5935	7.74948	14.0579	15.5771	20.8121	10.4373	49.5038	36.5711	10.8623	32.3072	33.2671	16.8097	49.5213	41.8457	4.32134
SLC2A6	-1.34644	0.426483	-2.00876	0.0317638	-1.4919	0.15519	TRUE	FALSE	0.961064	1.29402	1.93054	0.523338	1.27883	2.24169	1.19149	1.19124	0.973192	0.98191	0.333437	0.952225	1.19936	1.33279	1.63473	0.875214	2.08129	1.42335	0.944827	1.5869	3.0123	0.885226	1.5656	1.64809	1.08715	0.982035	3.55876
SLC16A11	-1.10356	0.427152	2.16046	0.0310182	2.3842	0.00481146	TRUE	TRUE	8.22319	9.07481	3.80623	15.6972	9.82225	4.91024	14.5946	15.7827	6.3252	2.45462	5.33349	2.06304	3.19811	3.85011	1.30781	11.0265	11.744	3.55822	3.40112	10.0498	3.46869	9.73648	9.06696	4.83422	5.6769	6.94918	3.98242
XXbac-BPGBPG55C20.2	-1.20632	0.427608	-2.30447	0.00527185	-1.91034	0.0335825	TRUE	FALSE	1.42548	1.71958	3.28497	2.09305	1.97929	3.09563	0.297947	1.9357	4.86556	1.61307	0.833443	4.43298	0.99948	0.888563	1.83309	1.92535	2.34282	4.4688	2.64533	3.35	3.37741	0.682051	0.80481	1.41014	1.14754	1.622	2.79619
ADIRF	-1.37376	0.428593	-2.16409	0.00949634	-1.57531	0.0560334	TRUE	FALSE	55.8647	76.7448	120.896	54.9342	157.593	104.388	100.188	114.937	69.2092	31.9064	14.4996	55.1394	55.1659	45.8023	128.474	18.3775	88.1436	138.731	56.304	73.1609	137.094	78.1087	80.6203	90.6382	51.9331	39.2013	243.497
ELOVL1	-1.15384	0.429033	2.05536	0.140779	2.37155	0.028446	FALSE	TRUE	98.245	113.359	47.7993	80.5788	52.8734	39.815	29.6061	42.8812	38.8022	144.257	148.002	56.0959	31.3807	43.7318	62.4431	172.4	189.538	39.6139	30.9872	61.7088	28.2052	239.499	205.205	39.5521	57.2513	162.93	77.8672
SOX6	-1.19508	0.429417	-2.35671	0.00222019	-1.97201	0.0152938	TRUE	FALSE	4.13097	4.93685	9.73553	1.83143	4.44787	13.0227	1.25106	3.87131	14.5965	2.80527	2.6668	14.3613	3.79774	2.61613	8.82711	5.60083	3.12189	4.98147	6.42424	8.63932	10.8623	4.57325	5.21844	4.28489	6.76395	8.91305	6.94797
EEF1A2	1.04601	0.430543	-2.13273	0.000971359	-2.23085	0.00707647	TRUE	TRUE	4.25512	4.06794	9.07499	14.6508	4.65172	8.326	5.59962	4.46687	8.87957	3.50657	2.83347	7.06169	1.99886	2.56677	8.17326	0.875214	2.82458	6.40472	3.02323	8.11039	12.1401	2.87676	4.37046	6.70195	1.50989	2.7193	14.9126
UBQLNL	-1.13544	0.431101	-2.00647	0.0391765	-1.76714	0.181124	TRUE	FALSE	2.60993	2.9634	5.23674	7.32543	4.13282	5.97767	4.64652	6.40248	13.3801	2.24424	1.50012	8.33119	0.799604	1.77703	3.59629	0.525168	2.37861	3.79543	2.0785	4.05524	3.0123	1.99163	1.04377	1.42836	1.26832	2.41717	2.37254
PLIN2	-1.27278	0.432432	2.2501	0.00869523	2.86387	0.00122106	TRUE	TRUE	216.31	275.314	96.1335	243.83	241.365	64.579	330.56	173.161	74.3199	241.942	493.659	69.1881	103.334	74.2358	38.2505	281.96	343.538	53.8465	63.4857	134.702	178.537	331.177	383.889	143.595	134.188	357.962	146.752
LHX2	-1.14867	0.435193	1.94836	0.191523	2.23801	0.0426569	FALSE	TRUE	48.1021	55.2533	24.6886	6.80219	25.8342	16.4384	71.1856	86.3578	35.8829	10.5896	15.0003	31.7376	46.7711	69.0534	23.2119	28.3538	28.8395	44.5953	52.149	45.6645	12.1402	91.2418	95.3653	19.776	77.724	75.9112	13.7264
ACAD8	-1.1028	0.4395	1.96393	0.0430907	2.16582	0.00735148	FALSE	TRUE	81.7749	90.1812	41.6384	66.1898	67.828	30.3149	27.4615	39.6056	28.7063	153.16	138.336	53.5571	57.1647	60.8106	70.2893	193.751	161.739	59.5395	38.356	59.9457	14.057	80.2507	92.9514	21.3141	37.8656	100.233	55.3287
STMN2	-1.31279	0.439604	2.27056	0.0458148	2.98077	0.00788693	TRUE	TRUE	29.7006	38.9906	13.0807	36.6268	36.4543	8.326	38.4224	33.6498	6.44683	4.90915	6.33351	4.36401	34.5786	55.7265	17.6541	10.8515	19.1768	18.5023	51.0153	90.8001	13.6006	42.1173	34.963	18.128	19.0838	34.821	17.624
FAM182B	1.23221	0.44022	-2.46967	0.00186917	-3.04314	0.00025117	TRUE	TRUE	6.90839	5.60653	17.0615	10.4092	4.64278	19.2821	11.794	5.65088	28.0518	3.82851	3.85677	19.3154	2.39861	2.39798	6.50451	4.02562	4.75711	16.5432	12.0723	15.6465	15.4321	3.52263	2.40744	8.77561	7.21628	5.49278	22.5872
ACYP1	-1.39794	0.440367	-2.91249	0.0365651	-2.08342	0.1667	TRUE	FALSE	1.41094	1.97241	4.10937	0.784957	2.50197	2.98888	2.02546	3.42463	5.83865	2.24424	0.833443	3.64991	0.799604	0.987281	1.96166	0.175123	0.44607	0.237308	0.944826	1.23427	5.75066	2.13915	3.7834	6.26248	2.1742	2.56824	6.1854
ZC2HC1B	-1.20446	0.44641	1.96319	0.0178401	2.36458	0.00282867	FALSE	TRUE	8.14487	9.81016	4.14879	5.4941	10.1373	2.0282	3.39556	4.16909	2.43283	12.4831	16.1669	10.7908	5.59663	4.39306	5.88477	13.3018	11.0007	2.13497	8.69158	7.22884	1.36928	13.0557	13.8287	3.29609	3.14046	11.5567	5.25337
TMEM86A	1.59034	0.44652	2.77618	0.0206203	1.74565	0.102048	TRUE	FALSE	9.73777	6.12307	3.50762	26.9469	5.09649	5.44396	8.28025	2.82906	2.43283	11.361	11.0002	3.64991	1.39923	3.30716	2.61551	4.90074	9.51413	0.474517	3.40112	2.82107	5.02043	10.6216	5.8055	2.74676	10.9913	8.61092	5.67702
FAM50A	-1.44767	0.446557	-2.20157	0.0293046	-1.52076	0.136612	TRUE	FALSE	14.1309	20.457	31.1102	23.8074	28.5585	35.4385	21.3855	62.6839	68.2881	5.89096	12.8336	19.1219	6.39613	4.68921	7.51941	4.02562	8.32487	16.8419	17.3831	13.576	24.2808	13.8671	20.6778	46.8031	20.2917	12.3121	30.5877
SGK1	1.07315	0.447127	2.41691	0.000831495	2.25217	0.00570423	TRUE	TRUE	9.46045	8.81564	3.91429	7.84867	10.2856	4.69676	11.0204	23.3762	1.82465	13.3948	11.3336	14.4407	10.7934	7.70011	0.653953	9.62635	2.22995	1.89777	9.82526	5.28942	1.36928	6.04846	5.02275	3.29609	7.1263	5.28745	3.13511
TST	-1.20165	0.447194	2.07979	0.0169136	2.49918	0.00267714	TRUE	TRUE	60.4252	72.6099	29.0535	48.9228	66.6611	17.7193	32.2867	23.0784	13.6234	74.9683	96.6679	24.676	48.7698	53.7521	28.4427	145.794	140.035	29.8883	25.1298	34.2044	15.4262	77.8174	97.5178	42.4085	29.7127	68.9622	60.2432
OTX1	-1.19924	0.448716	2.26912	0.0178505	2.72122	0.00285843	TRUE	TRUE	8.00521	9.60016	3.52789	8.37191	7.56131	2.45517	4.76566	22.334	3.89247	1.96372	3.50014	1.42829	4.997	4.88665	2.28858	6.82599	9.21681	4.26985	5.8574	6.87621	3.55997	13.8671	9.13219	3.29609	17.3929	13.294	7.0327
ACE	1.49019	0.448915	-1.81772	0.159948	-2.70874	0.0358551	FALSE	TRUE	3.43648	2.30607	6.24654	8.89514	2.70583	2.45517	3.69341	1.34013	2.06792	0.561134	0.833443	3.09451	3.99762	1.57959	8.17326	2.2754	3.71652	3.32102	2.64533	2.29214	13.3268	2.28334	3.26159	2.19743	3.14046	2.71931	15.3362
GIMAP4	-1.47024	0.449485	-3.89746	0.0108376	-2.65091	0.0583585	TRUE	FALSE	2.38177	3.50177	9.28284	0.523338	3.07648	2.0282	1.3702	0.59567	1.3381	3.57669	3.66681	1.98369	3.19811	2.46805	13.0772	1.75033	8.32487	12.3349	4.91268	5.64204	18.6209	2.21291	2.80496	12.0854	1.50989	1.43524	12.7943
FADS6	-1.68797	0.450116	2.845	0.0309254	4.80228	0.00528348	TRUE	TRUE	3.54772	5.98844	1.247	7.06381	6.28258	1.38775	0.476656	9.38033	0.121736	5.47019	14.1669	1.98369	1.39923	1.18472	0.327026	5.07576	5.5004	0.0001	0.566936	2.11583	0.0913786	7.30239	5.3489	4.28489	1.02676	3.92784	1.77943
SEC14L4	-1.16398	0.450654	3.21554	0.0438376	3.74282	0.00784786	TRUE	TRUE	13.3261	15.5113	4.14427	16.4821	9.98901	3.62934	13.9393	8.93365	1.94628	18.0935	23.5004	3.8086	5.39675	2.07318	0.327026	22.9281	25.1231	0.474517	0.189045	7.40515	0.182657	26.9227	31.5058	9.22887	2.65733	15.56	13.5569
ALDH1A2	-1.29163	0.452244	-2.94073	0.0390558	-2.27675	0.169757	TRUE	FALSE	1.27473	1.64649	3.74864	0.261719	1.46416	1.49449	0.953211	1.78681	0.851555	1.12217	1.00011	2.5391	3.59787	1.33279	0.980879	0.350145	4.90577	7.82797	1.51166	1.5869	4.65531	1.91787	0.717622	0.87903	0.483232	0.377767	10.7608
ELOVL5	-1.53729	0.453479	2.96873	0.0787133	4.5638	0.0155874	FALSE	TRUE	333.599	512.84	112.371	130.025	180.487	45.7925	522.424	153.955	67.9949	481.109	1909.19	128.22	160.301	66.8816	48.3852	672.437	630.75	56.9301	34.3881	112.134	59.3312	617.08	629.658	252.36	51.031	419.664	239.956
TAGLN	-1.28245	0.4542	-5.95118	0.0146171	-4.64047	0.0743242	TRUE	FALSE	33.3425	42.7602	198.427	4.44762	22.6096	44.9386	88.7586	90.9734	13.9883	13.6753	12.3336	22.375	41.1745	37.0688	73.5585	28.5288	87.5588	264.25	13.6042	43.3725	564.467	55.8368	26.9398	38.0138	20.7144	21.225	565.827
NKAPP1	1.42141	0.458773	-1.94686	0.00473517	-2.7673	0.000718709	FALSE	TRUE	14.1669	9.96681	27.5811	9.15676	9.02647	16.8654	27.6403	10.4226	36.9776	5.54031	8.16686	30.3888	8.39489	8.34178	13.4041	11.0265	9.06815	18.7396	36.8444	21.1574	22.911	8.26127	5.54459	58.0615	6.47106	8.00665	23.3009
SGPP2	-1.47942	0.459124	2.07092	0.0839225	3.06375	0.0171743	FALSE	TRUE	34.2748	50.7067	16.5505	13.081	18.6622	13.1294	33.0016	8.18919	7.78483	31.418	78.001	8.80725	26.1838	11.7476	6.2117	44.1058	75.2204	9.72564	8.50264	31.5597	28.1139	95.0773	88.3857	27.0272	22.8281	93.8882	31.6044
SNRNP48	1.57933	0.459239	-1.29157	0.124995	-2.03982	0.0275867	FALSE	TRUE	130.012	82.3211	167.92	178.163	114.998	133.214	400.902	127.452	181.238	56.4542	102.335	100.291	59.3632	59.6752	79.7701	44.9809	45.6377	117.655	183.844	84.9818	149.7	52.7388	77.0358	421.777	63.6528	46.4532	159.716
GOLGA7B	-1.21908	0.460527	-2.01067	0.0243115	-1.64933	0.112047	TRUE	FALSE	18.3478	22.3675	36.8915	36.6268	30.338	54.6521	27.3425	42.4345	82.6133	12.624	24.0004	52.7637	9.39427	10.2668	13.4058	7.35105	7.8789	23.4837	23.8072	24.1547	22.7285	12.9082	16.8292	22.5227	16.7286	23.0378	22.962
FOXD3	1.66316	0.460536	-1.60417	0.154397	-2.668	0.0358151	FALSE	TRUE	1.66563	1.00148	2.67196	0.523338	0.463409	0.427069	0.774503	1.19124	1.58137	0.841652	0.333437	1.2696	6.99576	2.02382	5.23092	1.40028	1.93264	2.60939	0.944827	0.529032	5.65938	1.18027	0.782851	1.20863	0.664407	0.755435	3.3893
HSF4	-1.18977	0.460729	-2.20758	0.0249767	-1.85548	0.114533	TRUE	FALSE	21.1977	25.2203	46.7957	53.8935	48.2207	73.9725	15.7264	38.5632	46.5868	26.9998	24.167	135.679	5.99638	15.0052	27.4619	11.7266	8.77084	29.8883	26.6414	31.0307	21.6331	11.5067	12.5893	17.0294	17.0909	23.4155	22.1147
LAMA5	-1.16496	0.461505	-2.06404	0.00376743	-1.77177	0.0218557	TRUE	FALSE	124.363	144.878	256.691	102.031	215.901	396.441	261.867	217.339	412.723	64.5892	95.3345	436.803	74.5538	134.997	175.233	91.712	66.3011	169.604	157.58	146.867	158.549	120.156	91.7124	156.997	122.414	190.571	147.178
SHISA2	-1.00953	0.461584	4.11672	0.0812232	4.15597	0.0166852	FALSE	TRUE	13.9415	14.0744	3.38654	1.04658	4.18842	2.45517	52.5403	46.0079	4.25738	1.12217	3.33347	3.88794	13.1919	11.7476	2.28858	5.60083	7.13562	1.18614	5.29057	6.34728	5.93321	19.0303	18.1991	3.18622	13.709	15.6355	3.89768
MPHOSPH9	-1.22499	0.463232	-2.26374	0.0059802	-1.84798	0.0329238	TRUE	FALSE	7.61128	9.32371	17.23	4.97086	9.91488	18.68	7.50585	18.6117	31.3823	6.452	9.66688	13.1712	3.39799	5.82447	11.7694	5.95087	4.60846	8.77681	11.9037	5.11311	5.93321	7.96623	11.9371	32.96	12.7427	8.91305	15.1668
DIO2	1.28408	0.463472	2.5712	0.000421542	2.00237	0.00278921	TRUE	TRUE	141.788	110.42	55.1446	51.8006	77.7271	36.3992	207.242	79.2109	39.6536	60.5918	64.5008	48.9552	141.113	109.479	48.3852	100.288	105.695	53.372	296.077	140.52	87.6276	151.578	153.876	72.6217	125.615	152.351	54.1426
WNK4	1.19789	0.466014	2.18035	0.00478484	1.82016	0.0266801	TRUE	FALSE	5.14296	4.29335	2.35878	2.61629	1.8904	3.20237	9.9482	3.42463	1.3381	2.10398	3.1668	8.56922	5.39675	14.0181	0.653953	3.15051	3.12189	3.08381	7.55791	2.11583	0.456493	5.90094	3.58771	0.549432	4.46907	3.02144	1.01686
GAL	-1.23551	0.466568	5.25199	0.113003	6.48889	0.0251165	FALSE	TRUE	106.297	131.331	20.2393	98.8921	16.0862	10.9946	82.1464	75.9353	17.1508	133.667	131.002	26.6596	16.5898	6.12062	0.653953	296.314	402.414	7.11635	0.377991	30.5018	0.821608	216.045	267.505	48.7807	6.34121	121.08	49.7367
XRRA1	1.29978	0.469591	-1.60637	0.111184	-2.08793	0.0249113	FALSE	TRUE	5.8348	4.48907	9.37283	7.06381	3.3174	7.04509	9.41207	5.06245	5.59538	2.73514	6.50017	15.8688	8.19501	8.63794	10.4617	9.10128	4.4598	20.8744	4.91268	3.52631	4.65531	3.68812	2.21789	4.21185	1.57028	2.19057	6.27013
ERG	-1.24665	0.470008	-2.7647	0.0242432	-2.2177	0.108532	TRUE	FALSE	1.70607	2.12688	4.71678	0.523338	2.0016	0.747296	2.20417	1.48903	1.3381	2.10398	1.66679	2.93582	1.59911	2.12254	10.7887	1.40028	3.71652	4.03264	2.64533	2.46845	4.10764	2.50796	2.87019	3.95529	0.664407	0.679901	9.82879
SNORA36A	1.34194	0.470897	-1.70553	0.056121	-2.28872	0.0112744	FALSE	TRUE	3.16741	2.36032	5.40211	6.21791	2.72495	4.95599	4.81192	3.42463	6.32286	1.88044	3.00013	4.60204	3.46462	1.87574	1.96166	1.22526	1.25195	2.13497	2.81066	2.82107	5.65938	1.32779	1.69606	11.0901	3.60071	2.08806	6.48986
PECR	-1.33673	0.471436	2.21673	0.0691462	2.96316	0.0143662	FALSE	TRUE	35.1085	46.9305	15.838	19.3599	22.2572	8.326	48.4301	23.9718	5.71702	51.7557	104.667	13.8853	26.7835	10.02	6.86555	56.5324	50.9893	7.11635	5.85741	13.576	9.21925	65.2041	92.1044	38.1236	6.94512	57.8584	37.4509
C10orf10	-1.04896	0.474435	-2.14191	0.0245191	-2.04193	0.10808	TRUE	FALSE	12.6537	13.2732	27.103	2.09305	14.9743	9.17993	47.5961	13.1026	15.2047	8.90652	10.0002	10.2354	11.7928	12.8828	28.7696	11.9016	34.0425	43.6464	5.10162	10.9314	79.6864	8.03999	4.43569	11.2065	5.79769	5.81618	18.8949
ABCA8	1.51216	0.476636	-1.82034	0.0181229	-2.75265	0.00326477	FALSE	TRUE	21.8619	14.4574	39.7961	6.27895	18.6437	15.798	65.2882	16.9738	34.0583	12.3429	11.6669	25.1521	15.1907	12.1424	17.6541	12.7768	22.0013	54.0836	39.3007	9.69718	40.254	14.8997	19.6993	84.5972	8.81727	4.83424	46.7711
NPM3	1.11591	0.478592	2.17209	0.000389014	1.94647	0.00242486	TRUE	FALSE	52.27	46.8406	24.0644	60.1725	56.7277	8.64622	40.3882	18.4096	10.2176	40.7452	34.0005	31.0235	46.1714	67.3752	31.385	62.6582	69.5714	51.2371	68.9651	48.3092	24.554	52.075	41.3556	9.7782	46.9847	38.9754	25.6733
LINC01139	-1.1437	0.48026	7.97962	1.63651e-10	9.1263	4.04414e-11	TRUE	TRUE	15.4086	17.6228	1.931	10.2032	11.8608	1.92146	11.497	22.6318	1.3381	20.2675	17.8336	0.952225	22.1863	20.4841	3.26936	18.9026	18.4335	4.50706	10.2031	21.1574	1.36928	17.6289	17.0249	0.988897	12.3804	11.5567	1.10159
FLJ27365	1.02098	0.482666	-2.01497	0.0113051	-2.05724	0.0540635	TRUE	FALSE	7.3105	7.16028	14.7305	5.23248	8.74738	18.3598	27.2829	15.9316	35.518	1.89359	4.66682	15.3134	1.79898	5.28152	6.86555	1.05024	1.33801	8.06518	9.25842	7.40515	14.2396	5.38461	4.69661	12.1953	6.58278	9.21519	7.28689
FAM228B	-1.33436	0.482822	-2.12143	0.0181742	-1.58985	0.0815977	TRUE	FALSE	3.62751	4.84041	7.69553	2.35467	3.28034	4.69676	5.95704	6.25359	7.17665	1.12217	1.50012	4.12597	3.19811	7.99625	9.48096	5.25078	7.13562	13.7582	4.91268	4.76049	5.29426	3.68812	6.58825	12.9643	2.53654	1.20864	4.06714
ACSM3	-1.63388	0.48284	2.90707	0.0846166	4.74979	0.0189616	FALSE	TRUE	35.793	58.4814	12.3124	18.8367	21.2009	5.97767	20.909	12.3582	11.9205	95.0954	226.003	21.7403	12.1925	7.20652	2.61551	91.362	94.2484	7.82797	4.72373	11.6366	6.3896	32.2333	36.6589	15.9307	10.9914	58.5386	26.097
KRT85	-1.02177	0.483117	2.07399	0.00718742	2.11914	0.0361478	TRUE	TRUE	65.0244	66.4398	31.3523	122.728	6.09725	175.48	57.5442	165.866	1.42037	13.6753	11.8336	0.872881	95.5408	116.089	42.8274	20.8278	56.0437	10.9117	49.4861	1.93952	0.456493	89.2503	115.715	4.61448	71.1426	57.9341	14.2348
EPHB2	1.24047	0.485218	2.27066	0.0279926	1.83048	0.116924	TRUE	FALSE	4.91801	3.96463	2.16589	5.23248	6.02314	4.59002	5.30178	1.78681	1.58137	2.94553	6.50017	1.11091	3.79774	3.06036	1.30781	1.05024	0.743383	3.79546	3.21217	3.52631	2.64718	6.93358	2.6745	0.769164	10.8706	7.40238	1.52524
CNNM1	-1.06954	0.488353	-2.65454	0.00829984	-2.48195	0.0403556	TRUE	TRUE	1.97442	2.11172	5.24117	1.30819	3.09501	4.48327	4.2891	4.46688	8.63629	2.31437	2.83347	6.7523	0.199976	0.839204	9.15404	0.350145	1.33801	0.948933	2.45639	1.76321	5.29426	1.91787	1.50037	3.18622	2.95929	1.05757	3.47403
FAM3D	-1.34166	0.488873	-3.207	0.00824432	-2.39032	0.0400434	TRUE	TRUE	2.03686	2.73278	6.53222	3.66277	2.48344	5.5507	0.476656	2.97795	1.58137	5.32993	1.50012	9.52135	2.79836	4.14626	14.7118	0.525168	2.22995	4.98147	0.189045	7.40515	6.11577	2.95052	1.04377	3.18622	0.362449	0.0756335	6.60905
ZNF251	1.18417	0.491818	-1.94313	0.0591326	-2.301	0.012965	FALSE	TRUE	1.67848	1.41744	3.26152	1.83143	1.24234	2.98888	2.26374	0.893455	8.96662	1.60959	1.16678	4.60204	1.39923	1.82639	1.96166	1.92535	1.48667	2.60939	1.88955	1.41059	1.55184	1.18027	1.50037	1.20863	1.32871	1.8129	2.20308
ACAT2	-1.4096	0.497016	2.3597	0.0656545	3.32624	0.0149006	FALSE	TRUE	111.999	157.875	47.4634	48.138	52.8175	35.3319	71.2988	39.159	13.6234	199.802	417.002	56.6518	88.9734	41.5607	20.2695	217.906	217.188	22.5349	16.0604	50.7776	18.6376	217.52	299.924	117.558	36.2965	144.568	95.1
CCBL1	1.04085	0.499563	-1.95882	0.0685447	-2.03884	0.0158038	FALSE	TRUE	4.76383	4.57686	9.33148	3.66277	5.65247	8.11252	10.3056	8.33809	23.2327	2.94553	3.00013	9.75939	2.19873	1.67831	3.92322	2.97549	0.44607	4.98147	5.10162	5.99466	8.12391	4.94206	3.19633	8.13021	5.97887	8.30879	8.38839
PGD	-1.24779	0.499705	1.77947	0.0114984	2.22041	0.00219066	FALSE	TRUE	150.828	188.201	84.7597	146.507	177.542	95.2148	151.189	98.2697	43.0595	205.691	407.991	94.5786	138.315	93.2895	66.3661	150.521	200.688	63.5718	62.73	85.5111	81.969	215.305	247.289	119.865	136.364	195.029	113.453
CNTNAP3	-1.45675	0.501082	-2.56482	0.0118928	-1.76065	0.053168	TRUE	FALSE	39.1376	57.0137	100.381	27.2283	20.1335	92.3578	52.2355	192.273	146.385	31.5337	56.3681	188.76	7.30298	12.415	45.5918	14.0997	18.743	33.3457	49.9777	56.6311	164.874	60.2147	54.1443	86.1767	70.508	45.4015	45.5563
FGD6	1.37507	0.501658	-1.79947	0.0539369	-2.4744	0.0121141	FALSE	TRUE	5.42847	3.94777	9.76838	4.186	2.66876	7.15183	19.0027	8.78476	15.4479	2.24424	5.16682	7.69645	1.79898	1.82639	3.26936	2.97549	0.89204	3.55822	3.02322	2.99738	11.9576	3.61436	2.6745	21.8635	6.58277	6.57151	7.20216
CYP2R1	-1.03734	0.503107	2.28957	0.114014	2.37505	0.0289425	FALSE	TRUE	8.8918	9.22375	3.8836	6.27896	6.00457	3.62934	0.595794	2.82906	0.973192	18.4441	18.1669	6.03022	10.3937	7.25587	5.88477	19.6026	13.5278	2.8466	3.77901	5.28942	1.278	6.78606	8.47989	2.96649	5.25416	12.2365	7.4602
PCDHB19P	1.56854	0.503541	-1.56478	0.0774218	-2.45442	0.0184493	FALSE	TRUE	9.61979	6.13294	15.0528	13.8659	5.46715	18.7867	31.8979	13.1026	36.856	3.92734	9.50021	16.821	2.99824	3.50459	6.2117	2.97549	3.4192	4.74427	9.63631	5.99466	17.1605	7.67119	4.82706	10.4374	3.98594	3.24804	9.40514
WNT2B	-1.17446	0.504057	-2.29689	0.00390797	-1.9557	0.019323	TRUE	FALSE	7.73364	9.08286	17.7634	9.68	9.56567	10.3582	9.70992	7.44473	35.8867	6.10135	4.16681	16.6653	2.99824	4.34539	14.0579	2.63716	5.95079	17.5627	5.70497	13.9324	25.4668	10.7083	8.74839	6.4907	14.3292	18.5087	15.6185
ITGA11	-1.39297	0.50596	-2.20051	0.027238	-1.57972	0.107375	TRUE	FALSE	1.35959	1.89387	2.99179	0.261719	1.3159	3.73608	1.13192	3.12684	1.09483	0.771522	0.166769	3.57057	3.39799	1.33279	2.28858	0.525168	4.60846	5.21868	0.944827	1.41059	3.37741	2.21291	2.28312	1.42836	1.63067	0.906502	3.21984
A2M	-1.13806	0.507404	-2.46016	0.0173514	-2.16171	0.0725216	TRUE	FALSE	34.6102	39.3885	85.1466	3.40115	28.8365	51.5566	71.2451	58.366	27.3683	22.5817	15.1669	24.5967	63.1609	46.4963	107.886	35.0046	93.0591	97.7299	18.1388	29.9729	230.57	41.306	26.7441	46.1439	22.043	16.4664	95.3215
SP140L	-1.17885	0.508173	-2.12253	0.00793247	-1.80052	0.0362129	TRUE	FALSE	14.9483	17.6217	31.7282	15.174	26.9292	10.2474	10.1865	11.4648	55.7184	18.5142	8.33353	24.9199	18.1888	28.3449	51.1068	11.3766	21.7257	34.3953	26.6414	18.0225	16.9779	14.4098	17.0393	23.7714	5.09506	9.11376	36.6884
HMGCR	-1.24064	0.50989	2.23348	0.033349	2.77095	0.00728522	TRUE	TRUE	173.424	215.157	77.6472	167.175	133.155	90.1973	54.8636	118.072	44.1542	249.661	464.672	78.3124	118.327	73.4464	42.1736	326.768	248.554	40.7999	44.4023	66.6455	21.3593	329.931	395.094	164.8	96.2643	221.616	139.381
HMGCS1	-1.36468	0.511007	1.76039	0.163958	2.40237	0.0458652	FALSE	TRUE	606.824	828.121	344.708	275.745	238.443	128.624	1163.93	364.491	258.355	592.77	1578.77	151.229	419.139	169.601	106.251	977.162	1062.16	95.595	95.7954	235.73	176.806	1204.8	1918.73	1145.8	125.252	1057.04	695.006
UNC13D	-1.31942	0.516319	-2.26348	0.0161375	-1.71551	0.066187	TRUE	FALSE	1.67691	2.21255	3.79566	2.09305	1.11204	2.24169	1.31063	6.40248	9.36611	0.491005	0.833443	4.91941	1.59911	1.52104	1.63473	1.5753	1.33801	2.13497	3.40112	2.11583	3.19485	1.25403	2.41358	2.63689	1.69106	1.96397	4.23661
RP11-216L13.18	1.43828	0.516648	-1.60815	0.0662638	-2.31297	0.0161781	FALSE	TRUE	27.6501	19.2244	44.4654	91.3993	43.5514	82.2848	35.5631	20.8451	37.5404	12.1004	13.8336	90.2208	8.19501	12.4017	50.0198	14.6366	5.28366	34.6325	38.8941	37.9069	16.6128	9.28493	8.50733	21.5827	11.1274	11.4657	22.8297
RARRES1	-1.45678	0.517645	1.81041	0.0292313	2.63737	0.00648462	FALSE	TRUE	11.7752	17.154	6.50419	20.4064	5.81927	2.7754	19.0623	25.3118	3.16265	7.36368	23.8337	3.25319	4.59725	2.91228	0.327026	11.5516	10.4061	1.66056	6.99108	15.8681	4.38147	20.7268	40.7684	27.5765	3.50281	12.3121	8.89676
LYG1	1.40127	0.518136	-1.43473	0.165713	-2.01044	0.0475613	FALSE	TRUE	2.70257	1.92866	3.87745	8.37191	4.87413	4.26979	2.26374	1.34013	3.28428	1.1923	0.333437	4.28466	1.99886	2.1719	5.55785	0.175123	0.297413	3.55822	1.88955	2.29214	0.912886	2.28667	1.17423	2.96649	3.44242	2.94591	6.1854
GRK5	1.12073	0.519481	-2.28137	0.00151781	-2.55681	0.000284581	TRUE	TRUE	8.08636	7.21523	18.448	10.7265	10.7674	10.5676	10.1865	4.76466	11.3123	8.97665	4.33348	18.4872	9.59414	6.46614	33.3466	4.37567	9.81144	18.0279	8.69158	12.5182	26.0145	8.33503	3.84863	8.89927	3.80477	5.21191	20.9284
KRT27	1.20716	0.520154	2.50184	0.00396699	2.07249	0.0184939	TRUE	TRUE	60.6351	50.2294	24.2363	239.381	12.9015	107.063	24.1853	28.2897	0.365009	28.6129	15.8336	0.63485	32.1801	142.006	58.5199	33.4294	61.5439	6.87914	49.3148	0.881653	0.0913786	31.7171	107.824	0.34073	46.26	32.555	19.9964
PTPRB	-1.19033	0.521742	-2.64426	0.000196523	-2.22145	0.00104763	TRUE	TRUE	2.54884	3.03397	6.7398	1.83143	1.98307	5.44396	3.03814	5.65802	4.25738	3.57669	3.1668	4.36401	2.19873	2.81356	8.50019	1.5753	2.22995	4.26985	3.40112	4.23156	5.75065	2.65548	1.69606	7.69074	2.1138	2.49271	13.6416
SEMA3E	-1.07908	0.522277	-2.42427	0.00664204	-2.24661	0.0294035	TRUE	TRUE	3.74694	4.04324	9.0836	0.523338	1.07498	5.23047	8.75681	7.59362	4.62229	4.48838	5.50016	4.44335	4.997	2.31998	5.55785	1.75033	5.20308	7.11635	3.77901	4.05524	19.8988	4.35197	3.65294	13.5137	1.32871	2.94591	12.286
MAATS1	1.20693	0.527348	-1.94879	0.0386681	-2.35206	0.00916807	FALSE	TRUE	4.37278	3.62305	8.52162	8.37191	4.76293	8.53948	7.86326	9.38033	22.1379	1.82346	2.33346	10.3148	2.79836	1.87575	5.88478	2.62544	1.0407	8.30239	7.18002	4.76049	5.29426	2.50796	2.41358	4.39475	1.81185	2.41717	3.30458
SUSD4	-1.06922	0.528169	2.24967	0.0199191	2.40539	0.00443457	TRUE	TRUE	8.82775	9.43882	3.92403	6.27895	11.6199	8.11251	1.07235	5.50912	3.89247	10.3792	4.33348	4.99876	6.79588	9.92127	2.94244	10.5015	12.0413	5.6931	8.50264	9.69718	1.09544	15.8586	11.2848	1.09876	11.2329	11.1035	3.55876
ALDH1A1	-1.03704	0.52922	2.54641	0.00537745	2.64075	0.00110018	TRUE	TRUE	79.0386	81.9666	31.0392	85.2879	82.1356	22.6295	8.51853	112.563	17.5158	83.8747	86.6677	29.516	89.3446	61.156	31.385	111.84	95.8836	42.6976	84.4586	48.3092	8.03262	73.6868	93.4084	47.9018	95.298	75.6091	48.6352
XXYLT1	1.24248	0.530523	2.53987	0.0349168	2.0442	0.123485	TRUE	FALSE	3.59203	2.89103	1.41425	1.30819	1.96453	1.06752	0.655364	0.446778	0.243373	4.0676	3.00013	1.74566	8.79464	6.26871	0.653953	4.37567	4.75711	2.13497	2.64533	0.881653	2.5559	3.02428	1.95698	0.87903	3.86516	3.85231	2.03362
TPM2	-1.45033	0.531289	-3.69129	0.000143983	-2.54514	0.000742903	TRUE	TRUE	51.0892	74.0963	188.586	42.3823	59.3385	205.694	76.4877	284.387	132.828	24.9661	24.0004	109.892	122.524	47.8293	122.271	25.0283	51.8813	263.066	49.3149	61.3562	160.013	44.6991	40.6381	88.5528	23.3113	23.3399	426.369
SCNN1B	1.1726	0.533549	-2.18581	0.00292913	-2.56309	0.000593664	TRUE	TRUE	11.521	9.82518	25.1828	9.15676	10.9157	29.9946	9.94818	11.4648	10.7041	15.5688	4.16681	16.9797	18.5885	8.48986	36.2889	6.30092	10.2574	26.8046	4.34584	19.218	28.9355	15.6373	6.30884	12.5249	12.6219	7.78005	39.2303
HIST3H2A	-1.18928	0.533897	2.19431	0.0169211	2.60964	0.00379786	TRUE	TRUE	2.8149	3.34771	1.28282	3.66277	3.93148	0.643216	2.64126	5.80691	0.853562	1.05446	2.00143	0.556379	1.40273	0.941801	0.653953	1.40281	3.57252	0.948933	2.46153	2.29552	1.92195	5.70736	4.97603	2.64218	4.18631	3.25596	2.0424
PTPRU	-1.23025	0.533943	-2.21243	0.0039295	-1.79836	0.0174599	TRUE	FALSE	7.31992	9.00531	16.1948	7.06381	7.22773	22.2024	10.3652	17.7183	28.5847	6.24161	2.6668	15.0754	7.79526	7.6014	13.4041	3.8506	5.64905	11.8605	3.59006	12.6945	16.7041	11.8018	10.1759	5.71315	7.851	8.30878	16.0141
THEM4	1.38288	0.534596	2.30678	0.0202747	1.6681	0.0763624	TRUE	FALSE	14.4392	10.4414	6.25949	4.70924	4.27713	3.68029	3.87211	3.42463	1.82465	23.1744	8.45553	4.78209	26.3837	18.7652	18.308	26.2535	18.4335	7.11635	16.8162	11.8129	2.82974	7.42009	9.32788	2.08756	6.88474	9.0345	9.4472
MAMDC2	1.28936	0.538177	-1.79337	0.0404329	-2.3123	0.0100243	FALSE	TRUE	13.9865	10.8477	25.083	2.35467	3.03941	8.326	5.24221	6.84916	19.5836	8.34549	7.00018	13.3298	27.7829	11.1059	18.9618	23.6282	27.9475	31.3116	11.7147	7.75777	41.5099	22.497	17.4163	39.0026	10.3271	5.66511	28.6389
HOXD4	-1.30954	0.538463	-4.22526	0.000388929	-3.22653	0.00190887	TRUE	TRUE	1.75125	2.29333	7.39949	2.61629	1.8904	5.23047	0.595794	3.72241	13.5017	1.40269	0.333437	7.14104	0.599728	1.97446	12.7502	1.40028	1.33801	4.98147	3.96795	5.46573	1.73439	2.58172	2.41358	5.38355	0.845582	1.20864	8.47311
ANGPTL4	-1.28047	0.540342	2.22635	0.0844188	2.85078	0.0232014	FALSE	TRUE	16.5325	21.1694	7.42584	18.8367	15.7734	6.19115	39.4946	42.8812	17.8807	4.83902	17.8336	3.57057	4.59725	4.44242	0.653953	15.9272	27.0556	7.35356	3.40112	2.99738	2.28207	32.6022	34.0498	11.6459	12.5618	24.3219	9.82879
MSMO1	-1.24894	0.541373	2.26572	0.086094	2.82975	0.0238149	FALSE	TRUE	784.363	979.621	346.187	366.792	414.017	109.198	704.474	258.33	154.723	1325.17	2888.56	198.52	727.754	197.783	98.7317	1930.08	1438.86	90.851	54.2273	297.615	59.1489	1069.54	1383.2	1340.82	96.8688	958.604	717.501
SGK2	-1.24764	0.541505	2.2327	0.101259	2.7856	0.0287325	FALSE	TRUE	51.3899	64.1159	23.0169	48.138	52.243	17.1856	63.442	44.0723	36.3694	81.0701	155.501	44.1152	22.5861	9.47705	7.84633	106.239	82.5045	14.707	11.7147	18.689	4.92915	70.441	90.9957	25.599	7.48865	59.4447	33.3838
GALNT12	-1.15974	0.541893	-2.55091	0.00572191	-2.19955	0.0240038	TRUE	TRUE	2.74161	3.17955	6.99359	1.56981	3.00235	10.6743	3.39556	3.57352	7.17665	2.31437	1.66679	6.03022	3.39799	3.11172	6.53863	0.875214	2.82458	7.82797	6.61319	7.40515	8.30646	1.77372	1.43514	1.0061	1.99302	2.41717	8.38838
MOCOS	1.27353	0.543877	2.90299	0.00121996	2.27948	0.00561636	TRUE	TRUE	29.819	23.4144	10.2718	37.9348	22.7208	8.96645	25.4958	11.3159	8.27138	28.8934	38.1672	10.5528	26.7835	10.5136	3.59629	67.5589	41.4753	5.21868	18.1388	17.2785	6.20705	27.5865	26.8093	21.3142	6.16004	19.0345	18.0476
PCDH19	-1.33114	0.544286	-2.40801	0.0243037	-1.80898	0.0868764	TRUE	FALSE	3.93544	5.23862	9.47659	2.35467	2.6873	3.73608	1.66804	6.70026	4.37901	3.43643	1.66679	7.77581	6.596	8.98344	27.4619	6.30092	9.06815	8.7768	3.96795	7.57403	6.75472	4.27821	2.28312	3.62569	2.88133	2.94591	13.3027
DIXDC1	1.01677	0.544499	-2.1865	0.00154753	-2.22317	0.00702381	TRUE	TRUE	8.79148	8.64646	19.2226	1.83143	9.91492	14.8373	22.0408	11.6137	39.8969	9.8182	6.66684	12.219	8.59476	6.02191	24.5196	3.15051	8.17621	17.7907	7.18002	13.7523	17.5256	8.11375	7.43623	11.3163	9.60236	5.58958	15.6752
CTAGE6	-1.17196	0.546067	-2.55847	0.000995737	-2.18306	0.00458926	TRUE	TRUE	22.5721	26.4537	57.7501	21.2272	29.1212	39.011	19.1027	47.7537	63.8234	14.5479	18.1479	35.8574	21.3326	27.6655	57.5564	19.1728	24.1216	74.4636	26.2418	18.7296	12.6649	32.1875	18.0074	105.697	26.7645	28.0827	72.927
GBGT1	1.37964	0.548902	-1.59692	0.0671102	-2.20318	0.0183912	FALSE	TRUE	1.54727	1.1215	2.47086	0.784957	1.90894	0.640554	1.25106	1.19124	2.06792	0.911781	0.333437	2.69779	1.19936	0.592409	2.94244	0.700191	1.0407	4.03264	5.29057	0.705343	2.28207	1.69659	2.21789	2.30729	0.543624	0.982035	2.79619
AHSA2	-1.14981	0.54941	-2.15286	0.0173181	-1.87236	0.0635403	TRUE	FALSE	46.0752	52.9778	99.1932	82.4101	65.9223	177.516	30.3209	122.242	152.9	31.5583	48.334	151.708	14.1913	25.5188	42.5005	20.8278	22.2986	72.8231	88.6154	50.7776	23.1536	51.337	41.747	86.0951	49.3404	46.982	86.8496
BRI3BP	-1.05487	0.553098	3.61969	0.00865977	3.81831	0.00199605	TRUE	TRUE	146.233	154.257	40.3994	83.1949	115.401	19.107	145.588	33.5009	28.5847	135.981	169.002	41.6556	152.505	63.1797	42.8274	476.412	406.13	44.5953	36.8444	150.393	28.8441	119.049	146.896	57.6769	20.2917	149.556	59.9043
PCDHB15	-1.21228	0.554359	-2.18846	0.00255696	-1.80525	0.0108839	TRUE	FALSE	4.6091	5.58753	10.0868	4.70924	3.80378	11.4964	9.30559	16.6761	12.0421	5.40006	3.83348	13.4885	0.99948	3.71499	7.84633	2.2754	2.22995	11.2022	3.96795	6.87621	10.8031	6.7123	4.56626	7.12236	3.50281	2.99944	6.69378
CCDC81	-1.28059	0.555398	-2.13861	0.0347611	-1.67002	0.114684	TRUE	FALSE	0.894136	1.14502	1.91221	1.04658	1.66802	1.49449	0.893642	1.48903	1.70301	0.420876	1.00011	3.49122	0.399852	1.086	2.61551	0.700191	0.594726	1.66056	1.51166	2.29214	0.547772	1.03275	0.652392	0.988897	1.14754	0.377767	2.79619
TBC1D3F	1.62842	0.557419	-1.35232	0.0788606	-2.20214	0.0227445	FALSE	TRUE	113.921	69.9578	154.057	248.611	127.258	206.95	266.324	124.564	193.768	34.587	79.3676	200.103	26.33	36.7471	83.7323	25.8458	22.5862	77.0689	204.805	78.1106	87.6057	43.5598	37.2588	270.792	61.3018	53.7702	112.433
MS4A6A	-1.06456	0.557853	-2.2194	0.0314151	-2.08481	0.104367	TRUE	FALSE	7.47391	7.95643	16.5876	2.61629	4.26256	4.69676	18.5858	6.55137	8.63629	8.27535	15.1669	5.71285	4.19749	5.67639	5.55785	4.02562	8.77084	18.2651	10.2031	7.58145	30.9435	4.27821	8.08852	25.9286	7.60942	7.55344	32.9601
CTC-471J1.10	-1.11693	0.558926	-2.07957	0.00903756	-1.86187	0.0344133	TRUE	FALSE	1.74194	1.94563	3.6225	0.261719	0.952894	2.8002	0.777891	0.59567	2.79774	2.25714	2.33346	2.93582	1.39923	1.0404	2.94244	0.525168	0.784287	3.08381	1.70061	2.99738	3.58531	3.44508	3.68843	4.73403	3.56871	3.17251	6.10067
NR5A2	-1.37658	0.560567	-3.56689	0.00347455	-2.59113	0.0141888	TRUE	TRUE	2.41337	3.32219	8.60822	1.04658	1.2047	1.60123	5.0635	4.31798	6.69011	1.96372	0.500106	2.61844	1.79898	3.89947	10.1348	3.67558	5.79771	10.6745	2.83428	6.17097	15.6087	2.13915	1.89175	13.4038	0.78519	2.79484	8.1342
MMRN2	-1.15615	0.562539	-2.00028	0.0242053	-1.73012	0.0820408	TRUE	FALSE	9.07665	10.494	18.1559	1.83143	8.19142	13.5564	17.3944	7.59362	7.05502	8.69614	4.50015	11.5843	9.9939	9.13152	20.5965	9.97639	26.015	13.521	7.18002	10.9314	49.2906	9.14641	8.67559	11.4262	8.39453	8.91305	18.217
ATF7IP2	-1.19803	0.564689	-2.26012	0.0478538	-1.88653	0.146977	TRUE	FALSE	2.71059	3.24737	6.12626	1.56981	4.65173	4.37653	0.595794	6.70027	9.3661	2.94553	2.50013	6.03022	2.59849	2.81357	2.61551	2.97549	1.18935	6.64193	1.88955	1.5869	0.730329	3.61436	4.04431	10.4374	5.49573	2.4927	8.81203
F10	-1.27825	0.56477	-4.02765	0.000194473	-3.15091	0.000875742	TRUE	TRUE	2.85291	3.64673	11.4905	2.09305	2.31665	5.44396	3.81254	2.82906	9.85266	1.40269	1.00011	4.04663	2.39861	3.85011	9.80789	3.32553	6.54099	11.8605	1.88955	3.35	27.6575	4.94205	6.71871	4.61449	2.95929	2.56824	18.6407
APOE	-1.10657	0.56493	2.06799	0.000149521	2.28837	3.28077e-05	TRUE	TRUE	2734.3	3025.68	1322.2	3775.49	3458.15	1323.43	3511.7	2002.58	994.084	2316.39	5407.08	2245.68	1785.27	2079.75	1073.26	3867.05	3627.73	1224.41	2740.33	2744.23	964.413	1938.01	2417.99	1475.82	1940.13	2467.92	1276.5
DES	-3.47606	0.565457	-24.0407	0.0209925	-6.91608	0.0717545	TRUE	FALSE	5.38545	18.7201	129.47	1.56981	2.26105	38.2137	15.1903	101.693	1.45974	2.94553	6.50017	30.3888	4.19749	4.3437	2.28858	5.25078	22.15	222.263	0.944826	7.93408	118.846	8.99889	4.50092	3.51582	3.98594	0.377767	618.783
CHI3L2	-1.00781	0.565548	3.23062	0.0120582	3.25585	0.00297459	TRUE	TRUE	31.8966	32.1456	9.8732	58.3412	46.9057	11.3148	17.037	10.1248	2.43283	69.4983	66.3339	7.14104	14.3912	27.2463	4.57707	51.8068	42.2187	28.2279	5.10162	21.51	14.7872	33.561	30.136	4.06515	5.43534	12.6897	6.43958
TBX3	-1.42946	0.566377	-6.49997	5.66045e-06	-4.54715	2.52772e-05	TRUE	TRUE	1.21442	1.73597	7.89371	0.523338	0.908187	6.29789	1.42977	1.19124	11.4339	1.12217	0.500106	3.41188	1.99886	2.56677	15.3656	0.875214	4.90577	7.11635	0.566936	2.64476	7.30239	2.65548	0.717622	5.27368	0.543624	0.453301	6.94797
APOC1	1.01405	0.568506	4.76866	0.00257016	4.70258	0.000594815	TRUE	TRUE	229.784	226.6	48.1864	88.4275	150.836	25.0845	99.1841	68.6398	22.138	461.383	273.004	59.1905	162.898	98.3221	17.6541	664.215	413.116	35.3441	27.775	120.597	4.92915	289.945	515.016	158.535	44.4482	173.271	62.6156
CLSTN2	-1.24057	0.570365	1.92225	0.0235549	2.38469	0.00622186	FALSE	TRUE	10.4697	12.9883	5.44656	8.11029	34.878	2.45517	19.9559	5.9558	9.85265	12.2727	9.0002	3.17385	7.59539	6.99694	3.59629	14.527	16.7983	13.0466	3.59006	12.8708	4.83787	13.0557	7.43623	0.988897	4.65025	9.97052	5.62115
FTX	1.29126	0.571918	-1.7832	0.0150447	-2.30258	0.00385845	FALSE	TRUE	164.604	127.475	293.523	305.308	159.408	292.361	131.054	189.542	394.209	106.385	119.668	401.397	94.3415	104.937	172.291	76.8349	57.9763	200.441	395.846	182.835	96.1173	103.853	100.975	504.377	103.21	104.462	286.987
C1orf204	1.33361	0.57267	-1.88443	0.083896	-2.5131	0.0256785	FALSE	TRUE	1.94043	1.45502	3.65661	2.35467	1.92747	3.73608	4.40824	0.148993	5.10883	1.12217	2.00012	4.12597	1.39923	1.13536	0.653953	0.175123	1.0407	3.08381	2.26744	1.05796	6.20705	2.28667	1.76129	3.62569	1.50989	2.56824	2.71146
A4GALT	1.16828	0.573976	-1.9519	0.0661967	-2.28037	0.0197237	FALSE	TRUE	5.7338	4.90789	11.1918	3.66277	5.96753	5.76418	11.497	5.36023	6.44683	1.89359	1.50012	3.96729	4.79712	4.44242	10.4617	4.90074	9.06815	11.8605	6.2353	7.22884	25.1017	9.44144	4.10954	4.83422	3.44242	1.5863	21.0979
RPP40	-1.12167	0.574062	1.80903	0.0225696	2.02913	0.00601985	FALSE	TRUE	6.91616	7.75764	3.82314	6.80219	7.83932	4.59002	2.20417	7.44473	5.59538	7.99483	11.6669	3.41188	5.19688	2.81357	2.61551	5.60083	6.54099	2.13497	6.80213	6.34729	2.09951	9.07263	8.15375	5.05395	11.6556	11.2546	5.08391
C9orf9	1.16171	0.575809	-1.90763	0.00213603	-2.21611	0.000505515	FALSE	TRUE	6.96648	5.99672	13.2894	4.97086	5.3745	11.3148	5.24221	6.40248	17.5158	6.52213	2.6668	13.1712	11.9927	7.00908	20.2695	2.97549	4.75711	15.4186	6.04635	8.99194	10.4972	11.5805	5.21844	8.1302	6.40161	7.55345	9.99825
TRIM66	1.63727	0.576007	-1.51203	0.0410053	-2.4756	0.0116454	FALSE	TRUE	63.8828	39.0177	96.5925	111.45	59.8234	95.5339	161.082	38.7122	129.3	18.1636	44.3339	95.6086	18.9883	25.2718	37.5966	16.2772	16.501	46.9674	122.626	63.1191	73.7531	24.4887	25.1786	195.016	37.9864	39.2019	98.9644
HBEGF	1.24624	0.576012	2.06019	0.0445679	1.65312	0.134192	TRUE	FALSE	2.62939	2.10985	1.27628	4.97086	2.20545	1.92146	0.953211	1.48903	0.608282	2.80527	3.83348	1.50763	2.99824	0.641768	0.980879	3.32553	2.97323	1.42335	0.755881	2.29214	0.730329	1.84411	1.63083	1.42836	3.38203	1.8129	1.60997
PTH1R	-1.21475	0.576664	-2.31732	0.00818801	-1.90765	0.029691	TRUE	FALSE	1.79673	2.18258	4.16359	1.04658	2.07573	1.17426	2.20417	1.04235	4.13574	0.911781	0.500106	4.20532	2.59849	2.56677	6.53863	0.525168	1.63532	3.55822	3.02322	1.93952	5.29426	3.09804	5.28367	4.50462	0.966365	2.41717	3.89768
LINC00839	-1.06699	0.579917	-2.4762	0.0405276	-2.32074	0.122352	TRUE	FALSE	0.967797	1.03263	2.39646	0.523338	0.871122	0.533811	0.655364	1.34013	2.31119	2.10398	0.500106	2.38041	0.599728	0.691127	0.327026	0.525168	0.44607	3.08381	1.13377	1.05796	5.02043	0.147621	1.23946	3.73555	2.05341	2.11504	1.77943
NAV1	-1.16304	0.580213	-2.16127	0.00498122	-1.85829	0.0185539	TRUE	FALSE	13.6916	15.9239	29.5911	14.9124	10.4524	38.5341	4.8848	22.0362	27.2466	12.1325	5.8335	33.6417	7.39551	20.1385	45.7698	14.877	17.8389	40.0883	21.7288	28.0335	13.053	14.4572	12.7851	11.5361	19.1442	10.2727	26.8596
CRAT	-1.24154	0.580736	5.27698	0.0477815	6.55157	0.0140201	TRUE	TRUE	244.141	303.11	46.2653	238.334	106.633	52.0907	246.626	154.401	35.0315	381.517	662.363	79.1848	55.3658	17.4733	11.4425	491.652	666.302	16.6047	8.12475	39.3174	17.343	510.368	435.306	83.6083	21.1372	343.085	74.8166
KRT73	1.33516	0.580893	-2.22079	0.00328104	-2.9651	0.0125342	TRUE	TRUE	2.91578	2.18386	6.47536	14.4568	3.50877	18.1076	0.898461	1.49384	5.70101	0.422277	1.00011	6.10993	2.40847	5.09846	3.6609	1.22526	1.33801	5.24315	1.88955	1.76321	1.71142	0.753908	1.89574	4.899	1.27154	1.3727	6.36989
SRXN1	-1.20038	0.584436	1.78961	0.101053	2.14821	0.0329888	FALSE	TRUE	9.70195	11.646	5.42126	8.89514	5.39302	4.8035	19.1219	11.7626	4.37901	5.96109	13.5003	2.37195	2.99824	2.76421	1.63473	5.4258	12.3386	3.08381	4.53479	5.46573	11.5012	19.9892	23.2869	7.80061	10.6894	18.6569	7.79527
STAB1	-1.14307	0.588142	-2.8054	0.0127325	-2.45426	0.0428053	TRUE	TRUE	2.46363	2.81612	6.91148	1.04658	1.85334	2.45517	1.96589	5.36023	8.14974	2.3845	1.66679	1.66632	0.799604	2.86293	3.92322	2.80046	3.27055	13.0466	4.34584	1.41059	6.29833	2.803	2.47881	2.63689	3.5632	3.62571	17.1156
CLIC3	1.4961	0.589139	-1.63766	0.020804	-2.45011	0.00581839	FALSE	TRUE	19.8212	13.2486	32.4605	45.7834	13.2508	22.8429	46.1071	23.8229	49.0192	6.17148	6.33351	14.52	6.79588	9.92126	35.962	3.67558	7.43293	39.3767	16.6273	25.5651	44.2701	20.7267	8.93651	19.8859	12.6823	10.7259	33.8073
HMGA1	-1.10549	0.589665	3.13466	0.125161	3.46535	0.0428891	FALSE	TRUE	49.5501	54.7773	15.8072	61.4806	72.2604	1.70798	2.44245	39.6055	6.81174	1.96372	1.50012	1.42829	81.9492	80.1093	27.135	75.7849	68.2326	34.1581	27.7751	42.1383	9.58436	69.3347	73.0565	21.3142	75.6701	61.3159	24.3176
CDH19	1.68045	0.590478	-2.09757	0.0294015	-3.52486	0.00850428	TRUE	TRUE	4.78499	2.84744	10.0369	0.261719	1.79774	5.44396	4.11039	3.27574	2.6761	3.08579	0.833443	4.36401	14.9908	4.5905	12.4233	5.07576	4.60845	9.96285	2.83428	2.99738	21.3593	5.38462	1.95698	5.93288	2.53655	2.71931	18.1324
KIF17	-1.39828	0.593797	-2.48718	0.00793466	-1.77874	0.027293	TRUE	FALSE	1.57933	2.20835	3.92809	2.35467	1.46416	1.38775	1.42977	0.893455	3.77083	1.33256	0.333437	2.85647	0.599728	3.65267	6.2117	1.75033	3.4192	4.98147	1.51166	3.52631	3.55997	1.84411	2.41358	4.50462	1.81185	1.96397	4.15188
CDK15	-1.20329	0.594238	-2.31868	0.0055245	-1.92694	0.0194951	TRUE	FALSE	1.52099	1.8302	3.52668	0.784957	1.27883	1.81472	1.25106	0.744563	2.31119	2.8754	0.833443	2.5391	0.99948	1.43151	4.57707	1.22526	2.82458	8.06518	1.13377	3.87893	2.82974	1.18027	1.76129	2.85662	2.71772	1.88844	3.21984
SLC31A1	-1.11104	0.594963	1.87312	0.0371139	2.08111	0.0111409	FALSE	TRUE	65.6535	72.9435	35.0503	57.5564	50.3898	34.1576	26.8063	21.2918	14.2316	105.754	103.335	27.8497	71.1558	79.2693	62.116	110.263	119.965	31.0744	20.7841	49.5425	33.4077	84.2331	78.405	24.6101	48.6752	81.3493	52.9551
MFAP5	1.00162	0.595109	-2.11455	0.102311	-2.11798	0.03461	FALSE	TRUE	2.05023	2.04691	4.33531	1.04658	0.77846	3.73608	3.6934	2.97795	0.851555	1.05204	0.500106	1.03157	2.99824	1.62895	7.19248	0.525168	6.24368	5.21868	2.64533	0.352721	6.11577	1.84411	2.60927	4.94408	2.59694	1.28417	5.59228
WHAMMP3	1.17775	0.59599	-2.22026	0.0429266	-2.61492	0.0131183	TRUE	TRUE	1.67218	1.41981	3.71269	1.56981	1.88704	2.24169	2.20417	0.827363	8.27138	1.47282	1.66733	3.25319	2.19873	2.02437	8.17326	0.525168	1.0407	1.8768	2.26744	2.11583	1.18672	1.99163	0.587201	1.64809	1.14769	1.20864	3.05038
CCDC102B	-1.03287	0.597351	-3.30145	0.00745385	-3.19639	0.0254708	TRUE	TRUE	2.98216	3.08018	9.84545	1.56981	2.39077	1.49449	5.95704	4.16909	8.14974	1.96372	2.00012	3.01516	3.99762	4.14626	4.57707	0.350145	4.31114	10.9117	6.2353	2.29214	9.76691	1.54907	4.50092	29.664	2.23459	0.830968	11.1845
KIF26B	-1.1447	0.597893	-2.43464	0.00109495	-2.12689	0.00415826	TRUE	TRUE	13.9085	15.921	33.8622	29.0398	21.7942	36.9329	6.25489	9.52922	31.8688	13.5351	6.66684	39.5133	14.3912	20.0892	66.6931	8.92626	12.3386	42.2232	11.7147	29.2677	14.2396	16.5962	10.7629	19.007	10.8102	16.9196	20.42
RP11-404P21.8	-1.11875	0.597919	-2.11518	0.0136571	-1.89066	0.0442607	TRUE	FALSE	1.54733	1.73109	3.27289	0.784957	1.34288	3.73608	0.953211	1.04235	4.37901	1.96372	0.500106	3.57057	0.399852	1.82639	6.31406	1.5753	1.78398	2.60939	3.21217	2.29214	1.80443	0.928599	1.43514	2.41377	2.56085	3.62571	1.35578
NDRG4	-1.02429	0.599201	-2.69627	7.07551e-05	-2.63232	0.000282208	TRUE	TRUE	10.1984	10.4462	27.4977	23.0226	7.45012	45.1521	17.2753	19.505	41.3565	6.31174	10.6669	23.2477	6.19625	5.08408	14.7118	7.00101	11.4467	24.4326	3.59006	10.0498	20.1727	11.0642	11.2848	25.4891	7.1263	8.08218	25.4192
ARMCX4	-1.36795	0.599474	-2.75776	0.0360705	-2.01597	0.104819	TRUE	FALSE	2.33542	3.19475	6.44053	2.35467	3.41006	6.2979	4.22953	7.29584	5.23047	3.01566	6.83351	12.6158	0.399852	0.493691	0.980879	0.350145	0.594727	1.66056	4.91268	4.05524	4.01636	2.21291	1.5152	14.2827	1.20793	1.3597	6.43959
CELF2	1.38836	0.600219	-1.4986	0.13052	-2.0806	0.0464985	FALSE	TRUE	7.90071	5.69067	11.84	4.70924	7.69104	7.79228	24.4831	5.21134	18.6105	2.80527	1.83345	5.63351	7.39551	4.0969	3.59629	2.62544	8.02756	7.11635	5.29057	7.22884	25.2843	9.73648	6.97964	11.0966	6.16004	4.45658	15.5905
HUS1	-1.08468	0.60131	-2.04328	0.00202184	-1.88377	0.00738855	TRUE	FALSE	24.5766	26.6577	50.217	16.7437	21.4422	37.0396	23.7087	36.6277	93.9028	25.7375	27.0005	54.0328	16.0945	18.3123	22.2311	16.1022	18.5822	28.7023	44.0245	39.3173	33.7731	23.8248	26.2222	71.3029	30.3769	25.757	60.7512
PMP22	-1.04871	0.60158	-2.01724	0.00194914	-1.92355	0.0071286	TRUE	FALSE	44.4395	46.604	89.645	12.5578	38.9004	65.6466	32.0484	58.0683	76.1446	31.4882	21.5003	57.1272	60.3628	31.047	73.2316	31.8543	70.612	99.1533	60.0849	55.8907	127.152	45.289	52.2487	59.3278	81.8307	44.5649	159.377
MAP6	1.76656	0.602157	-2.53004	0.0499748	-4.46946	0.13822	TRUE	FALSE	4.788	2.71035	12.1138	3.92438	3.00235	17.7193	6.49317	3.72241	9.0012	3.50656	0.833443	6.10957	10.5935	1.38215	17.3272	0.875214	3.4192	4.03264	0.0001	7.22884	18.7122	8.92512	1.5656	4.94408	3.98594	0.528834	19.0644
AVIL	1.7537	0.602269	-1.56133	0.0533249	-2.73811	0.0170262	FALSE	TRUE	11.0092	6.27768	17.189	25.6388	10.7489	13.3429	28.236	6.10469	35.518	4.83902	5.50016	16.7416	1.19936	2.81357	7.19248	2.2754	3.12189	7.82797	12.2815	6.52359	8.39773	7.08111	5.74027	29.2245	6.52239	9.66839	19.2668
SYNM	1.44149	0.603132	-2.37525	0.12244	-3.42389	0.0435853	FALSE	TRUE	21.3056	14.7803	50.606	10.4136	20.1276	29.6995	54.4079	24.0948	10.8226	11.1221	6.43265	5.75861	40.2672	11.83	33.2559	6.12589	21.9675	54.7228	12.0084	22.2029	140.751	29.781	5.56935	13.3705	6.31865	6.01744	116.467
ITPR1	-1.24117	0.603903	-2.78915	0.0241309	-2.24719	0.0725607	TRUE	FALSE	6.9074	8.57328	19.2658	7.84867	9.82226	9.17993	5.12307	5.21134	5.47374	9.60781	5.50016	4.52269	9.9939	11.1059	43.4813	4.55069	15.1631	25.1442	4.53479	15.3391	25.4668	11.728	3.19633	6.37235	1.87224	3.24804	34.4854
NOV	-1.18436	0.604708	-3.69786	0.00398507	-3.12225	0.0138739	TRUE	TRUE	7.68501	9.10178	28.4181	8.89514	9.52574	73.759	2.02546	18.165	6.20356	8.20523	1.83345	7.53776	12.3924	5.82447	25.8273	1.92535	7.8789	19.9256	3.21217	17.2785	19.625	14.6784	8.15376	14.3926	10.1459	4.15444	60.0737
RARB	1.04162	0.604893	-2.21197	0.0378741	-2.30402	0.0117834	TRUE	TRUE	3.98429	3.82511	8.81311	2.87791	2.05719	5.97766	6.4336	7.14694	6.08192	3.29618	1.00011	4.99875	4.997	3.70203	12.7502	1.75033	2.08129	14.707	3.96795	8.63932	12.1401	6.19597	3.78339	1.64809	2.35537	2.19057	12.2012
AC114812.5	1.67388	0.604908	2.5383	0.0408021	1.51642	0.115046	TRUE	FALSE	16.1208	9.63081	6.35104	46.8511	14.0365	13.4564	1.13192	15.5172	3.52753	21.6426	5.81445	8.54052	8.63493	11.3431	16.3434	13.0096	3.13555	1.9973	6.99108	6.93156	0.730329	8.46889	5.80551	1.8417	22.2365	14.4626	4.37114
SCN7A	1.00832	0.604911	-2.45049	0.0220421	-2.47089	0.066728	TRUE	FALSE	4.92976	4.88908	12.0804	0.261719	1.77921	3.09563	0.774503	2.0846	3.40592	3.15592	0.833443	3.8086	17.9889	9.5264	21.9042	5.42581	10.7034	22.2977	3.40111	8.6442	17.5256	6.85983	3.65294	6.81181	1.57028	1.88844	17.7934
CTBP2P8	1.29881	0.607639	-2.20002	0.0298165	-2.85742	0.00916351	TRUE	TRUE	4.66133	3.58891	10.255	2.09305	1.63797	3.41585	10.474	2.82906	25.5438	1.40269	1.00011	3.57057	1.39923	2.92417	5.55785	1.75033	1.48667	5.93031	6.99108	5.81835	15.6087	7.74495	5.23493	12.415	5.43534	7.78005	9.99825
PTPLB	1.01998	0.609452	2.05638	0.093345	2.0161	0.0326193	FALSE	TRUE	132.022	129.436	64.2013	27.9933	108.338	29.8107	149.479	45.939	54.827	168.573	236.208	43.4278	206.87	100.371	38.6041	256.411	194.146	83.0701	24.5524	105.257	82.9729	143.536	123.868	97.5617	78.764	121.365	83.3363
KLRG2	1.11648	0.610462	-2.00862	0.0445094	-2.24257	0.0143324	TRUE	TRUE	6.96719	6.24034	13.9944	12.5578	8.00609	5.12373	12.9267	0.744563	9.60938	3.78708	3.1668	5.55416	4.59725	4.14626	22.8849	1.22526	6.09502	23.2465	4.34584	17.2785	17.4343	11.9493	2.47881	10.9867	4.34829	8.00665	17.1156
RUNX3	1.09045	0.610519	-2.62731	0.000926449	-2.86495	0.003383	TRUE	TRUE	16.3268	14.9726	42.8957	14.6508	10.2114	46.2195	48.1322	25.3118	43.546	10.239	8.16686	19.2013	12.7922	14.7091	44.4621	2.10037	12.1899	27.9907	3.21217	30.8545	84.5241	21.6119	10.6325	26.8075	17.876	7.70452	50.4142
SEMA3C	1.07603	0.610856	-2.12456	0.000782172	-2.28609	0.000206965	TRUE	TRUE	62.6174	58.1931	133.035	96.5375	86.676	147.304	30.8571	92.3135	101.202	90.4669	43.5006	119.49	80.5501	43.4854	178.502	28.8788	41.9213	156.795	56.4947	99.7919	99.6764	65.942	35.8762	91.8483	51.2121	21.9803	169.46
CDA	-1.08327	0.611617	-4.58619	5.87668e-05	-4.23365	0.000223786	TRUE	TRUE	2.69709	2.92168	12.3693	3.40115	1.55682	11.208	0.595794	4.61577	7.6632	3.92734	2.16679	6.98235	1.79898	2.51741	29.7504	0.525168	1.0407	6.64193	2.0785	7.22884	11.5012	5.38461	2.28312	6.48221	3.86516	1.96397	18.7254
JAKMIP3	1.28404	0.611862	-2.16576	0.0060698	-2.78092	0.00171012	TRUE	TRUE	3.64315	2.83726	7.89018	7.06381	4.92971	11.635	7.56542	3.87131	12.7726	2.3845	4.50015	11.6636	0.99948	1.9251	5.88477	3.15051	1.93264	4.98147	4.34584	2.64476	3.92508	2.06539	1.76129	3.95529	1.57028	1.1331	8.30365
ANO5	1.14026	0.615617	-1.82386	0.110913	-2.07968	0.040437	FALSE	TRUE	2.44602	2.14513	4.46119	2.61629	2.42795	2.7754	4.22953	3.42463	1.94628	2.24424	1.83345	1.98369	3.79774	2.61613	11.7694	2.2754	1.78398	2.54462	0.755881	3.52631	6.75472	2.13915	0.717622	2.74676	1.50989	0.830968	5.16864
CPT2	-1.12569	0.616	1.83191	0.0753637	2.06216	0.0261718	FALSE	TRUE	14.1374	15.9143	7.71729	5.23248	9.37745	5.76418	10.7226	5.50912	3.88543	19.496	25.8337	7.53696	12.7922	7.40396	8.17326	23.2781	22.1499	5.21868	4.53479	11.4603	9.85819	25.4475	23.2217	9.7782	11.5953	22.358	11.5234
FAM20A	1.37976	0.616151	-2.13103	0.00730997	-2.94032	0.00211028	TRUE	TRUE	1.99949	1.44916	4.26098	2.61629	1.92747	4.91024	5.95704	0.893455	5.10883	0.771522	0.666774	1.66632	0.99948	1.43151	1.63473	1.5753	1.78398	3.55822	1.88955	2.11583	7.75878	1.40155	1.5656	5.38355	0.78519	1.20864	4.06714
KLHDC7B	-1.61511	0.617845	16.6171	0.00138534	26.8384	0.000380225	TRUE	TRUE	8.21397	13.2664	0.494309	36.1035	58.4512	0.0001	2.44245	17.4205	0.243373	15.2883	7.16685	0.158787	1.39923	15.6469	2.61551	6.65096	1.93264	0.474517	0.566936	1.41059	0.182657	1.32779	3.19633	0.109966	1.93263	0.906502	0.16956
PDE3B	-1.88397	0.618326	2.02851	0.106141	3.82164	0.038784	FALSE	TRUE	3.94649	7.43506	1.94551	2.61629	23.2212	3.73608	13.7011	3.72241	0.0001	2.59488	2.00012	1.58697	4.19749	5.4296	1.30781	0.525168	14.1225	5.6931	2.45639	1.23427	1.36928	2.58172	8.08853	0.769164	2.89889	1.66184	1.10159
TRIM33	-1.22436	0.619141	-2.04954	0.0394785	-1.67397	0.107577	TRUE	FALSE	21.6107	26.4592	44.292	14.1275	18.1618	62.8713	28.7721	68.6396	81.1317	18.0233	29.6671	33.4831	17.9889	12.9815	9.48096	8.57621	15.609	17.7907	26.6414	18.3364	38.8848	26.6276	27.6573	71.6329	32.1284	20.6207	39.0607
RP11-296I10.6	-1.05003	0.625693	-2.01739	0.00286748	-1.92126	0.00947294	TRUE	FALSE	16.142	16.9496	32.5647	21.6196	16.348	29.309	26.7924	23.3204	48.3045	10.3506	18.3218	41.6573	12.0957	16.1286	28.5337	4.39715	5.77921	18.0797	22.9944	20.6636	22.0817	19.3234	16.458	49.141	11.5627	18.5774	23.4105
IL16	1.26115	0.625703	-1.70333	0.019954	-2.14815	0.00632387	FALSE	TRUE	4.3067	3.4149	7.33574	2.35467	2.39078	5.33721	6.01661	4.0202	7.05502	2.10398	1.66679	4.12597	0.99948	1.62895	8.17326	1.92535	4.16248	11.1491	7.55791	1.76321	7.57623	7.81871	7.30578	6.37235	5.67691	4.38104	8.89676
SULT2B1	1.09321	0.626736	2.89508	0.00213076	2.64825	0.00711399	TRUE	TRUE	30.4513	27.855	10.5183	34.7954	13.2137	8.85971	42.6518	20.9939	11.069	24.2648	25.3337	4.04663	6.99576	6.56486	5.23092	27.3036	35.8263	8.30239	17.761	16.397	13.6919	55.1729	61.3808	15.4912	34.6648	43.1297	17.4545
PDZK1	1.37449	0.62739	5.7524	0.0607767	4.18511	0.0213599	FALSE	TRUE	143.396	104.327	24.9281	318.39	127.316	16.5412	63.6203	44.6679	14.7164	236.684	220.669	60.5343	72.8985	22.0604	6.2117	378.399	237.256	15.6496	3.83103	41.08	0.912886	71.0307	98.2097	43.617	2.31819	43.3556	41.2417
TMTC2	-1.21693	0.627501	-2.18091	0.0305528	-1.79214	0.0837836	TRUE	FALSE	9.63865	11.7296	21.0211	19.0983	16.364	26.5789	15.4882	22.7807	40.9917	8.20524	17.0003	29.5954	3.39799	4.63986	3.92322	3.8506	2.67592	12.0977	7.18002	10.2261	22.6373	10.1053	9.19744	18.7873	9.78355	10.9525	13.5569
ABCA10	-1.14128	0.628376	-2.62352	0.00216148	-2.29876	0.00717156	TRUE	TRUE	2.05847	2.34928	5.40042	1.30819	1.68747	2.34843	3.40238	5.24397	11.4339	1.96372	1.50012	3.73222	0.399852	2.51741	4.25657	1.92535	1.0407	5.69968	3.21217	3.52631	4.75822	1.47797	2.21789	4.1839	2.77811	1.06038	6.79047
PHACTR2	1.17578	0.630252	2.11452	0.0139058	1.7984	0.0407832	TRUE	FALSE	4.42493	3.7634	2.09264	2.35467	1.59388	1.92146	2.20417	2.23349	1.82465	4.83902	5.16682	1.90435	6.19625	5.03472	1.63473	9.97639	7.13562	1.42335	3.77901	2.82107	4.65531	4.05693	3.32679	1.42836	1.99302	2.79484	1.94889
ABCA9	1.17306	0.633908	-2.14387	0.00592622	-2.51488	0.018288	TRUE	TRUE	4.71066	4.01571	10.099	0.261719	3.66952	4.91024	12.748	6.25359	9.36611	3.08579	2.83347	5.87154	3.59787	2.36933	6.53863	1.92535	2.67592	13.9954	7.18002	3.52631	15.2436	6.7123	8.15376	10.5473	2.1742	2.64377	14.3195
GIMAP5	-1.19464	0.637239	-2.81093	0.0253053	-2.35296	0.0688541	TRUE	FALSE	3.82844	4.57359	10.7615	1.56981	4.9297	3.41585	6.49316	1.9357	2.79774	3.08579	2.83347	2.38041	7.19563	4.19562	27.135	4.20064	12.3386	8.77681	4.34584	4.58418	23.1849	1.62283	2.6745	7.471	2.1138	3.09697	10.9303
FAM156A	1.67388	0.637254	-1.24554	0.075409	-2.08488	0.0279977	FALSE	TRUE	165.223	98.7071	205.792	478.845	213.514	228.925	403.228	99.7335	336.479	94.305	108.191	321.284	24.7847	55.5501	98.3243	49.0057	49.5672	124.372	147.752	131.868	168.259	58.5793	56.0585	205.677	65.2879	75.1742	163.018
MKNK1	-1.09127	0.638837	-2.23275	0.0708816	-2.04601	0.0262645	FALSE	TRUE	1.88835	2.0607	4.21621	2.61629	2.0016	5.76418	3.57427	7.29584	9.85265	0.631264	0.833443	3.96729	0.599728	1.13536	0.980879	1.92535	0.148757	2.37218	1.88955	1.41059	2.73846	2.36044	1.69606	4.83422	1.50989	1.96397	3.21984
PLA2G7	-1.12869	0.640654	2.3574	0.0528392	2.66076	0.0190988	FALSE	TRUE	7.30614	8.24635	3.09924	5.4941	4.55907	1.60123	0.714933	5.80691	0.973192	16.1298	25.1671	4.76072	7.79526	3.2578	0.653953	12.0767	7.28427	0.948933	2.26744	2.46845	3.10357	9.44144	10.1759	6.48221	4.52947	7.25132	6.27013
UIMC1	1.17884	0.641692	-1.81602	0.0464521	-2.14079	0.0166396	FALSE	TRUE	20.2776	17.2014	36.8246	31.656	24.7037	51.2363	39.7327	44.9656	70.1844	8.90652	11.8336	30.4681	16.19	8.68729	15.6926	4.37567	6.54099	16.1303	30.7982	10.9314	18.8948	14.0146	12.198	59.8771	16.5474	17.7505	32.1128
GPCPD1	-1.07693	0.642947	-2.50674	0.00010521	-2.32768	0.000355675	TRUE	TRUE	25.9736	27.9718	65.1092	47.0915	28.7612	101.506	18.1688	30.213	72.49	21.6701	48.9859	75.4515	19.5879	18.8553	43.1493	13.1221	12.4873	38.9023	43.8289	34.2021	37.14	27.2915	21.1926	87.3387	17.0282	29.0768	64.8961
ADRB2	1.16883	0.643048	-2.13775	0.0277944	-2.49866	0.00957414	TRUE	TRUE	7.58596	6.49022	16.2169	15.174	9.41455	29.7812	9.23336	10.1248	31.0174	2.66501	2.16679	8.72791	4.39737	1.82639	4.57707	4.20065	4.01383	11.3861	3.59006	6.34728	23.2762	7.59743	8.28421	10.5473	13.8298	9.74392	10.4219
CTD-2328D6.1	1.71821	0.64494	-1.46	0.0825927	-2.50858	0.0317279	FALSE	TRUE	141.091	82.1152	205.992	413.096	95.4604	187.546	24.2449	28.5875	45.1272	17.322	54.334	144.406	100.338	120.041	169.021	82.4358	56.341	134.972	300.045	120.773	312.629	98.5441	92.1038	447.156	92.7011	89.2807	207.08
KLK14	-1.33376	0.645995	-2.70076	0.0912038	-2.02492	0.0355583	FALSE	TRUE	8.12257	10.8336	21.9371	6.80219	14.2701	3.84282	17.9901	8.33808	42.573	6.38186	2.33346	12.3777	5.7965	12.9322	37.2697	3.15051	6.98696	22.7721	12.0926	39.4936	25.5581	4.13068	0.652393	3.73555	8.63609	1.66184	27.3679
LY6G6D	1.4605	0.648246	2.83953	0.0114999	1.94421	0.0324205	TRUE	FALSE	6.10321	4.17884	2.14937	16.7437	1.44541	11.208	0.650386	9.08254	1.09483	1.12217	2.16679	0.316594	5.99638	6.66358	1.63473	6.30092	4.15904	0.474517	2.36083	0.705343	0.456493	9.55167	6.2621	0.82347	6.09965	2.94591	1.18632
PALLD	-1.18515	0.648653	-2.2887	0.047449	-1.93114	0.117054	TRUE	FALSE	2.93822	3.48223	6.72468	3.66277	4.04015	12.7024	8.93552	11.3159	18.1239	1.82346	2.6668	4.36401	3.59787	2.1719	1.30781	1.22526	2.37861	4.98147	1.32272	1.05796	6.0245	1.54907	2.41358	4.17502	1.38911	1.8129	2.11835
CHRD	1.18499	0.650633	-1.83243	0.0282674	-2.17141	0.00999852	FALSE	TRUE	4.80565	4.05543	8.806	1.56981	1.81627	4.05631	7.62499	7.44473	12.2854	1.47282	1.33345	4.52269	5.19687	5.08409	6.86555	2.97549	3.12189	9.48843	8.50264	6.34728	14.9698	4.27821	4.50092	6.48221	6.82435	2.79484	11.7776
MATN3	-1.04306	0.652384	-2.50094	0.0483841	-2.3977	0.11795	TRUE	FALSE	1.20331	1.25512	3.00941	1.30819	1.01938	5.23047	2.26374	1.9357	0.243373	0.350746	1.33345	1.2696	2.59849	1.43151	1.63473	0.700191	1.18935	2.37218	0.566936	0.529032	4.92915	0.811465	1.69606	3.73555	1.02676	0.906502	4.66025
NUAK2	1.27279	0.65363	-1.80051	0.0143721	-2.29166	0.00490858	FALSE	TRUE	4.4327	3.48267	7.9811	7.32543	2.98381	8.75296	6.55274	6.02474	16.7859	1.89359	2.50013	6.66497	0.99948	3.15908	5.23092	2.97549	1.78398	5.45589	3.02322	2.99738	8.1239	6.04846	3.06587	7.58087	6.64317	5.34638	5.25337
ADAMTS15	1.33308	0.654335	2.39348	0.0156229	1.79546	0.0422351	TRUE	FALSE	39.3048	29.4842	16.4216	135.257	36.1382	35.9722	32.108	12.8074	11.9205	32.1894	45.0006	25.8662	16.5898	30.504	13.731	35.1797	36.421	13.0466	29.6645	43.3725	8.85413	19.6204	19.2427	8.67954	13.8298	12.3876	13.3027
FAR2	1.03787	0.656274	4.83415	0.0739164	4.65774	0.0290373	FALSE	TRUE	44.1567	42.5453	9.13432	33.2257	32.5427	3.84282	11.5566	19.2072	8.14975	173.289	154.167	30.7855	13.5917	3.80075	1.30781	79.9855	54.7059	0.0001	0.566936	7.93408	0.821608	39.83	43.834	11.6445	1.20793	24.1708	16.5225
RASD2	1.16627	0.656407	-2.28591	0.0503861	-2.666	0.0190612	FALSE	TRUE	2.3573	2.02122	5.38857	4.186	2.66876	5.23047	2.08503	3.12684	1.58137	2.31437	0.166769	3.09451	4.19749	2.41869	11.7694	0.875214	2.37861	8.5396	0.377991	3.35	5.5681	3.61436	1.30468	1.64809	1.20793	0.755435	5.67702
EGFL7	1.01799	0.658309	-2.49695	0.00270785	-2.54187	0.0080398	TRUE	TRUE	6.65996	6.54227	16.6296	2.09305	4.18842	11.208	23.3513	13.6982	12.0421	4.13773	2.50013	5.79219	2.59849	3.70203	12.7502	4.55069	6.09502	9.25122	6.80213	7.40515	42.5359	5.45837	9.91495	13.9531	4.2879	4.83424	25.5039
THSD4	-1.02654	0.658387	-3.54397	0.000605926	-3.45235	0.00188929	TRUE	TRUE	8.53104	8.75743	30.2337	2.61629	7.06096	23.8036	1.54891	6.25359	6.93338	14.587	5.50049	17.4557	10.7934	9.13153	57.2122	8.40119	9.06815	63.0975	9.44736	15.3391	27.2011	11.433	4.10954	14.3926	9.4212	13.5961	31.7739
FDPS	-1.02156	0.659379	1.97224	0.086475	2.01476	0.0348864	FALSE	TRUE	211.821	216.388	107.401	153.295	149.716	70.2307	697.934	202.768	67.0168	114.988	448.628	37.9162	135.064	45.6064	29.7435	250.804	276.92	38.1907	40.4345	93.6162	80.4899	246.994	354.86	389.653	55.058	158.992	145.971
GPR133	-1.11832	0.661896	-2.47663	0.00316081	-2.21459	0.0092097	TRUE	TRUE	3.30032	3.69083	8.17367	7.06381	4.7444	11.1013	2.1446	5.21134	5.83865	1.33256	1.16678	4.20532	1.59911	4.14626	15.3656	1.75033	3.12189	8.5396	7.18002	7.22884	4.83787	3.76188	3.00065	5.16382	1.57028	0.906502	10.3372
RP11-463C8.4	-1.3371	0.662113	2.57765	0.0655729	3.44658	0.0259019	FALSE	TRUE	3.17725	4.24831	1.23262	2.35467	0.815525	1.38775	2.50202	4.16909	0.121736	4.90915	6.00017	1.66632	0.399852	0.444332	0.0001	6.82599	7.43293	0.711725	0.566936	2.11583	0.182657	7.37615	8.0233	1.97769	0.483232	4.98531	3.81295
FSD1L	1.08573	0.663144	-1.93692	0.0428235	-2.10296	0.0163127	FALSE	TRUE	3.63325	3.34638	7.03733	1.30819	2.39078	5.76418	5.18264	6.37033	8.87956	2.45463	5.00016	6.03022	2.19873	1.38215	1.96166	2.45042	1.33801	3.55822	5.07467	2.99738	7.11983	6.04846	5.47935	14.1729	4.34829	1.8129	8.81204
TNNT2	1.24798	0.663242	-2.39083	0.0127652	-2.9837	0.0341294	TRUE	TRUE	26.8912	21.5478	64.2922	98.1071	37.0842	97.5637	2.32331	30.8208	76.9964	10.5195	9.33353	139.246	10.5935	17.9668	65.3853	7.00101	8.91949	36.2929	46.6696	36.4964	7.30239	14.9735	10.7629	26.4779	24.9418	20.9984	65.0734
AP001053.11	-1.11127	0.663382	2.67744	0.0794737	2.97536	0.0321507	FALSE	TRUE	3.5222	3.9141	1.31551	5.4941	2.66876	0.533811	0.178808	3.27574	2.1912	4.13773	4.83349	2.14238	1.59911	1.43151	1.96166	6.65096	5.94636	0.0001	1.70061	1.5869	0.182657	7.44991	7.56669	1.64809	0.966365	4.00338	1.86416
WFDC3	1.13346	0.667527	-1.85847	0.0533353	-2.1065	0.0210039	FALSE	TRUE	24.5739	21.6805	45.67	45.5218	23.8327	111.012	50.9319	23.674	16.0561	14.1662	7.66685	19.2013	11.9927	11.7475	30.4043	9.80137	17.8389	63.0976	10.3921	69.6428	62.0696	43.5187	8.08853	33.2896	10.2667	10.9525	30.2297
RP11-567I13.1	1.19145	0.668031	-1.89409	0.0708986	-2.25671	0.0287431	FALSE	TRUE	10.9732	9.20997	20.7842	25.6388	16.524	50.9162	12.331	14.2004	28.9324	6.38187	7.85177	32.8484	3.99762	6.86101	13.0772	8.05115	4.31114	10.4373	12.4705	8.99194	13.8601	10.8101	8.88575	10.9867	8.10484	6.05377	5.21564
RASL10B	-1.27302	0.671372	1.76801	0.0311729	2.25071	0.0118875	FALSE	TRUE	2.26306	2.88092	1.28001	1.56981	7.2092	2.34843	2.32331	1.48903	0.486646	2.59488	1.16678	1.50763	2.99824	2.41869	1.30781	1.22526	3.86517	1.66056	2.45639	2.11583	1.18672	3.24556	3.19633	1.3185	1.69106	1.5863	0.42375
ZNF112	1.43603	0.671631	-1.59469	0.0794212	-2.29002	0.0329339	FALSE	TRUE	11.322	7.8842	18.055	9.03526	6.85621	18.4446	45.0142	20.9997	36.8631	5.32636	10.1376	15.981	5.95715	3.35327	4.17593	2.12921	3.25518	6.23681	9.3089	6.29906	17.293	6.41569	5.11619	32.2006	7.38887	7.05637	13.2448
RNF220	-1.63686	0.673351	-4.63665	0.0021132	-2.83265	0.00602718	TRUE	TRUE	0.709188	1.16084	3.28825	0.523338	0.77846	1.81472	0.953211	4.46688	6.44683	0.350746	0.166769	3.41188	1.19936	0.888563	7.51941	0.700191	0.89204	3.32102	1.32272	1.41059	1.278	0.442663	0.456705	0.988897	0.181275	0.2267	1.52524
ADAM33	-1.25198	0.673422	-3.22634	0.0176505	-2.57699	0.0065238	TRUE	TRUE	2.98317	3.73487	9.62472	2.61629	1.68655	5.97767	4.58695	15.1871	8.27138	1.54294	0.333437	2.69779	4.19749	0.740486	2.61551	0.700191	3.71651	12.8093	3.21217	2.82107	19.8076	4.35197	2.6745	6.26248	2.65733	2.71931	18.556
ADIRF-AS1	-1.19556	0.673474	-2.57107	0.0034104	-2.15052	0.00953296	TRUE	TRUE	3.35773	4.01436	8.63295	3.40574	3.06518	5.34303	1.97394	2.68724	5.47562	1.12472	1.16748	6.27144	3.19811	2.76727	9.16199	6.1259	7.29431	12.3715	3.78088	8.11853	8.6782	3.32319	3.91715	3.18789	3.92934	3.09772	18.5739
AC008065.1	-1.03681	0.676594	-2.0827	0.0643415	-2.00876	0.0265179	FALSE	TRUE	1.98225	2.05521	4.12842	4.97086	2.48337	3.94956	2.08503	6.40248	9.0012	0.701393	2.16679	2.69779	1.39923	0.444332	2.28858	1.05024	0.297413	1.18614	1.51166	1.76321	5.02043	1.18027	1.82652	2.52702	2.95929	1.05757	6.35666
AGPAT1	1.00811	0.677644	4.53293	0.00652185	4.49649	0.0023282	TRUE	TRUE	305.971	303.511	67.4997	139.103	265.909	42.2386	246.911	59.0555	31.504	414.201	536.782	72.9221	158.446	101.556	86.9626	877.14	635.333	72.2923	46.2917	158.812	69.2883	517.805	471.005	71.4131	47.8741	199.637	93.3764
PXMP4	-1.25965	0.67815	2.62724	0.00663015	3.30941	0.00237257	TRUE	TRUE	70.3055	88.5605	26.7602	50.231	49.9828	10.7811	77.6184	17.2716	14.4748	71.7424	109.501	18.5665	50.169	34.1073	18.9618	138.094	142.859	18.2651	17.9499	46.0172	40.8017	112.855	159.946	45.375	43.784	148.799	46.8557
AC006262.6	-1.1542	0.678268	-2.27187	0.0167693	-1.96835	0.0420286	TRUE	FALSE	2.08457	2.40601	4.73588	4.70924	1.35296	4.26979	3.15728	7.74251	10.3392	0.911781	0.833443	2.14238	0.199976	1.28344	3.92322	1.75033	0.89204	2.13497	1.88955	2.82107	3.0123	2.06539	2.28312	6.81181	1.99302	2.0395	5.25337
PGM2L1	-1.04566	0.679142	-2.08652	0.0281345	-1.99541	0.0674332	TRUE	FALSE	3.18259	3.3279	6.64054	1.04658	3.85484	3.84282	0.357517	3.72241	2.79774	4.62863	0.666774	6.03022	5.19687	5.38024	11.4425	2.80046	3.56786	8.5396	4.53479	4.9368	3.0123	3.39308	2.15266	4.83422	3.50281	2.34164	12.6249
RHOG	-1.13465	0.679595	2.26022	0.0114302	2.56457	0.00421212	TRUE	TRUE	4.25	4.82228	1.88035	4.97086	5.00384	1.49449	1.48934	5.36023	0.650319	1.82346	1.00011	0.714194	5.7965	6.5155	3.59629	6.1259	7.43293	2.13497	2.64533	3.87893	2.00823	5.53214	4.17477	1.64809	5.61651	5.21191	2.79619
ACAP3	-1.25362	0.679645	-2.43724	0.0140729	-1.94416	0.0355806	TRUE	FALSE	51.3939	64.4285	125.259	98.6306	66.4217	141.112	49.6813	193.264	346.169	20.4778	35.6671	92.8323	27.1832	22.3105	37.2697	15.5771	17.0956	62.3858	76.1448	72.2876	74.2099	55.3945	46.4436	132.61	68.0618	61.9379	115.487
AATK	-1.10719	0.680196	-2.81003	0.00147404	-2.53798	0.00415992	TRUE	TRUE	2.3023	2.54909	6.46955	1.56981	1.2047	3.41585	4.34867	5.9558	7.90647	0.350746	1.00011	4.84007	3.19811	1.33279	4.57707	1.05024	2.08129	7.35356	3.02322	3.17369	11.6838	1.25403	4.43569	3.84542	3.62359	1.20864	8.13419
SLC7A8	1.16472	0.681935	3.86328	0.0152299	3.31692	0.0380318	TRUE	TRUE	3.25427	2.79404	0.84236	1.04658	0.352215	0.640554	1.42977	1.34013	0.0001	1.26243	0.833443	2.45976	5.7965	9.23025	1.63473	3.15051	2.22995	0.474517	2.0785	0.881653	0.182657	4.86829	3.7834	0.329699	6.40161	3.70124	1.01686
PRRT2	1.54343	0.681957	-1.52724	0.069784	-2.35719	0.029461	FALSE	TRUE	2.2894	1.48332	3.49647	4.186	2.03866	4.26979	6.79102	4.0202	4.62229	1.33256	0.666774	4.36401	0.799604	1.086	1.30781	0.175123	0.594727	2.13497	2.26744	0.881653	2.64718	1.91787	1.36991	6.59208	0.845582	1.20864	2.03362
NEK3	1.0081	0.688571	-2.02542	0.00185536	-2.04183	0.00505241	TRUE	TRUE	21.0512	20.882	42.6375	39.5046	19.7371	52.1971	39.1372	34.5432	50.1143	12.4831	29.8338	47.0509	10.9933	13.4258	17.6541	8.40119	11.298	29.6511	32.8766	26.9756	53.6719	12.3919	17.8729	50.4287	12.6219	13.3695	40.3316
SATB2	1.20019	0.688654	-1.94714	0.0469055	-2.33693	0.0195064	FALSE	TRUE	4.2338	3.52761	8.24378	3.66277	2.85408	2.13495	7.02929	3.42463	3.64919	1.47282	2.16679	4.99876	2.19873	3.20844	6.53863	6.1259	5.79771	14.9442	6.61319	5.81835	13.9657	4.35197	2.60927	5.82301	2.41576	2.34164	13.8958
MVK	-1.20501	0.690042	2.12243	0.0419885	2.55755	0.0173819	TRUE	TRUE	57.2624	69.0019	26.9797	59.3876	32.098	16.9526	74.7598	21.5895	17.2725	60.8716	109.501	32.8484	16.9896	24.729	25.8273	105.539	144.046	21.586	32.6876	31.0308	19.8988	87.3312	104.499	36.0362	20.5332	84.5216	45.4157
GPRC5C	-1.09431	0.691387	-2.97706	0.0013069	-2.72048	0.000468071	TRUE	TRUE	40.4661	44.2826	120.47	21.1912	28.1695	64.4724	85.1254	21.1428	70.1844	30.1557	11.8336	60.46	46.1714	58.2438	243.887	23.4531	38.9481	142.799	38.167	144.575	184.474	43.5925	18.2643	58.7787	35.8727	33.0838	138.703
ME1	1.00326	0.69179	3.55481	0.0132272	3.54326	0.00511571	TRUE	TRUE	238.833	238.056	67.1857	144.938	127.948	24.0171	81.192	59.4082	20.4812	395.967	435.346	48.7963	236.25	90.1774	48.0582	665.087	499.191	42.4604	30.2313	91.8585	8.48901	323.297	408.661	208.852	33.6988	191.859	136.331
RPSAP58	-1.18989	0.692592	1.96961	0.0197314	2.34362	0.00782108	FALSE	TRUE	12.2763	14.6074	6.23285	5.23248	3.85871	2.40311	17.5929	11.6137	7.1227	13.6672	28.1089	5.28692	8.87368	8.18871	6.53863	12.8188	12.9795	2.34398	6.10418	9.18751	7.1385	22.1383	24.4045	8.40189	11.783	18.5178	10.6271
EXD3	-1.32622	0.692728	-2.26383	0.035006	-1.70698	0.0793064	TRUE	FALSE	7.6657	10.1664	17.3539	14.1275	11.657	26.7924	16.0838	36.7766	47.8032	3.71695	5.16683	18.9633	2.59849	6.02191	7.51941	3.8506	2.37861	5.45589	5.47951	7.58146	10.0408	7.37615	5.47936	10.9867	8.09257	6.26938	11.2692
ADAMTS10	1.22464	0.694345	-2.04316	0.000775364	-2.50214	0.00027842	TRUE	TRUE	11.3717	9.2857	23.2341	17.7902	8.22848	20.9216	15.9647	7.74251	20.6783	7.08317	6.16684	26.6596	4.59725	13.0803	20.5965	8.22617	10.4061	35.8186	22.1067	12.5182	21.268	10.2528	8.74082	11.2065	4.95221	7.40238	28.7236
SLC22A31	-1.36093	0.696157	2.82559	0.0634438	3.84541	0.0277036	FALSE	TRUE	3.42839	4.66579	1.21334	4.186	1.53829	0.854038	3.33599	1.9357	3.40592	7.01302	6.00017	1.11091	0.599728	0.54305	0.327026	6.1259	13.0819	0.0001	0.566936	1.93952	0.182657	5.23709	6.84916	1.53823	0.362449	5.43851	2.28781
FTH1P20	1.5889	0.696502	-1.5949	0.0860014	-2.53414	0.0386928	FALSE	TRUE	1.36616	0.85981	2.17888	1.30867	1.47028	0.855642	3.88584	1.19456	3.98434	1.12557	0.667545	0.874198	2.00311	0.445454	2.49254	0.175246	0.450169	0.95285	0.756121	0.531045	3.47668	0.221924	1.06796	2.4209	1.45278	1.05147	2.37391
PLCH2	1.0742	0.697287	-1.87201	0.0144869	-2.0109	0.0347022	FALSE	TRUE	159.282	148.28	298.177	552.29	351.217	392.181	123.907	203.838	613.794	96.2192	95.8347	483.057	39.3756	76.0638	166.405	50.0565	57.9761	166.996	244.687	183.189	125.237	83.3507	80.9509	214.903	84.3686	137.172	222.845
MINK1	-1.06171	0.698287	-2.14524	0.0250339	-2.02054	0.0574609	TRUE	FALSE	70.2053	74.538	150.607	107.263	64.957	161.502	181.272	188.797	453.327	35.7662	49.0006	119.016	18.1888	32.3796	54.2699	24.3283	25.8664	63.572	54.6053	87.9792	179.998	64.2457	56.684	81.4111	75.9733	90.6406	91.7621
OR10AD1	1.13434	0.700018	-1.87221	0.0161863	-2.12372	0.0381775	FALSE	TRUE	8.64293	7.61935	16.1814	8.37191	9.11803	15.798	35.8013	12.3582	38.3156	4.13773	8.33353	13.6472	2.39861	3.70203	7.19248	2.97549	2.52726	9.72564	7.36897	15.5154	11.1361	4.64701	4.56615	27.0272	3.44242	4.83424	6.60905
REEP1	1.13612	0.700701	-2.01251	0.025304	-2.28645	0.0104542	TRUE	TRUE	2.70239	2.37862	5.4386	1.83143	1.3715	3.84282	1.96589	1.78681	10.2176	3.29618	3.1668	6.50628	1.59911	1.38215	1.63473	1.05024	4.01383	4.74427	3.77901	1.23427	7.02855	3.02428	2.6745	2.41716	5.07299	3.39911	7.11743
RHCG	1.21436	0.703101	-2.85673	0.0246174	-3.46909	0.0102314	TRUE	TRUE	5.64298	4.6469	16.1205	6.54057	5.0409	15.5845	1.60847	6.25359	11.069	8.83639	0.666774	6.58563	10.7934	6.21934	36.6159	0.525168	6.68965	15.8931	1.13377	10.9314	2.09951	13.3507	0.391475	11.2065	2.35537	0.982036	29.9098
ABHD5	-1.07686	0.704772	2.04018	0.0282471	2.197	0.011906	TRUE	TRUE	79.055	85.1313	38.749	80.0555	65.6418	40.5622	31.3336	31.7142	30.0443	117.116	115.668	33.8799	62.5613	48.1745	34.3274	117.79	141.224	30.6	23.6183	39.1411	28.6616	141.989	129.284	47.3525	57.976	110.203	64.5644
DONSON	-1.40543	0.706746	-2.12929	0.0452622	-1.51505	0.0965501	TRUE	FALSE	7.95125	11.1749	16.9305	8.89514	7.59838	19.4272	9.17379	44.2212	44.2758	4.27799	5.8335	13.1712	3.99762	3.89947	5.88477	3.67558	3.56786	5.6931	18.5167	8.2867	10.8623	6.85982	7.30578	22.7424	8.21335	8.68645	13.3875
BMP2	1.08463	0.707114	2.02685	0.0467092	1.86871	0.0992534	TRUE	FALSE	12.9928	11.979	6.41032	9.15676	13.8438	2.98888	11.914	6.55137	3.40592	2.10398	1.50012	1.11091	25.5842	13.1296	13.731	12.0767	7.58159	10.6745	12.6594	24.8599	9.94947	15.0472	11.2195	3.40596	15.3999	17.1462	6.01594
FAM196B	1.40332	0.707597	-1.71285	0.0672995	-2.40368	0.0305651	FALSE	TRUE	1.26201	0.899304	2.16164	0.261719	0.611669	1.17426	0.595794	2.23349	0.608282	0.771522	0.500106	1.2696	3.19811	0.691127	1.96166	0.350145	0.44607	1.66056	2.45639	1.41059	3.55997	0.590184	0.84808	3.07636	1.87224	0.453301	3.98241
DNASE1L2	1.57819	0.707948	2.96109	0.0352974	1.87626	0.0767242	TRUE	FALSE	21.4012	13.5606	7.22745	68.0211	8.69178	10.1406	39.7924	25.3118	14.1099	7.4338	10.6669	5.31613	2.99824	2.91228	1.30781	6.47594	10.1087	2.13497	13.6042	15.1628	3.19485	23.8248	18.7862	9.66833	9.05882	16.8441	11.947
PRR4	1.04545	0.708646	-3.04697	0.0010541	-3.18547	0.00272709	TRUE	TRUE	2.74252	2.62328	8.35638	0.784975	2.52826	16.7672	1.04704	3.00884	4.23629	3.45821	1.53532	3.73759	5.19687	2.76421	14.051	0.875215	4.16248	4.98147	2.93348	3.61899	12.432	4.86721	2.0222	3.24478	2.77713	1.34594	7.4007
MVD	-1.12118	0.710481	2.24478	0.0981236	2.5168	0.0465658	FALSE	TRUE	102.433	114.846	45.6318	121.13	56.9688	45.4724	163.936	77.1267	49.6279	111.927	170.669	55.1442	29.182	25.9631	24.1927	156.821	132.751	24.6698	27.3972	30.3256	16.5216	188.238	266.267	74.27	20.8352	158.697	75.156
CEACAM6	-1.07326	0.713236	-5.48449	0.00114059	-5.11014	0.00044023	TRUE	TRUE	8.86842	9.51808	48.6387	12.0346	13.2137	55.0791	7.56542	6.84916	24.449	19.8467	2.00012	20.6295	13.3918	10.0693	88.2702	2.45042	6.24368	18.7396	0.944827	35.2622	94.656	12.5394	0.391475	17.4688	2.1742	2.11504	69.8177
PDGFRB	-1.06264	0.71865	-2.24787	0.0242033	-2.11537	0.0526307	TRUE	FALSE	11.0635	11.7565	24.8694	3.66277	10.5821	21.8823	26.6872	17.5694	17.2725	4.62863	5.8335	7.53776	8.41105	6.5155	15.0387	5.25078	28.9882	19.4512	13.2263	7.22884	79.6854	16.3749	9.32788	9.4486	10.2667	8.00665	28.6389
C10orf128	1.15538	0.7192	-2.25796	0.0100472	-2.60879	0.00420267	TRUE	TRUE	3.57876	3.09749	8.0807	2.87791	2.65023	4.05631	7.56541	3.72241	10.3392	1.40269	1.66679	2.14238	4.19749	2.91229	5.55785	1.5753	5.35174	10.9117	2.83428	1.41059	11.775	4.13069	2.60927	5.71315	4.04634	4.45658	14.15
TRERF1	1.27329	0.720312	-1.70358	0.0120214	-2.16915	0.00508641	FALSE	TRUE	67.4399	52.9651	114.889	17.2669	80.4147	87.1018	142.49	44.6679	159.952	67.0439	48.1672	170.192	48.5699	75.4696	115.732	50.4065	36.8669	121.688	143.032	76.8715	73.023	31.9384	26.7441	138.213	38.7715	34.5189	53.2106
ANKS6	1.20543	0.723564	-2.37471	0.000837442	-2.86254	0.000333691	TRUE	TRUE	5.82907	4.83569	13.8424	3.92438	6.74586	17.5058	10.0078	3.27574	9.60939	4.46596	1.83345	9.20398	1.79898	4.54114	17.9811	4.20065	4.90577	15.6559	12.2815	7.58146	20.0814	6.93359	4.8923	6.04298	3.01968	4.90978	14.6584
BCAP31	-1.01124	0.723588	4.24064	0.049327	4.28832	0.0229089	TRUE	TRUE	5.89434	5.9606	1.38996	6.80219	7.11653	2.13495	0.0596694	6.25359	0.608282	7.85458	1.50012	2.93582	5.7965	4.24498	1.30781	10.8515	9.51412	0.711725	2.26744	2.11583	0.0001	7.30239	9.91495	0.87903	6.22043	7.02471	2.542
MYH3	-1.08664	0.726168	-2.64912	0.00460057	-2.4379	0.0107191	TRUE	TRUE	1.50468	1.63505	3.98608	1.04658	1.93021	3.41585	3.39556	3.42463	11.5556	0.911781	0.833443	3.88794	0.799604	1.086	2.94244	0.525168	0.594727	2.13497	2.0785	1.41059	2.82974	1.77035	1.76129	1.64809	1.50989	2.0395	3.47403
ACOT9	-1.03934	0.727589	-2.036	0.000117913	-1.95893	0.000294324	TRUE	FALSE	14.9898	15.5796	30.5193	9.41838	14.8444	26.2587	21.7429	24.5674	28.7064	12.2727	14.8336	21.1055	15.9902	11.402	26.1542	9.2763	11.744	21.8233	13.2263	17.4549	44.3613	21.0218	17.0249	31.0922	16.9701	12.7653	44.6529
SULT1A3	1.42425	0.727906	-1.61841	0.0225545	-2.30502	0.0100924	FALSE	TRUE	26.2181	18.4083	42.4316	43.0353	24.4869	68.8109	77.7312	37.8189	76.0196	7.29355	11.1669	28.7706	6.19625	9.82074	20.0093	11.3766	12.0413	32.3328	31.3601	20.1799	48.5338	17.097	15.6854	37.947	15.6549	16.0667	27.029
FLT4	1.10885	0.730986	-2.18098	0.024433	-2.41837	0.0110892	TRUE	TRUE	7.95092	7.17046	17.3408	4.186	2.37225	8.11251	5.83791	4.46688	23.476	5.2598	2.33346	6.10957	11.1931	10.8098	26.4811	4.72571	8.02755	18.9768	24.752	20.8048	20.6291	5.23709	4.69661	4.60794	2.41576	3.85231	30.3334
UBE2QL1	-1.15761	0.732024	2.37714	0.0105536	2.7518	0.00461455	TRUE	TRUE	18.2783	21.1591	7.6892	7.58705	15.5858	5.12373	27.4616	21.8873	10.9474	20.3376	40.6672	6.82366	15.1907	7.84819	2.61551	13.8269	9.51412	4.03264	5.10162	6.52359	5.02043	39.3882	37.6374	20.7648	17.3325	29.6092	6.1854
ZNF276	-1.06267	0.735616	-2.05934	0.0255958	-1.93789	0.0528976	TRUE	FALSE	57.9444	61.5761	119.328	103.078	79.8007	248.384	74.1045	142.044	227.947	28.8934	47.8342	159.077	24.7847	33.1694	62.4431	19.0776	23.7852	56.4556	113.178	67.5272	42.7184	46.0265	38.5505	77.0164	54.4129	59.8976	80.5797
THADA	-1.05938	0.737214	-2.11159	0.0282402	-1.99323	0.057713	TRUE	FALSE	13.1733	13.9556	27.8166	4.97086	8.00609	11.208	13.9393	20.6962	58.1423	8.06497	10.3336	16.1862	7.19563	8.4405	8.17326	6.30092	5.5004	19.4512	20.7841	15.5154	22.3634	22.5708	21.8519	56.2516	21.5599	21.3005	30.7571
PCP4L1	-1.01645	0.737888	4.16725	0.000908206	4.23581	0.000380796	TRUE	TRUE	52.7783	53.6465	12.665	124.531	97.6101	6.72486	68.2071	18.7606	5.59538	67.745	118.668	17.1383	21.5867	26.654	11.1156	77.3601	55.449	11.1489	14.5489	28.3861	2.00823	36.9541	38.5506	28.016	11.2933	45.0936	19.5728
THEG	-1.07357	0.737916	3.58606	1.12939e-06	3.84987	4.88733e-07	TRUE	TRUE	5.56279	5.97203	1.55123	6.8022	4.48492	1.81472	5.89748	3.42463	1.58137	4.20786	5.16683	2.06304	3.39799	4.88665	0.653953	5.60083	5.5004	1.18614	3.59006	7.22884	1.36928	7.15487	9.00174	1.53823	7.85101	8.08219	2.20308
KANSL1L	1.18434	0.738851	-1.69323	0.0287276	-2.00536	0.0134867	FALSE	TRUE	48.8997	41.2886	82.7986	36.1035	34.2299	54.1183	124.559	56.1325	127.598	34.9946	51.1673	59.9844	37.177	22.9027	33.4261	16.9773	22.2986	44.1208	47.6142	51.659	147.597	43.2238	42.595	111.406	50.5483	49.3237	84.1381
NAB1	-1.09871	0.739026	-2.1024	0.000905061	-1.91351	0.00212073	TRUE	FALSE	85.9982	94.4871	180.802	83.975	75.426	162.663	124.674	179.118	270.882	85.7591	115.165	195.181	53.9644	55.2807	87.6164	39.5552	41.4753	117.654	123.189	108.784	228.263	90.9426	84.7269	217.086	85.9266	95.9205	167.073
RP11-292B8.1	1.09436	0.740554	-3.69076	0.00439925	-4.039	0.00192052	TRUE	TRUE	8.16364	7.45977	30.13	4.16615	5.22648	11.287	9.65759	13.9101	24.3118	11.441	8.13278	97.0392	4.29002	4.50506	11.2936	6.97235	4.74495	11.1981	5.95037	12.7288	49.3308	8.97311	5.34519	5.31758	13.8585	5.08479	31.2622
OR1L4	-1.00607	0.740749	-2.34242	0.0462252	-2.32827	0.09018	TRUE	FALSE	1.94261	1.95441	4.5504	2.79074	3.41006	10.8702	2.68072	4.16909	6.08192	2.45463	1.16678	8.15791	2.79836	1.97446	2.94244	1.75033	0.743383	3.32102	2.26744	2.46845	1.61153	0.0738605	1.17423	1.97769	0.724799	0.528834	1.44051
CDR2L	1.07511	0.743535	-2.03182	0.0225769	-2.18444	0.0460254	TRUE	TRUE	1.29162	1.20138	2.62433	1.04658	1.48269	4.37653	1.07235	1.19124	0.608282	0.561134	0.666774	2.06304	0.399852	1.086	1.96166	0.525168	1.0407	1.89777	2.26744	1.41059	4.38147	2.95052	1.82652	1.97769	1.50989	0.906502	3.72822
GJA3	-1.34907	0.744722	2.49761	0.0200337	3.36945	0.00939463	TRUE	TRUE	3.87887	5.23287	1.55303	1.04658	1.29737	1.49449	0.774503	2.53127	0.729919	1.96372	0.666774	1.19026	6.79588	16.0912	4.25014	6.47594	4.31114	3.79543	3.77901	6.17097	0.0913786	6.26974	6.26211	0.109966	3.92555	4.53211	0.762671
DIRAS3	-1.35373	0.75184	1.80175	0.0915159	2.43908	0.0484377	FALSE	TRUE	5.25861	7.11872	2.91861	3.92449	2.27958	1.28101	7.50585	6.99805	0.121736	6.87277	19.667	3.09451	3.39799	1.53023	1.96166	6.47594	8.62218	3.32102	3.77901	2.46845	2.46462	9.14643	11.1543	4.83422	0.966365	4.22998	6.27013
SERPINE2	1.25107	0.753056	2.48666	0.029874	1.98762	0.0582585	TRUE	FALSE	43.6697	34.9057	17.5616	4.44762	15.0484	10.6743	41.0434	11.6137	5.47374	42.9192	58.1674	18.0111	63.9604	36.822	24.1926	94.5124	62.2872	30.8372	35.8997	33.4991	17.343	44.1089	36.2023	20.7648	22.4658	25.6059	13.1957
DSG4	-1.07999	0.753955	3.47654	0.00111483	3.75463	0.000495419	TRUE	TRUE	10.6618	11.5146	3.06678	24.5923	13.084	12.5957	2.919	5.65802	0.608282	5.32993	3.00013	5.79219	25.5842	33.3176	2.61551	3.67558	10.5547	0.711725	5.47952	5.11311	0.365215	11.433	9.00174	0.659298	6.28082	12.3876	1.18632
GPR116	1.1891	0.755273	-1.85132	0.0489359	-2.20141	0.0249549	FALSE	TRUE	5.12194	4.30741	9.48238	1.04658	4.65211	3.62934	13.7011	6.25359	8.27138	2.3845	0.500106	4.91941	10.7934	3.85011	10.7887	3.32553	9.51413	7.82797	2.0785	4.05524	17.1605	5.53214	4.50092	5.38355	2.1138	1.1331	17.8782
KAT2A	-1.12309	0.75551	-2.06969	0.0162922	-1.84284	0.0327291	TRUE	FALSE	20.2566	22.7501	41.9249	9.15677	13.2508	22.9496	27.402	34.5432	112.271	6.66238	5.3335	30.8648	14.9908	15.104	32.0389	12.2517	13.0819	41.5116	32.3098	37.9069	24.0064	26.185	27.6572	33.2897	33.0946	35.1233	38.4675
HSD17B2	1.21989	0.755604	2.82037	0.011187	2.31199	0.0229027	TRUE	TRUE	5.43962	4.45911	1.92869	5.75572	3.7251	1.28101	11.2587	8.1892	1.21646	7.4338	10.0002	1.50763	3.39799	2.96165	0.0001	1.75033	1.93264	0.474517	3.59006	0.881653	0.273936	5.01582	3.97909	9.99793	5.31456	4.00338	0.677941
ALDH3B2	-1.20662	0.756983	1.92987	0.050396	2.32861	0.0258792	FALSE	TRUE	160.225	193.33	83.0239	212.436	112.178	123.928	249.122	163.337	127.233	166.104	360.674	102.979	53.167	37.1179	39.5581	185.348	260.599	38.9022	85.7816	66.4693	55.0414	249.521	290.733	89.8713	80.3199	255.531	86.678
RNA5-8SP2	1.73865	0.758166	-2.22031	0.0578157	-3.86033	0.0300719	FALSE	TRUE	2.03602	1.17104	4.52059	3.77489	1.10106	2.18624	0.845393	0.297885	2.01705	0.0702293	0.172941	1.41365	1.43421	1.83929	2.03109	0.611718	0.795727	1.97367	7.54822	1.68085	2.59434	1.04935	1.43967	19.5879	0.954126	2.04087	4.3608
ARL14	-1.07427	0.758897	2.69507	0.0810927	2.89524	0.0433398	FALSE	TRUE	2.44214	2.62352	0.906148	1.56981	1.3159	0.640554	1.13192	6.10469	1.94628	4.83902	1.50012	0.714194	0.199976	1.13536	0.653953	1.75033	2.52726	1.42335	2.64533	2.46845	0.0001	1.18027	1.63083	0.769164	6.22043	4.30551	1.10159
PMS2P4	-1.16863	0.760623	-2.03865	0.0300473	-1.74448	0.0573896	TRUE	FALSE	16.0021	18.7005	32.6227	17.035	17.1764	36.3992	35.6435	54.8116	89.5378	11.8066	12.5339	36.6085	10.2207	10.732	12.834	6.65096	7.74576	12.5721	13.8119	13.1087	22.6908	16.6597	14.8253	25.3115	16.1882	18.6704	25.0275
PRUNE2	-1.49177	0.763293	-3.59739	0.00133438	-2.41148	0.00286164	TRUE	TRUE	2.0504	3.05873	7.3761	3.13953	1.2603	4.69676	1.19149	13.1026	4.13574	2.59489	1.16678	5.79219	3.59787	2.36934	6.2117	1.40028	1.78398	10.4373	0.755881	1.5869	6.02449	1.54907	2.2179	2.30729	2.1742	0.982035	19.4033
LINC00202-1	1.06773	0.764684	-2.1688	0.0145488	-2.3157	0.00716207	TRUE	TRUE	4.45688	4.17415	9.66606	13.3427	13.4918	16.1182	6.67188	5.50912	14.4748	1.47282	1.16678	10.7115	0.399852	1.28344	6.86555	2.2754	0.594727	9.25122	4.72373	5.99466	6.11577	3.02428	1.50037	7.69074	3.74438	3.85231	6.10067
PLCB4	-1.05988	0.765797	-2.22688	0.00784679	-2.10106	0.00378993	TRUE	TRUE	11.3313	12.0099	25.2335	14.6508	9.32189	22.416	4.70609	36.6277	15.3263	11.5714	4.33348	13.4092	14.1913	8.63794	30.0773	6.82599	11.0007	32.0232	18.7057	15.8681	18.5297	15.0472	6.58825	17.4688	4.95221	3.70124	52.6175
ACP6	1.0844	0.767753	2.27784	0.0196423	2.10055	0.0377247	TRUE	TRUE	94.8904	87.5048	41.658	148.077	83.7668	38.5341	62.3097	18.0161	23.476	87.1007	81.001	69.1085	55.5658	50.0003	58.193	246.429	220.759	48.3906	59.7068	86.7453	35.69	68.2291	90.8635	29.1147	31.7054	68.886	30.7572
NPM1P27	-1.04166	0.767897	-2.01047	0.0119031	-1.93007	0.0234334	TRUE	FALSE	13.8496	14.4265	27.8441	28.7818	26.4838	40.8276	21.3029	20.3823	47.1932	8.56536	18.4663	43.7711	7.43013	6.89292	17.6009	6.40427	7.47998	12.8112	20.2123	16.2169	14.9473	8.64939	11.1296	31.3566	9.45038	8.36029	14.2453
FAT4	1.107	0.767937	-2.07678	0.0561897	-2.29899	0.0300025	FALSE	TRUE	5.00361	4.51999	10.3914	0.523338	1.39003	3.52259	6.85059	2.82906	6.69011	3.08579	1.33345	2.61844	5.99638	4.93601	9.48096	5.25078	10.4061	16.8419	5.10162	5.11311	17.4343	7.96623	6.97963	11.2065	5.25416	3.17251	15.3362
P2RX7	-1.06827	0.768071	-2.02915	0.00244265	-1.89948	0.00508468	TRUE	FALSE	49.2879	52.6526	100.013	51.539	38.8246	80.2703	45.9877	76.3817	239.37	49.5114	46.6673	136.393	35.1783	40.9685	60.8084	29.579	40.5833	64.5208	69.343	89.5659	71.1974	42.9287	40.5727	63.0634	70.2362	47.6568	84.4767
RXRG	1.29021	0.769153	-2.83991	0.00470319	-3.66408	0.0022628	TRUE	TRUE	1.76015	1.36424	4.99867	0.784957	0.426345	1.92146	5.36135	1.63792	4.25738	1.05204	0.666774	2.06304	1.19936	1.82639	5.23092	0.175123	3.4192	3.79543	1.32272	1.59148	13.2035	2.4342	0.587709	3.29815	1.75145	0.758079	6.21945
FDPSP7	-1.09896	0.775438	2.18708	0.0636625	2.40351	0.0350183	FALSE	TRUE	7.37136	8.10083	3.37041	5.7681	6.13892	1.48484	23.4454	5.38269	3.7581	4.63382	19.5487	2.46135	5.43333	1.28074	0.987719	6.9616	10.9786	1.89777	1.88955	3.88352	2.00832	8.57576	13.091	9.17003	2.26329	4.50246	5.19514
PBK	1.08916	0.780887	2.2684	0.0603699	2.0827	0.0336054	FALSE	TRUE	9.35041	8.585	4.12204	1.04658	4.31814	2.56191	2.38288	6.10469	4.9872	11.0805	5.16683	2.45976	13.7915	18.3123	3.26936	13.3018	7.13562	7.11635	12.6594	8.63932	1.82567	8.70384	10.2411	5.16382	11.8368	8.76199	5.59229
AMT	-1.11865	0.785989	-2.19809	0.0105024	-1.96496	0.0197091	TRUE	FALSE	13.5972	15.2105	29.8879	19.6215	22.1092	26.7924	19.8367	38.2655	74.0767	4.76889	4.50015	35.4668	5.19687	7.6014	20.2695	4.02562	4.60846	25.1442	28.3419	16.0444	16.1564	13.277	10.502	19.3366	13.709	18.0526	21.8605
ACER1	1.18777	0.786178	5.01182	0.00113277	4.21952	0.0022602	TRUE	TRUE	50.9382	42.8856	10.1636	97.0607	31.6534	15.371	38.7202	13.8471	6.44683	117.537	110.001	15.0754	17.5892	8.09499	7.19248	65.8086	57.8275	0.948933	8.88053	27.5046	7.39367	46.0266	56.1625	11.4262	15.8831	37.9934	17.4545
LIF	1.40317	0.787674	-8.04184	6.04088e-06	-11.2841	3.02082e-06	TRUE	TRUE	1.16431	0.829769	9.36319	0.523338	1.24177	3.52259	4.40824	1.19124	18.4888	0.280617	0.500106	8.01382	0.599728	0.937922	10.7887	0.175123	0.743383	2.60939	1.13377	0.176411	13.6006	1.10651	0.261017	11.8657	1.08715	1.5863	6.01594
KRT32	-1.41288	0.789804	1.63906	0.00587484	2.3158	0.00304216	FALSE	TRUE	3.59064	5.07316	2.19066	5.50087	1.09351	13.4496	3.03814	16.5272	0.121736	1.6832	1.66679	1.2696	3.99762	4.83729	0.327026	1.05024	1.63532	0.711725	2.45639	2.99738	0.273936	3.98317	4.50092	0.439565	7.01551	7.32685	0.932131
PTGIS	-1.06458	0.792769	-2.16903	0.015115	-2.03746	0.0273863	TRUE	TRUE	4.50064	4.79129	9.76205	0.784957	10.508	5.44396	10.9013	3.27574	11.7988	2.10398	1.50012	3.57057	2.19874	2.41869	6.53863	4.20065	10.4061	11.1489	7.74686	1.5869	17.7082	5.53213	4.63137	6.04275	2.53654	4.00337	15.8446
CTC-512J12.6	1.35515	0.794448	-1.6049	0.0816224	-2.17487	0.0481274	FALSE	TRUE	7.18905	5.305	11.5377	5.81957	4.37565	11.6569	28.2565	13.5256	23.659	3.43066	6.52951	10.173	3.83697	2.1258	2.68972	1.37144	2.09666	4.0171	5.99587	3.92715	10.8347	4.13226	5.37368	20.74	4.66913	4.48596	8.53101
SLC7A5	-1.05256	0.795338	2.78924	0.0054006	2.93584	0.00284126	TRUE	TRUE	89.2702	93.9624	32.0052	20.9501	41.1491	41.7244	97.3946	66.215	20.7468	84.7817	172.214	25.3378	46.3064	37.1472	19.9717	120.655	128.693	11.6315	33.3092	36.019	32.5543	162.433	136.419	46.6529	148.332	133.843	57.4223
MACROD2	1.16432	0.795474	-1.97801	0.0235587	-2.30305	0.0130214	FALSE	TRUE	41.2262	35.4078	81.546	78.2242	53.8737	82.7253	65.8243	67.0017	156.425	16.6909	32.0005	96.2441	23.5855	18.411	31.385	12.6017	10.852	42.9348	80.1129	50.4249	33.7733	26.9225	25.2438	143.045	25.8477	25.4549	65.8354
LAMA3	-1.09121	0.800331	-2.0292	0.00198706	-1.85959	0.00374677	TRUE	FALSE	44.4217	48.4734	90.1408	51.0159	77.9267	129.905	48.9515	39.7545	85.0235	44.2515	37.6672	165.508	33.3794	54.0969	90.8857	51.8069	36.7183	103.185	51.7712	74.0507	54.3108	34.5201	33.6584	41.6395	39.6772	33.9147	50.6686
GJA1	-1.08332	0.800663	2.09263	0.00015232	2.267	7.84225e-05	TRUE	TRUE	975.151	1056.4	465.992	760.788	681.121	536.7	585.032	523.357	231.839	1261.63	1515.52	633.956	1033.36	1505.35	633.583	1026.86	1097.68	553.407	943.971	779.293	260.874	1039.29	1203.81	395.629	1150.28	1145.09	481.945
ICA1	1.04086	0.800703	-1.99264	0.00456988	-2.07407	0.00843645	FALSE	TRUE	33.3964	32.0853	66.5469	81.6252	40.2707	74.9332	51.1107	47.0501	73.1036	24.2648	53.5007	93.1497	17.7891	17.1277	30.4042	13.4768	19.3255	32.7348	39.8676	33.8517	67.181	23.4559	22.8956	115.03	15.5811	22.6601	45.8391
RAB3IL1	1.18896	0.804559	-1.77323	0.0335543	-2.1083	0.0193614	FALSE	TRUE	3.42019	2.87662	6.06478	1.30819	2.79849	3.20237	2.56159	3.57352	4.74392	1.75333	0.833443	3.17385	5.7236	4.04754	4.904	1.75033	3.30087	11.6233	8.50264	3.87893	5.47682	3.46684	2.08744	3.95529	2.29498	2.49271	11.4387
GPT	1.22238	0.805069	3.22317	0.0159291	2.63679	0.00892819	TRUE	TRUE	50.2816	41.1341	15.6001	138.397	49.7277	8.96644	5.12307	20.9939	23.8408	45.7245	23.5003	26.5009	16.7897	23.5938	15.3656	97.6626	73.5852	19.4512	34.3881	34.7333	1.18672	41.1585	53.1622	8.89926	23.0093	49.7768	20.5895
DPP10-AS1	1.62915	0.807386	8.41547	0.00388694	5.16557	0.00211117	TRUE	TRUE	7.1031	4.36001	0.844052	3.13953	3.57684	1.06752	6.31446	1.9357	0.365009	7.08316	5.16683	1.03157	3.19811	2.1719	0.653953	32.3793	13.3792	0.237308	0.377991	2.64476	0.365215	3.9094	3.58771	0.659298	0.422841	2.41717	2.37254
ANTXR2	-1.00418	0.809119	-2.0295	0.00600337	-2.02106	0.0107155	TRUE	TRUE	12.4449	12.4968	25.2569	3.92438	15.8081	17.6126	25.9128	13.1026	17.759	10.7299	5.33349	14.282	12.5923	15.795	22.558	10.8515	19.9201	35.5813	16.6273	10.2261	50.6598	12.7607	12.9155	13.184	6.16003	6.87364	30.4182
H19	1.14006	0.812167	-5.79133	0.0012561	-6.60244	0.000680899	TRUE	TRUE	50.1992	44.0322	290.72	20.9296	109.712	67.6747	174.062	82.1888	1221.1	39.1322	10.6669	54.2712	56.3651	22.5572	198.444	13.8269	52.1786	164.623	22.8625	42.8436	411.658	58.7134	22.8956	117.667	15.7019	9.21519	90.3224
KLF8	-1.08034	0.812784	-2.01249	0.0225896	-1.86284	0.0379979	TRUE	FALSE	24.4666	26.4322	49.239	36.6267	20.4784	54.652	44.201	58.6638	110.083	18.3038	23.167	50.7804	10.1938	9.42768	15.6926	8.40119	9.36547	22.2977	15.1157	28.7387	52.3029	34.4462	26.4179	42.5184	28.4444	35.1987	45.585
SNCA	-1.02914	0.813143	-2.17911	0.00104617	-2.11741	0.00191322	TRUE	TRUE	19.6944	20.2683	42.9162	6.80219	31.2827	66.714	36.9332	15.336	37.5858	14.587	14.3336	41.3382	21.5867	9.97063	32.0389	12.0767	34.6371	18.2651	20.2172	19.3943	61.7045	21.9807	22.7651	41.2	23.3716	14.427	44.4834
CD164L2	-1.29712	0.813421	-2.37878	0.0418045	-1.83389	0.0680899	TRUE	FALSE	2.17936	2.82689	5.18419	3.13953	1.72361	6.08441	3.03814	8.93365	11.7988	0.350746	1.00011	3.49122	1.39923	1.33279	0.980879	1.40028	0.44607	2.8466	1.70061	3.70262	4.56403	3.02428	2.15266	7.47101	3.38203	3.32357	4.23661
CTNND2	1.68057	0.816455	2.92783	0.0215909	1.74216	0.0360219	TRUE	FALSE	24.2667	14.4395	8.28828	6.01734	9.82227	13.7699	117.77	35.5854	9.60938	8.1351	10.5002	19.0426	9.19439	12.6854	3.26936	12.0767	7.13562	16.1303	13.982	17.8075	0.821608	15.121	11.4805	2.30729	11.8368	10.4993	1.35578
AC159540.1	1.04659	0.816933	-2.29807	0.0447607	-2.40514	0.0271413	TRUE	TRUE	22.4114	21.4137	51.5029	25.3674	18.4885	38.0981	57.5948	63.256	168.189	13.7777	19.8234	46.3796	7.98179	11.4953	17.981	9.97639	5.20308	25.3793	28.1529	17.8075	11.9949	22.0248	18.7843	62.1504	14.4151	16.4516	41.8512
LIMS2	-1.12174	0.817939	-2.09978	0.00365841	-1.87189	0.00643749	TRUE	FALSE	6.57262	7.37279	13.8011	5.23248	8.30261	10.3541	6.67188	12.656	14.7181	6.17148	3.00013	8.17251	5.59663	4.68921	13.4041	3.32553	11.5953	16.8419	10.0142	8.99195	15.9739	8.26128	4.76184	6.37235	7.30748	4.98531	24.5717
PHYKPL	1.13527	0.821194	-2.11444	0.00928421	-2.40046	0.0157685	TRUE	TRUE	15.3907	13.5568	32.5427	15.9589	13.5472	12.9159	45.0942	20.1006	66.4136	6.452	15.8336	25.7075	6.79588	7.65076	15.6926	3.15051	5.05443	16.3675	18.1389	12.6945	29.8482	14.9735	17.9381	60.0973	12.5615	15.6355	33.299
RIC3	-1.00539	0.822501	-2.15768	0.00403841	-2.14612	0.00698969	TRUE	TRUE	37.9948	38.1995	81.9804	93.9213	57.3939	109.196	16.1434	47.9435	121.392	27.1402	38.0004	132.743	23.7854	37.8583	65.0583	32.9043	16.6497	60.7252	56.4947	62.4141	23.1848	26.9964	19.5036	74.4892	26.5724	25.8326	69.0547
PNPLA5	-1.04957	0.826286	2.93556	0.0394707	3.08107	0.0244387	TRUE	TRUE	9.19703	9.65293	3.13298	26.162	5.63394	1.06752	3.75297	4.31798	5.83865	11.7818	12.5002	3.96729	2.19873	0.789845	0.0001	13.4768	25.2717	0.948933	0.377991	2.64476	0.0001	14.6784	16.6988	4.17502	1.14754	9.36625	9.06622
PLAT	1.04914	0.827996	-1.93968	0.0219749	-2.03501	0.0133588	FALSE	TRUE	6.25356	5.96062	12.1299	2.61629	4.24402	6.08441	4.70609	4.61577	5.96029	4.48837	4.16681	5.47482	12.3924	5.08408	16.0195	4.72571	14.5684	15.6558	7.55791	3.35	24.4628	9.07263	7.50146	8.1302	4.46907	4.15444	15.2515
PDE2A	-1.30066	0.829359	-2.16987	0.0138226	-1.66829	0.022622	TRUE	FALSE	10.3642	13.4802	22.4888	5.4941	12.7133	14.517	14.8329	7.44473	18.3672	14.026	2.6668	13.2505	14.9908	10.9085	38.9043	12.7768	41.178	23.2465	9.82526	18.689	29.5743	5.53214	6.9144	10.1078	5.43534	7.32685	31.9432
PDGFRA	-1.07558	0.829379	-2.14414	0.03603	-1.99348	0.056714	TRUE	FALSE	17.2443	18.5476	36.9742	2.61629	16.3161	23.9103	25.0788	10.8692	17.0292	11.6416	4.33348	15.3928	17.3893	13.179	29.0965	10.8515	45.6376	41.0371	32.8765	18.8653	111.267	23.3084	27.3965	18.2379	14.1921	11.7833	39.8232
ACKR3	1.44743	0.830464	-2.33147	0.0188411	-3.37465	0.011478	TRUE	TRUE	1.88092	1.29949	4.38532	1.04658	1.42709	1.06752	7.8037	2.53127	12.8936	0.420876	0.666774	2.14238	0.99948	0.691127	2.94244	0.175123	0.148757	2.37218	1.13377	1.05796	4.01636	2.13915	1.30468	4.39475	1.32871	2.56824	5.25337
RP11-3N2.13	-1.14029	0.831935	-2.0287	0.00678527	-1.77912	0.011262	TRUE	FALSE	15.5158	17.6924	31.4769	12.0346	10.8579	28.7138	26.0915	32.1566	42.5608	17.4623	6.00017	52.109	10.7324	12.4089	31.385	10.2964	12.6108	37.2418	24.374	32.5909	23.9717	16.0691	25.5614	14.1583	7.06591	9.35287	21.6748
C6orf163	-1.02842	0.832226	-2.17984	0.0319995	-2.11961	0.0502636	TRUE	FALSE	1.78377	1.83445	3.88833	3.66277	2.16839	4.16305	2.50202	2.53127	2.18956	1.40269	2.16679	9.12463	1.59911	2.27062	1.96166	0.700191	2.67592	3.55822	2.64533	0.352721	1.09544	0.368902	0.84808	3.84542	1.38911	1.66184	5.16864
PHLDB2	-1.00588	0.832958	-2.34792	0.000532372	-2.3342	0.00091914	TRUE	TRUE	15.727	15.8195	36.9258	20.9296	29.6334	45.0454	25.2576	27.843	46.4653	11.6416	14.1669	41.4969	6.19626	10.5136	15.3656	7.35106	13.5279	32.4977	29.8535	11.284	25.0105	9.36769	8.93651	43.1776	15.2188	10.6503	46.3475
RP5-867C24.1	1.07629	0.833675	-2.43817	0.0194114	-2.62417	0.0119522	TRUE	TRUE	6.22443	5.78324	15.1762	11.773	11.5172	27.6425	16.8714	9.08255	35.3933	2.8546	10.5002	13.4816	1.4006	2.35997	5.23092	1.75888	0.44607	7.59726	6.97731	4.4007	8.84991	4.35197	3.65294	11.5191	3.8077	4.3063	11.6953
ADTRP	1.27686	0.833916	3.16748	0.00783496	2.48068	0.0128766	TRUE	TRUE	116.414	91.172	36.7528	141.798	71.124	23.0564	31.2146	47.4969	27.8549	178.2	172.334	81.9633	67.958	65.3018	27.135	315.046	166.346	40.5627	57.4396	39.3175	1.91695	112.116	115.262	43.0678	27.5387	52.1936	48.4655
TSTD3	1.10249	0.834584	-1.9687	0.0365863	-2.17047	0.0231236	FALSE	TRUE	7.20925	6.53906	14.1928	7.84867	5.96753	4.48327	3.93168	4.61577	20.1918	3.78708	5.33349	7.53776	8.59476	12.5373	12.4233	8.22617	6.24368	16.3675	15.3047	7.75777	4.56403	5.75342	6.4578	29.3344	4.22751	3.39911	18.6407
NUP62CL	1.16628	0.835015	-2.07966	0.00303835	-2.42547	0.00179781	TRUE	TRUE	3.51508	3.01391	7.31016	1.04658	2.90968	5.23047	6.61231	2.68017	7.6632	4.34812	3.00013	8.80725	4.59725	4.04754	2.94244	1.5753	1.63532	6.40472	2.26744	4.76049	11.5012	4.35197	2.28312	8.89927	3.32164	2.79484	7.0327
SLC25A27	1.05139	0.837443	-1.91992	0.00689358	-2.01858	0.00417494	FALSE	TRUE	8.8712	8.43763	17.032	14.1275	8.65472	15.5845	5.00393	6.99805	9.36611	15.7792	6.00017	27.453	3.99762	15.104	24.5196	9.10128	5.94636	19.9256	12.0926	15.3391	12.7791	4.64701	6.58825	14.1729	6.22043	2.87037	12.4554
VWF	-1.15325	0.837858	-2.8261	0.000516079	-2.45057	0.000876926	TRUE	TRUE	3.06873	3.539	8.67255	2.09305	2.83555	8.53948	5.18264	6.84916	8.63629	2.24424	2.00012	4.76072	4.19749	3.80075	10.1348	2.80046	6.98696	7.11635	2.45639	0.881653	7.94134	1.10651	2.08744	6.15261	4.46907	2.87037	16.0988
SLCO4C1	-1.06893	0.841277	4.89615	0.00155949	5.23364	0.000933455	TRUE	TRUE	22.2296	23.7618	4.54021	20.1448	16.4754	1.49449	7.62499	2.97795	3.89247	30.0856	26.3337	5.15744	14.7909	9.72384	3.92322	69.8342	74.3284	3.32102	4.1569	13.2234	1.00417	24.1935	28.3748	7.36114	7.00552	18.6569	10.1677
DDX11-AS1	-1.04463	0.842122	-2.00796	0.0191608	-1.92217	0.029897	TRUE	FALSE	3.37895	3.52976	6.7848	4.186	4.29961	5.65744	6.55274	4.91355	14.8398	2.66501	4.00015	9.91807	2.19873	3.55395	2.61551	1.22526	0.89204	6.16752	4.72373	4.58418	5.02043	3.24556	3.65294	5.82301	2.23459	2.34164	4.23661
LINC00672	1.01139	0.843575	-2.27921	0.0104233	-2.30516	0.0165134	TRUE	TRUE	5.52049	5.45834	12.5823	10.9881	8.45087	24.1238	5.18264	6.70026	14.2316	5.89096	4.16681	26.5009	1.39923	4.3437	9.15404	6.1259	3.86517	7.82797	5.66846	8.46301	5.02043	3.83564	3.52248	4.39475	5.07299	4.15444	9.40514
PARK2	-1.1379	0.843704	-2.05607	0.00649325	-1.80691	0.0104123	TRUE	FALSE	7.38361	8.40177	15.1812	9.94162	7.33889	17.1856	12.3906	22.6318	25.7871	3.3663	6.83351	13.4092	5.7965	3.60331	8.82711	2.80046	2.67592	9.25123	11.3368	6.6999	18.3471	5.82718	6.32734	11.8657	7.60944	11.1035	16.7767
MAGI3	1.28697	0.844398	-1.6788	0.0261198	-2.16056	0.0167709	FALSE	TRUE	4.58761	3.56467	7.70169	2.09305	2.31665	7.89903	16.7987	8.04029	13.0152	2.66501	2.16679	4.76072	3.39799	2.76421	5.23092	1.05024	0.89204	5.21868	1.70061	3.70262	13.5094	4.64701	4.63137	3.84542	4.34829	4.00337	8.13419
OSBPL10	1.0966	0.846332	-2.03884	0.00649126	-2.23578	0.00403822	TRUE	TRUE	13.445	12.2607	27.4122	20.1448	11.2678	33.9441	31.1548	30.3741	57.4127	8.34549	11.6669	17.7731	10.1938	9.18087	16.0195	5.60083	6.98696	11.6233	6.2353	12.3418	34.8686	13.867	7.95806	21.6438	12.018	8.30879	26.0122
AQP1	-1.23201	0.858135	-2.57316	0.0383577	-2.08858	0.0558305	TRUE	FALSE	140.221	172.754	360.812	29.0398	132.328	136.737	233.393	95.8869	156.668	79.1761	38.8339	68.3944	203.474	160.218	613.968	183.949	573.053	459.947	128.483	200.642	865.38	152.17	92.169	168.755	112.087	88.903	416.646
CXCR2	-1.02324	0.860246	2.04473	0.0282282	2.09225	0.0190308	TRUE	TRUE	3.2222	3.2971	1.57586	3.13953	3.03941	0.96078	0.774503	1.48903	1.09483	4.20786	1.16678	0.63485	1.19936	3.2578	1.30781	3.67558	6.24368	3.79543	2.45639	2.64476	0.365215	3.98317	2.87019	3.51582	6.34122	5.66512	0.932131
DGKG	-1.19363	0.860928	-3.09797	0.00132267	-2.59541	0.0020653	TRUE	TRUE	4.82165	5.75528	14.9373	4.70924	4.57761	17.1856	8.45895	13.2515	7.54156	3.71695	4.16681	10.5528	6.99576	6.2687	33.0196	2.80046	4.90577	12.5721	6.61318	9.52087	13.8744	3.46684	2.21789	5.60328	1.81185	1.1331	19.1491
TENM1	-1.01623	0.863709	-3.30601	0.00715245	-3.25322	0.0107743	TRUE	TRUE	5.08961	5.1722	16.8263	9.68	2.63038	15.371	0.417086	6.25359	16.2994	5.2598	6.16684	40.5447	7.59539	9.5264	20.9234	4.20065	4.75711	21.5861	7.9358	9.34456	3.55997	2.72924	1.5656	3.95529	2.89889	1.1331	12.3707
HSD11B2	1.17348	0.865194	-2.31725	0.00946365	-2.71924	0.00629363	TRUE	TRUE	23.2596	19.8212	53.8984	46.5683	34.7662	120.086	51.4683	33.7988	42.3295	16.9013	6.16683	31.1821	13.1919	11.1059	45.116	3.67558	26.6097	46.9675	5.29057	32.265	45.2744	33.3397	6.00119	18.1281	15.6415	7.85559	82.1036
RUNX1	-1.21105	0.86856	-2.95067	0.00391539	-2.43646	0.00587855	TRUE	TRUE	2.63737	3.19398	7.78201	8.37191	4.59612	10.0339	0.655364	10.2737	11.3123	3.92734	1.66679	7.45841	1.19936	1.43151	3.92322	1.22526	1.78398	6.16752	0.755881	4.58418	6.02449	2.72924	0.913309	3.18622	2.23459	0.302234	14.15
COX6B2	-1.12873	0.869045	-3.40294	0.00107766	-3.01484	0.00164274	TRUE	TRUE	4.42823	4.99828	15.069	4.44762	8.76593	5.65744	4.05082	4.0202	33.9367	3.92734	1.16678	26.4217	1.39923	4.63985	14.0579	4.20065	2.37861	9.96285	4.53479	6.17097	5.75066	7.00735	6.19688	17.1392	5.85808	6.64705	7.62581
FAM25C	1.31409	0.873789	-1.62277	0.0224893	-2.13246	0.0156668	FALSE	TRUE	9.40765	7.15907	15.2664	13.5603	6.7919	12.4869	25.0131	8.59086	23.5519	2.40045	3.91185	8.30181	6.25495	4.48555	8.31256	1.80441	6.62495	13.9184	8.22615	7.15868	16.7878	9.61038	6.63421	24.6041	8.39143	13.0746	14.1679
MIR143HG	1.30496	0.87462	-1.84674	0.00960012	-2.40992	0.00657445	FALSE	TRUE	16.1927	12.4086	29.9036	77.9625	19.6074	30.2081	6.49318	33.2032	35.518	4.27799	2.50013	23.3272	8.79464	10.9085	31.385	6.12589	5.64905	49.1023	12.8484	18.3364	10.5884	8.63008	5.74027	17.0294	4.40869	3.32358	42.0707
RAPGEF4	1.13097	0.876095	-1.8428	0.0068523	-2.08414	0.00468521	FALSE	TRUE	29.6999	26.2607	54.7311	60.4341	16.7162	70.7704	8.87595	40.7967	74.9282	22.7921	12.6669	51.4148	10.1938	21.2245	38.5774	14.877	16.6496	43.6464	69.7209	68.5849	28.9354	24.1935	16.8292	60.097	26.512	16.6175	69.4788
SLC9A3R2	1.09695	0.879346	-2.07006	0.026608	-2.27075	0.0370569	TRUE	TRUE	21.3705	19.4818	44.2382	9.15676	15.697	22.7362	60.8801	25.6096	31.6256	5.89122	4.00015	11.3463	21.9865	16.5847	34.9812	8.05115	25.2717	37.479	17.3831	25.2125	116.563	29.7993	22.178	30.543	17.8156	21.3005	68.6315
RP11-206F17.2	1.18977	0.880869	-1.80406	0.0305755	-2.1464	0.04223	FALSE	TRUE	4.17566	3.50965	7.53313	7.10207	4.33667	8.25544	14.416	8.35635	8.52649	1.84436	5.35619	5.49512	1.20687	1.58571	3.6117	0.700191	1.04453	2.37676	2.26744	2.46845	6.51362	2.58964	2.35367	18.7685	3.2787	2.57565	6.71737
ACTG2	-1.12541	0.882307	-6.14578	0.0562284	-5.46094	0.0412593	FALSE	TRUE	9.3802	10.5565	57.6486	2.35485	7.06096	35.7588	7.68457	30.8208	0.729919	8.97666	9.66687	11.2669	30.781	6.81166	42.5006	9.2763	12.6363	70.9254	2.26744	16.0444	134.087	11.9493	1.10902	6.37234	1.75145	0.302234	159.548
EGR3	-1.09738	0.882378	2.37379	0.00209095	2.60495	0.00143584	TRUE	TRUE	37.7986	41.4794	15.9233	47.0915	23.073	27.8598	18.7644	33.6498	6.93338	47.1973	86.0008	19.9948	35.7779	25.7161	16.6734	50.5815	54.1112	9.96285	20.2173	17.1022	2.00823	55.0994	50.4871	14.7222	27.6594	41.6948	29.2319
RP11-161H23.10	1.43624	0.88592	-2.06586	0.00408988	-2.96707	0.00286221	TRUE	TRUE	51.9015	36.1372	107.222	48.9228	44.3296	82.4051	176.147	46.0079	120.055	19.0753	55.1674	113.224	22.3862	25.963	57.8661	12.7768	10.5547	71.1626	98.2123	56.0669	75.2137	18.3665	24.722	272.688	19.3254	26.2858	65.1575
SLC25A35	1.33402	0.88762	3.69745	0.0434442	2.77166	0.0320756	TRUE	TRUE	51.5708	38.6582	13.9477	122.176	58.6102	17.2924	99.8319	17.4205	24.3274	47.8287	74.9711	14.996	16.7897	9.92127	12.7502	84.886	57.8274	11.1489	5.10162	26.4467	6.75472	30.0945	35.8762	12.1953	5.85808	28.1921	12.1165
RP4-717I23.3	1.12332	0.889005	-2.169	0.00351715	-2.43649	0.00248104	TRUE	TRUE	2.65381	2.36246	5.75612	2.61629	2.39078	4.48328	7.8037	2.68017	7.29829	1.1923	2.16679	6.03022	1.59911	1.57959	2.61551	1.40028	1.18935	3.55822	3.02322	4.58418	5.93321	1.84411	3.32679	10.8769	1.75145	0.982035	5.25337
ZDBF2	1.14358	0.889478	-1.77379	0.0369865	-2.02847	0.0273209	FALSE	TRUE	2.71713	2.37598	4.81961	3.40115	3.3174	4.69676	4.22953	3.72241	11.069	3.36631	2.50013	4.99876	3.79774	2.51741	5.19684	2.2754	1.18935	4.74427	3.02322	2.46845	2.64718	0.737705	1.63083	2.74676	0.905973	1.66184	2.45727
RAB26	-1.12104	0.890833	-2.13301	0.00439062	-1.90271	0.00614342	TRUE	FALSE	2.87325	3.22102	6.12868	4.186	3.1506	8.64622	3.09771	7.74251	9.36611	1.61307	1.66679	7.22038	2.19873	3.45523	5.23092	2.62544	1.18935	4.03264	1.32272	2.11583	3.8338	3.83564	2.21789	4.17502	4.10673	4.22998	6.52432
CTC-338M12.6	1.05943	0.891266	-2.47703	0.0100438	-2.62424	0.0138434	TRUE	TRUE	5.84213	5.51441	14.4711	7.30661	4.98936	19.7187	8.60201	7.27544	33.8808	2.94133	1.66679	7.9224	0.799604	4.04427	7.19248	1.5753	1.63532	5.21868	6.99108	8.99194	9.3954	7.87387	5.93022	19.4352	10.6472	9.58191	13.0053
LRP2BP	1.09679	0.893525	-2.05401	0.00858101	-2.25282	0.00621567	TRUE	TRUE	2.25743	2.05821	4.63678	1.83143	2.98381	7.47206	5.6592	3.87131	5.71702	1.96372	0.666774	5.39548	1.19936	1.03664	1.96166	0.700191	1.33801	3.79543	2.83428	2.64476	5.5681	1.03275	2.41358	3.62569	2.8385	1.51077	3.55877
RNA5-8SP6	1.68989	0.896145	-1.61754	0.0456392	-2.73347	0.0345445	FALSE	TRUE	26.6599	15.7761	43.1235	49.0723	11.7603	24.3928	12.4984	9.9759	25.7163	0.841652	9.1607	21.1202	14.9558	20.718	36.2195	17.9409	10.5024	35.031	85.413	26.7054	32.0917	14.3668	13.3676	124.447	18.1902	24.0184	45.9691
SH3BP2	1.15042	0.898555	-2.26654	0.00366091	-2.60747	0.00266323	TRUE	TRUE	7.55867	6.57036	17.132	14.1275	5.41154	15.0507	9.3525	6.55137	19.7052	3.22605	9.33354	13.2505	2.73814	3.40588	6.2117	2.10037	3.12189	9.48843	12.4705	13.2234	31.9477	8.48255	6.00119	22.0832	7.97178	5.51405	19.3185
MAFK	1.27864	0.898989	-1.57076	0.0307984	-2.00844	0.0232558	FALSE	TRUE	32.2144	25.1942	50.601	19.3599	19.4405	35.3318	87.5076	47.0501	99.1338	5.68057	9.33354	37.0536	14.9908	16.1287	24.1926	12.6017	17.8389	43.172	57.8174	35.0859	55.1324	28.9142	26.6136	63.1732	30.843	30.0625	47.6184
EGR1	-1.22505	0.899181	3.01349	0.0065474	3.69167	0.0088788	TRUE	TRUE	9.57612	11.7312	3.17774	4.70924	4.72586	3.94956	9.29293	36.4788	5.71701	3.50656	3.33347	2.30107	18.3887	6.31806	0.327026	8.40119	9.81144	1.18614	3.77901	2.29214	4.10764	10.4741	5.28367	1.64809	18.0572	25.606	6.1854
SELE	1.00044	0.899571	-2.38523	0.0354467	-2.38627	0.0463742	TRUE	TRUE	2.60744	2.6063	6.21935	0.261719	0.834057	1.17426	2.62116	2.68017	4.62229	3.29618	1.50012	2.14238	3.19811	6.81165	4.904	1.5753	1.63532	7.59077	1.88955	1.05796	8.30646	1.91787	2.47881	15.9307	6.09965	3.85231	5.08391
UGT1A6	1.0333	0.905221	4.00734	3.04625e-05	3.87821	4.16298e-05	TRUE	TRUE	9.25992	8.96154	2.31074	6.80224	7.12148	2.66639	4.22794	7.44499	1.90797	13.7424	8.32602	4.75845	4.88435	6.52442	0.983926	9.9764	5.33521	1.66098	5.97409	6.52359	0.547772	9.51197	6.45642	0.87903	18.96	23.9602	5.0814
UGT2A1	1.01576	0.905612	3.69864	0.0225118	3.64124	0.0292931	TRUE	TRUE	16.2844	16.0317	4.40282	1.56981	1.55682	0.0001	5.71877	3.12684	2.55447	14.2944	24.0004	2.30107	24.9254	18.2136	1.30781	24.6655	18.7308	3.79543	12.0926	5.81835	1.00417	17.4773	21.2597	16.0406	29.5316	35.5473	8.21892
ITGA9	-1.04029	0.905778	-2.21779	0.0014525	-2.13189	0.0019624	TRUE	TRUE	13.5021	14.0462	29.9449	12.0346	11.0763	17.0789	33.9547	20.3984	33.2397	11.361	5.8335	22.2163	9.19439	8.58858	22.8849	8.57621	20.3661	30.6	12.6594	26.623	56.5929	11.3592	9.5888	16.6998	8.87766	9.89499	40.2469
TNXB	-1.14222	0.905884	-2.59013	0.00692354	-2.26763	0.00519343	TRUE	TRUE	7.32151	8.36274	18.9637	2.47766	5.1848	15.0908	15.5955	18.0529	25.1981	3.07171	0.986579	7.97221	4.02239	2.62942	11.9972	6.21566	19.8578	18.8136	8.27575	5.64204	30.9682	12.2152	7.4091	11.815	6.69818	7.13932	29.8543
WDR91	1.01762	0.908626	-2.08924	0.0353829	-2.12606	0.0451931	TRUE	TRUE	2.06084	2.02515	4.30559	4.70924	1.90894	5.76418	2.97857	3.12684	12.6503	1.05204	2.16679	4.20532	1.19936	1.28344	1.96166	1.5753	0.743383	1.89777	1.32272	2.29214	2.00823	1.47531	2.41358	3.07636	2.1742	2.2661	2.88092
ZNF439	-1.15158	0.909486	-2.29373	0.00597696	-1.99181	0.00452534	TRUE	FALSE	3.94791	4.54633	9.05542	4.79277	2.81434	5.93757	6.14793	10.0449	19.0253	3.23467	1.17924	7.32904	3.01384	2.31395	7.51913	2.27663	2.3821	5.40664	3.22653	3.95303	7.09532	4.3869	5.54866	12.8734	4.50399	8.13441	7.25698
NOTUM	-1.51369	0.910449	-7.06533	0.000386242	-4.66761	0.000287893	TRUE	TRUE	2.78026	4.20847	19.6435	3.66277	2.90968	3.52259	2.74029	7.44473	25.4221	1.89359	0.500106	9.60069	3.99762	4.59049	46.7506	1.05024	1.78398	37.479	2.83428	14.4576	8.94541	4.13069	0.84808	6.70194	1.93263	1.1331	18.7255
NEB	1.08504	0.910585	-2.21019	0.0163377	-2.39815	0.0210992	TRUE	TRUE	6.56156	6.04729	14.5023	20.9296	8.13583	20.3879	5.77834	11.9115	33.9367	4.5585	5.66683	11.4256	2.99824	1.48087	8.50019	0.875214	1.63532	4.03264	8.88053	5.28942	8.58029	4.42573	4.89229	16.6998	4.04634	9.36625	12.4554
ATAD3C	1.16039	0.912859	-1.96222	0.0304224	-2.27694	0.0385542	FALSE	TRUE	1.44245	1.24308	2.83042	4.186	1.16764	4.48327	3.60998	4.16909	3.67407	0.771522	1.16678	5.43704	0.199976	0.888563	0.653953	0.350145	0.297413	2.8466	1.13377	0.881653	1.91695	0.442663	0.391475	1.42836	0.845582	0.982035	2.20308
TSPAN15	1.03286	0.913474	-2.08656	0.00131404	-2.15512	0.000994389	TRUE	TRUE	11.225	10.8679	23.4217	18.575	24.1847	22.416	22.1599	7.59362	24.449	8.626	5.00016	25.9455	10.5935	7.05844	15.3656	4.37567	15.3117	26.3302	9.25842	9.34456	34.2295	9.81024	9.91494	12.9643	6.4016	8.53539	25.6733
RP4-655L22.4	1.04108	0.915244	2.06963	0.0263275	1.98796	0.0332512	TRUE	FALSE	1.92815	1.85207	0.931643	1.62289	1.62662	0.88325	0.510795	0.763399	0.403194	2.59974	1.78114	1.37268	2.92068	1.91475	0.700277	3.17518	4.3709	1.49859	1.70061	1.43101	1.27797	1.59139	1.77419	0.352246	1.30395	1.15453	0.964939
HOXD9	-1.00026	0.916073	-3.47374	0.0236397	-3.47284	0.0298527	TRUE	TRUE	2.50667	2.50731	8.7075	0.261719	0.519007	0.854038	4.94436	1.34013	25.9087	0.701393	0.833443	2.22172	1.99886	1.97446	4.25014	1.05024	2.82458	3.55822	4.91268	8.11039	14.5134	4.13069	2.87019	6.15261	2.05341	1.5863	12.2012
LINC00888	1.09492	0.916228	-2.04531	0.0151102	-2.23945	0.0118272	TRUE	TRUE	0.981363	0.896289	2.0072	0.261719	0.834057	3.30911	2.08503	1.9357	1.3381	0.98191	1.16678	1.82501	1.79898	1.28344	1.30781	0.525168	0.44607	1.42335	0.755881	0.529032	3.10357	0.958986	0.521934	1.20863	0.483232	0.453301	2.542
CPXM2	-1.13615	0.917784	-2.18933	0.00165991	-1.92697	0.00127558	TRUE	FALSE	4.3943	4.99259	9.62057	3.92438	2.50197	6.61812	1.78718	4.76466	9.0012	5.32993	2.16679	8.48988	3.39799	2.86293	9.80789	4.90074	12.4873	10.4373	5.10162	3.87893	12.0489	5.45838	8.93651	10.9867	5.25417	2.34164	9.57461
ARHGAP44	1.00922	0.918499	-2.2726	0.0150186	-2.29356	0.0118336	TRUE	TRUE	2.42025	2.39813	5.50026	1.83143	2.79849	1.81472	0.893642	2.82906	3.16265	3.08579	0.833443	3.8086	2.79836	2.76421	10.4617	2.45042	3.4192	10.2001	3.02322	2.99738	5.84193	2.803	1.95698	2.52702	2.47615	1.5863	6.1854
ANKRD18B	-1.03009	0.919837	-3.55642	4.14349e-05	-3.45255	5.39682e-05	TRUE	TRUE	18.6655	19.2271	66.3824	15.4356	12.6207	88.1692	5.48049	24.7163	87.7	23.0265	17.0003	110.075	29.7816	29.2207	82.0586	14.1769	7.13562	28.4651	26.4524	32.2649	27.475	14.0146	11.2195	47.6082	20.956	19.6388	59.5082
PRKAG2-AS1	-1.02762	0.922134	-2.04318	0.0089791	-1.98827	0.0113183	TRUE	FALSE	3.112	3.19794	6.35838	1.56981	2.61317	6.8316	3.03814	3.97415	2.0511	2.8754	3.33347	3.8086	4.79712	3.20844	5.55785	2.45042	4.31114	6.16752	4.91268	3.87893	9.12796	2.65548	3.1311	10.5439	2.59694	1.1331	6.77851
CSAD	1.38343	0.922423	-1.45431	0.0198884	-2.01194	0.0247532	FALSE	TRUE	60.122	43.4585	87.436	98.1073	67.1044	106.849	199.676	56.7283	132.463	23.283	35.6671	110.446	9.79402	30.652	62.7699	18.9025	21.7039	47.4417	69.532	67.7034	78.4084	30.6399	33.1366	93.496	31.0413	34.9723	67.6142
DUSP2	-1.00361	0.922822	2.2951	0.00374064	2.30338	0.00475114	TRUE	TRUE	9.13628	9.16923	3.98077	6.01734	6.39377	5.23047	10.7226	13.8471	2.43283	3.08579	3.50014	5.39547	7.99514	11.1552	4.904	7.52608	8.47353	3.55822	8.69158	3.70262	2.92102	14.6784	15.329	3.84542	14.3733	10.9525	3.55876
SLC19A3	-1.06129	0.925309	2.22457	0.0194136	2.36091	0.0239768	TRUE	TRUE	13.9307	14.7845	6.26221	27.4701	41.3829	9.6069	23.8874	5.36023	2.31119	16.761	15.5003	1.74566	5.19687	5.33088	2.28858	7.35105	19.0281	10.6745	5.66846	4.76049	4.47275	12.2471	16.1117	9.33874	12.8635	10.8014	9.65933
AC099522.1	-1.04212	0.92609	-3.01899	0.0184068	-2.89696	0.0148755	TRUE	TRUE	1.12636	1.1738	3.40046	0.132322	0.655765	1.56457	0.271056	1.0536	1.59844	0.708963	0.0843339	1.64421	3.13162	2.61595	10.2443	1.50385	3.30585	5.27502	1.43249	0.534742	1.89151	1.34212	0.758334	1.38825	0.488448	0.381844	3.59734
FOXD1	-1.04209	0.926135	-3.01892	0.0185242	-2.89699	0.0149738	TRUE	TRUE	1.1023	1.1487	3.32776	0.129497	0.641702	1.53115	0.265269	1.0311	1.5643	0.693823	0.0825347	1.60909	3.06474	2.55984	10.0253	1.47173	3.23524	5.16235	1.40189	0.523322	1.85111	1.31346	0.742139	1.3586	0.478017	0.373691	3.52019
OTUB2	-1.12655	0.927705	2.85528	0.0194054	3.21661	0.0238059	TRUE	TRUE	4.40993	4.968	1.54448	4.44762	1.64948	1.38775	5.18264	3.57352	0.121736	3.50656	7.50019	0.555506	2.19873	1.03664	0.0001	5.95087	5.35174	1.66056	2.45639	1.76321	1.73439	7.55065	9.65403	3.84542	3.98594	9.21519	3.05038
SCGB2A2	-1.15431	0.927916	-11.9792	0.052112	-10.3778	0.0431165	FALSE	TRUE	60.7241	70.0941	727.426	11.5113	102.41	479.486	66.9562	150.828	0.851555	39.9037	47.6673	24.5173	246.647	32.429	1190.99	67.0338	112.087	310.98	29.6645	112.31	896.995	19.5466	1.43514	501.54	4.52947	1.5863	2414.05
ACP5	-1.03746	0.928231	2.06291	0.00041975	2.14019	0.000331817	TRUE	TRUE	39.0356	40.498	18.9226	35.3187	26.116	17.7193	41.1628	18.9095	12.5287	37.5194	44.1672	18.1698	26.5836	35.983	14.7118	68.0841	71.9501	26.3302	27.0193	42.3146	25.193	48.756	50.553	17.5787	27.8407	33.9903	19.1491
CALML6	1.15854	0.928465	-2.27786	0.00425107	-2.63899	0.00530004	TRUE	TRUE	5.11499	4.41504	11.6512	11.2497	8.22848	14.4103	8.93552	4.9231	18.0023	1.82346	6.66684	21.0262	1.79898	2.02382	12.7502	1.75033	2.37861	7.35356	9.06947	4.40787	4.38147	2.72924	3.06587	9.7782	3.5632	3.62571	5.50756
C20orf203	1.26612	0.929164	-1.99284	0.0300043	-2.52318	0.0246528	FALSE	TRUE	1.62298	1.28185	3.23434	1.04658	1.01938	1.60123	5.65919	0.59567	7.54156	0.420876	0.666774	4.04663	0.199976	0.987281	2.28858	0.875214	0.44607	5.45589	2.0785	3.35	1.278	1.25403	2.28312	1.86783	1.4495	0.906502	1.79501
ZDHHC11	-1.02727	0.931031	-2.08054	0.000716575	-2.0253	0.000572575	TRUE	TRUE	32.217	33.0957	67.0288	28.2549	19.7077	47.7137	32.5847	68.3416	74.4415	22.9324	31.3338	142.738	21.9864	25.4928	66.3662	30.279	26.461	58.1162	29.8534	37.2017	55.0411	42.9286	20.5752	46.1437	48.9168	35.6518	45.6697
DLL4	-1.08846	0.933022	-2.62534	0.0258908	-2.41198	0.0311533	TRUE	TRUE	1.09469	1.19152	2.87392	0.261719	1.51976	1.70798	2.02546	1.65004	2.79774	1.54294	0.166769	0.714194	1.39923	0.987281	4.57707	1.22526	2.52726	2.13497	0.377991	1.41059	5.1117	1.62283	1.04377	1.11802	0.302058	0.2267	4.82972
FGD5	1.17883	0.935121	-1.97038	0.0206753	-2.32273	0.0171801	FALSE	TRUE	7.44767	6.31786	14.6747	0.523338	4.04017	9.17993	10.1865	10.2737	12.5287	5.40005	2.33346	6.3476	13.9914	7.15716	13.731	8.40119	14.2711	17.5535	11.7147	5.11311	27.7488	5.01586	3.65294	9.88806	4.34829	3.70124	20.42
TFAP2E	1.0998	0.938366	-1.96006	0.0351905	-2.15567	0.0415288	FALSE	TRUE	11.3758	10.3435	22.2972	30.0863	15.3264	35.1183	2.85943	20.6962	23.7192	9.74807	7.16685	41.8936	3.59787	7.45332	30.7312	6.47594	4.90577	19.4512	22.1067	17.1022	4.74659	8.70384	3.97908	12.6347	7.42826	6.11831	10.083
ACRC	1.18997	0.939818	-2.33274	0.0510881	-2.7759	0.0436124	FALSE	TRUE	3.12787	2.62853	7.29652	3.66277	3.16914	5.97767	5.83791	5.06245	10.9474	1.75333	1.50012	3.88794	0.199976	1.43151	2.61551	0.875214	0.297413	2.37218	6.04635	2.82107	3.19485	3.68812	3.19633	22.8523	2.95929	3.55017	6.52432
TPPP3	1.13	0.940019	-1.90961	0.0219211	-2.15787	0.0184877	FALSE	TRUE	126.873	112.277	242.278	25.6388	27.4465	83.8996	73.3897	106.756	177.468	95.5162	36.5005	121.396	56.565	111.946	337.388	79.6355	189.389	257.608	120.169	113.897	465.79	254.252	150.484	221.16	309.818	161.794	273.517
NTAN1	-1.0243	0.941186	1.96322	0.0145138	2.01092	0.0172023	FALSE	TRUE	43.0676	44.114	21.9372	38.1965	40.3636	11.7417	45.2133	12.656	9.48775	60.2412	85.6677	17.8524	53.7667	26.9008	11.7694	57.5826	65.1117	24.1953	22.1067	29.444	30.5784	53.1814	56.8148	38.0138	14.2522	35.9538	31.8586
ARHGAP6	1.18764	0.943007	-2.25811	0.0105701	-2.68183	0.00892041	TRUE	TRUE	2.22445	1.873	5.02307	0.784957	1.13058	4.8035	6.96972	2.68017	2.55447	1.1923	0.833443	2.45976	0.599728	2.46805	2.28858	1.40028	2.82458	7.82797	2.26744	2.99738	6.93728	2.95052	1.36991	2.63689	1.63067	0.679901	10.6761
RP11-632K20.7	1.24052	0.943827	-1.8233	0.0131103	-2.26184	0.0111146	FALSE	TRUE	189.925	153.101	346.29	51.2774	102.929	162.78	571.501	218.722	529.604	111.361	171.67	251.921	126.125	104.888	136.323	106.594	108.225	272.793	240.908	151.979	319.282	164.039	204.609	763.11	147.597	161.785	334.51
S100PBP	1.00687	0.943972	-2.0717	0.0250065	-2.08593	0.0213645	TRUE	TRUE	22.5353	22.3816	46.6865	21.9761	16.9018	37.7867	36.9332	43.3172	79.5505	12.974	31.5004	33.007	12.1925	14.1657	17.6541	9.97639	7.58159	17.0791	33.6324	19.0416	30.9436	23.9723	25.2439	105.362	28.6258	21.3006	52.1089
NRN1	1.34203	0.946302	-2.63178	0.018546	-3.53191	0.0216022	TRUE	TRUE	9.00262	6.70825	23.6929	6.27895	4.41081	5.33721	37.5884	10.8693	10.7041	2.59488	2.33346	3.72926	6.79588	2.91229	11.7694	2.45042	12.4873	21.3488	7.9358	7.22884	71.38	6.56478	8.74083	23.8411	1.81185	4.68318	41.4331
CTGF	1.04079	0.947134	-1.94817	0.0268127	-2.02764	0.0231331	FALSE	TRUE	33.0652	31.7692	64.4165	6.27895	13.4361	27.9666	32.0485	18.3139	64.5891	26.9999	20.3337	22.6131	43.7729	39.7835	65.0584	50.5817	41.624	87.53	34.3881	57.3011	72.6579	37.1754	23.026	42.7381	33.2758	40.335	132.179
SCGB2B2	1.15231	0.947355	-2.85074	0.00610734	-3.28494	0.00519904	TRUE	TRUE	2.04358	1.77346	5.82572	2.87791	3.13207	6.19115	5.54006	2.82906	3.04101	3.78708	1.50012	3.01516	0.99948	0.987281	9.80789	0.700191	1.0407	3.08381	0.377991	3.70262	10.8623	1.40155	0.391475	1.53823	0.664407	0.604368	9.06622
CORO6	-1.0659	0.94788	-2.34229	0.0209211	-2.19748	0.0180361	TRUE	TRUE	6.52571	6.95576	15.2851	9.94162	16.3457	24.4442	12.8075	14.5916	28.9496	3.99747	2.16679	21.0262	2.59849	4.19562	11.4425	2.62544	3.27055	17.3163	5.29057	5.99466	9.03668	8.48255	3.71817	3.62569	6.462	5.36298	6.43959
SNTG2	1.04295	0.948108	-2.37307	0.00359312	-2.47498	0.00422134	TRUE	TRUE	5.17523	4.96213	12.2812	2.35467	3.8919	7.04509	6.37403	6.40248	29.9227	2.17411	1.00011	7.93447	4.39737	8.98345	10.1348	1.5753	3.56786	9.96285	15.1157	5.46573	10.8623	5.6059	7.89284	9.33874	3.80477	2.49271	13.0485
DPY19L1P1	1.28117	0.949119	-1.57703	0.0236466	-2.02044	0.020486	FALSE	TRUE	3.19164	2.4912	5.03333	4.97086	3.05773	4.8035	11.4374	4.76466	5.23047	1.26243	2.16679	6.3476	1.79898	0.493691	3.26936	0.350145	1.93264	5.21868	1.88955	4.76049	6.20705	1.77035	1.69606	4.61448	2.05341	1.05757	4.57553
S100A7	1.23637	0.950187	4.17482	0.0560474	3.37668	0.0492464	FALSE	TRUE	19.0409	15.4007	4.5609	96.8346	22.7011	18.0481	6.48654	31.8966	4.37901	26.061	29.9464	2.75671	2.99824	15.4814	2.94244	3.2446	3.97023	2.37218	3.16807	0.352721	0.0001	5.9667	11.1592	5.64965	7.56777	7.69801	0.33902
BNC2	-1.09249	0.950627	1.90308	0.0346961	2.0791	0.0396323	FALSE	TRUE	58.6409	64.0647	30.8136	13.0811	28.8967	20.1744	36.0395	25.0141	23.111	57.0848	22.167	54.9056	112.131	190.621	64.0777	63.8834	56.1923	46.9674	65.1863	56.9485	8.1239	68.1539	86.7535	15.9307	53.5668	45.9243	13.218
TSHZ3	1.10493	0.95178	-1.98408	0.0379927	-2.19228	0.0333471	FALSE	TRUE	1.79211	1.62192	3.55569	0.261719	1.00085	1.81472	5.24221	0.446778	2.06792	0.841652	1.50012	2.14238	1.59911	2.36933	2.61551	1.05024	4.16249	4.98147	2.64533	0.529032	8.85413	1.54907	1.30488	1.64809	1.14754	1.66184	4.32134
STX16	1.30797	0.952662	-1.96419	0.0260239	-2.56911	0.0227967	FALSE	TRUE	200.35	153.176	393.527	284.381	203.54	449.401	624.555	393.379	779.891	58.628	157.002	310.539	50.7684	56.0225	115.078	40.4304	45.043	155.371	353.713	150.569	226.646	95.1516	97.7146	864.054	95.1765	122.14	247.235
ITPR2	1.01537	0.95485	-2.12728	0.000710418	-2.15997	0.000613494	TRUE	TRUE	140.811	138.68	299.544	70.8988	77.6901	243.159	111.038	209.939	173.332	145.939	134.835	344.894	218.065	117.919	239.637	116.04	99.5998	220.367	243.551	254.944	343.191	132.845	105.67	605.797	88.1103	108.843	225.975
MEG8	1.47948	0.955807	-3.18088	0.000463528	-4.70604	0.000401205	TRUE	TRUE	1.55286	1.04961	4.93947	0.784957	0.444877	2.24169	5.8379	1.48903	6.6901	0.561134	1.16678	2.5391	0.599728	0.789845	3.26936	0.175123	0.44607	6.87914	1.70061	1.76321	6.84599	1.91787	1.23946	2.74676	0.845581	1.05757	8.30364
SLC5A6	1.13316	0.956712	2.45071	0.0048255	2.16273	0.00551125	TRUE	TRUE	100.071	88.312	40.8336	89.4738	117.98	36.2924	75.8923	46.4547	30.6525	155.198	94.1682	70.0611	61.3621	132.777	77.4817	264.286	146.426	52.6603	60.0846	58.8878	25.5582	63.6551	51.7919	15.4913	30.6186	58.0103	18.4713
PRRT4	-1.25304	0.957484	-3.73504	0.00594728	-2.98077	0.00522192	TRUE	TRUE	1.25761	1.57584	4.69723	1.30819	3.28033	2.98888	1.3702	1.48903	13.8667	2.31437	1.33345	4.84007	1.39923	1.87574	5.55785	1.05024	3.27055	4.50706	0.377991	0.176411	1.46056	1.03275	0.652392	2.74676	1.20793	0.528835	1.60997
VENTX	1.14837	0.957569	-3.54841	0.00261197	-4.07487	0.00228478	TRUE	TRUE	0.995261	0.866677	3.5316	1.30819	0.500474	0.910851	1.66804	0.446778	5.59538	1.12217	1.16678	1.11091	0.199976	0.493691	1.30781	0.525168	1.48667	7.11635	2.0785	1.41059	5.20298	0.516423	0.521934	2.85662	0.543624	0.906502	4.15188
C16orf96	-1.03543	0.959944	-2.82489	0.00573521	-2.72822	0.00647965	TRUE	TRUE	1.866	1.93212	5.27126	1.56981	2.33518	3.20237	2.1446	2.53127	12.8936	1.40269	1.00011	5.15744	1.19936	1.23408	7.51941	1.05024	1.18935	4.26985	3.59006	3.70262	2.00823	1.91787	1.50037	5.93288	2.05341	1.96397	1.18632
ANKK1	1.1147	0.96294	-1.98265	0.0272523	-2.21005	0.0301851	FALSE	TRUE	4.82992	4.33295	9.57606	15.6972	4.57758	12.062	6.19532	6.10469	23.9625	3.85721	3.33347	9.75938	0.99948	1.9251	2.80455	2.62544	1.63532	5.45589	2.45639	7.93408	10.2233	3.9094	1.82652	5.05395	2.89889	7.32685	7.28689
C9orf85	1.13782	0.963342	-1.77091	0.0414371	-2.01497	0.0456648	FALSE	TRUE	7.42576	6.52631	13.1503	5.75572	6.54203	10.4608	3.81254	6.10469	12.0421	3.71695	6.16684	14.4407	11.7928	5.47896	7.19248	3.32553	5.35174	6.64193	16.6273	6.87621	4.10764	7.00735	8.74082	31.4219	7.36786	6.94918	18.8949
SLC35G1	-1.11076	0.964961	3.15076	0.0250312	3.49973	0.0226911	TRUE	TRUE	4.56975	5.07588	1.45036	2.61629	2.6317	1.60123	2.85943	4.61577	1.58137	6.52213	14.6669	1.2696	5.99638	2.22126	0.0001	6.47594	4.60846	0.237308	1.32272	2.11583	1.73439	7.08111	4.76184	2.63689	3.68398	4.98531	2.542
STRC	1.00737	0.965766	-2.28619	0.0105455	-2.30303	0.0116673	TRUE	TRUE	2.69827	2.67853	6.16874	7.32543	2.93277	6.1267	2.84913	6.40248	11.3954	0.944024	1.77773	9.26884	1.59911	1.43151	8.82711	1.40028	0.594727	3.08381	3.77901	3.17369	2.28207	2.36044	2.32839	4.80725	1.32871	2.78695	3.55877
PLLP	1.15703	0.966491	-2.51199	0.00123979	-2.90646	0.00111321	TRUE	TRUE	11.7645	10.1678	29.5522	13.8659	14.27	43.5509	22.3982	9.23144	17.6374	15.8493	5.00016	22.6924	7.79526	6.02191	27.135	2.80046	10.1088	17.0791	3.59006	15.1628	61.9779	15.1948	8.4799	14.063	12.6219	13.0674	32.2823
MAPK15	1.05208	0.971826	-2.09624	0.0183404	-2.20541	0.0169178	TRUE	TRUE	4.83812	4.59862	10.1419	16.4821	7.19067	11.7418	5.6592	12.5071	24.3274	1.12217	1.33345	6.10957	2.19873	1.62895	9.15404	0.875214	0.743383	9.25123	3.02322	5.81835	4.2902	4.57325	3.26156	6.26248	4.77104	4.30551	9.99827
RASSF6	1.16526	0.976074	-2.55242	0.000406204	-2.97423	0.000375637	TRUE	TRUE	14.9087	12.7943	38.0534	4.97086	8.20993	14.944	37.7076	13.4716	47.6816	9.60781	12.5002	16.9003	18.8363	11.4514	31.0581	8.92626	9.36547	32.0232	17.8722	19.5706	48.6516	14.1621	10.1106	65.0409	7.18669	17.6749	48.1271
ATHL1	1.03254	0.976849	-2.26058	0.00577172	-2.33413	0.00537721	TRUE	TRUE	13.7336	13.3008	31.0458	20.1448	29.3182	41.9498	38.3031	28.4386	46.7085	10.0987	7.50019	44.6705	5.39675	10.6616	17.9811	12.9518	9.36547	49.5767	10.0142	8.11039	15.5175	6.85983	7.04486	12.3051	6.09965	5.96725	19.6575
PPP1R3E	1.06459	0.977956	-1.93681	0.0326267	-2.06192	0.0307189	FALSE	TRUE	5.28936	4.96844	10.2445	9.94162	6.41204	9.28668	4.40824	7.29584	18.4888	3.92734	5.00016	14.52	3.19811	3.60331	8.82711	4.02562	2.22995	6.64193	10.3921	7.05253	1.82567	2.79827	4.30523	11.0966	3.62359	3.84849	11.2692
TTC12	1.02462	0.979065	-2.34341	0.0251889	-2.40109	0.0266991	TRUE	TRUE	31.7642	31.0011	74.4365	49.9693	42.4027	63.6182	71.5435	78.1682	229.166	16.0597	22.167	49.9867	13.9914	14.9559	18.308	7.7011	7.73025	36.293	52.7159	39.4937	43.9961	20.2105	20.8082	105.912	21.9221	22.2825	48.2119
LGI4	-1.22979	0.980141	-3.9514	0.00364825	-3.21308	0.00342946	TRUE	TRUE	1.44047	1.77146	5.69184	3.13953	1.3715	2.13494	1.07235	1.48903	3.64919	0.701393	0.166769	5.7922	1.19968	0.888563	2.94244	1.05024	4.01383	8.5396	1.13377	2.99738	6.38961	1.47531	0.978539	1.42836	1.75145	2.2661	14.6584
OVOL2	-1.0312	0.983732	-2.01662	0.000648715	-1.9556	0.0006839	TRUE	FALSE	25.2222	26.0092	50.8636	34.0105	32.0798	49.422	36.7546	28.5875	72.9824	21.4597	14.1669	68.7122	15.3905	22.9028	63.4239	22.0529	20.812	54.0837	21.3509	45.6647	35.5076	25.8164	16.8945	26.2582	24.9419	26.9657	36.5189
FLI1	-1.26589	0.985487	-2.12764	0.0236809	-1.68075	0.024662	TRUE	FALSE	3.53388	4.4735	7.51883	2.09305	2.20545	5.23047	2.26374	12.0604	4.50065	2.66501	0.833443	3.33254	6.39613	2.86293	9.15404	2.80046	8.17622	10.9117	4.34584	1.76321	7.30239	4.86829	4.10954	5.82301	2.8385	3.77678	13.8958
NRBP2	1.22518	0.987158	-1.75768	0.0341003	-2.15347	0.0329304	FALSE	TRUE	272.363	222.304	478.726	691.446	370.539	658.016	527.523	481.947	1045.47	71.2515	153.337	692.743	71.5557	84.3054	196.81	60.2079	61.2466	271.601	482.189	341.161	230.571	134.985	125.24	422.546	139.744	160.659	312.051
CNN1	-1.37747	0.987722	-5.13792	0.023572	-3.72998	0.0227735	TRUE	TRUE	13.8396	19.0636	71.1069	11.7729	12.6206	54.0118	6.79102	68.0442	4.02811	8.97666	5.8335	16.6623	38.6653	14.0181	51.6545	11.5516	21.0584	126.195	7.74686	26.4467	72.5663	21.4079	2.6745	11.2354	3.80477	1.8129	232.502
SOAT1	1.34909	0.998687	6.10896	0.00461317	4.5282	0.00463187	TRUE	TRUE	688.636	510.444	112.725	505.076	404.157	56.0399	1178.56	138.173	42.4512	1028.37	1004.09	114.175	413.743	144.823	66.0392	1706.52	1071.76	63.8091	36.0887	221.269	61.4306	585.471	753.848	332.462	55.2589	345.43	165.397
Area 1 – Periorbital area (crow’s feet); Area 2 – Preauricular area (wrinkle-free); Area 3 - Gluteal area; DE - Differentially Expressed; CPM – counts per Million; A1 – area 1; A2 – area 2; A3 – area 3.
